1 **An ancient deletion in the ABO gene affects the composition of the porcine microbiome**  
2 **by altering intestinal N-acetyl-galactosamine concentrations.**

3 Hui Yang<sup>1\*</sup>, Jinyuan Wu<sup>1\*</sup>, Xiaochang Huang<sup>1</sup>, Yunyan Zhou<sup>1</sup>, Yifeng Zhang<sup>1</sup>, Min Liu<sup>1</sup>, Qin Liu<sup>1</sup>,  
4 Shanlin Ke<sup>1</sup>, Maozhang He<sup>1</sup>, Hao Fu<sup>1</sup>, Shaoming Fang<sup>1</sup>, Xinwei Xiong<sup>1</sup>, Hui Jiang<sup>1</sup>, Zhe Chen<sup>1</sup>,  
5 Zhongzi Wu<sup>1</sup>, Huanfa Gong<sup>1</sup>, Xinkai Tong<sup>1</sup>, Yizhong Huang<sup>1</sup>, Junwu Ma<sup>1</sup>, Jun Gao<sup>1</sup>, Carole  
6 Charlier<sup>2,1</sup>, Wouter Coppieters<sup>2,1</sup>, Lev Shagam<sup>2</sup>, Zhiyan Zhang<sup>1</sup>, Huashui Ai<sup>1</sup>, Bin Yang<sup>1</sup>, Michel  
7 Georges<sup>2,1,§,†</sup>, Congying Chen<sup>1,§,†</sup>, Lusheng Huang<sup>1,§,†,#</sup>.

8 <sup>1</sup>National Key Laboratory for Swine genetic improvement and production technology,  
9 Ministry of Science and Technology of China, Jiangxi Agricultural University, NanChang, Jiangxi  
10 Province, 330045, PR China. <sup>2</sup>Unit of Animal Genomics, GIGA-Institute and Faculty of  
11 Veterinary Medicine, University of Liege, 4000 Liege, Belgium.

12 \*Contributed equally to this work. §Senior authors. †Corresponding authors. #Lead contact.

13

14 **Summary**

15 We have generated a large heterogenous stock population by intercrossing eight divergent  
16 pig breeds for multiple generations. We have analyzed the composition of the intestinal  
17 microbiota at different ages and anatomical locations in > 1,000 6<sup>th</sup>- and 7<sup>th</sup>- generation  
18 animals. We show that, under conditions of exacerbated genetic yet controlled  
19 environmental variability, microbiota composition and abundance of specific taxa (including  
20 *Christensenellaceae*) are heritable in this monogastric omnivore. We fine-map a QTL with  
21 major effect on the abundance of *Erysipelotrichaceae* to chromosome 1q and show that it is  
22 caused by a common 2.3-Kb deletion inactivating the ABO acetyl-galactosaminyl-transferase  
23 gene. We show that this deletion is a trans-species polymorphism that is  $\geq 3.5$  million years  
24 old and under balancing selection. We demonstrate that it acts by decreasing the  
25 concentrations of N-acetyl-galactosamine in the cecum thereby reducing the abundance of  
26 *Erysipelotrichaceae* strains that have the capacity to import and catabolize N-acetyl-  
27 galactosamine.

28

29 **Key words**

30 Intestinal microbiota composition, heritability, Quantitative Trait Loci (QTL), ABO gene, N-  
31 acetyl-galactosamine (GalNac), pig

32

## 33 Introduction

34 It is increasingly recognized that a comprehensive understanding of the physiology and  
35 pathology of organisms (including humans) requires the integrated analysis of the host and  
36 its multiple microbiota, i.e. to consider the organism as a “holobiont” (Kundu et al., 2017). In  
37 human, intestinal microbiota composition is significantly associated with physiological and  
38 pathological parameters including HDL cholesterol, fasting glucose levels and body mass  
39 index (BMI)(Rothschild et al., 2018). In livestock, ruminal microbiome composition is  
40 associated with economically important traits including methane production and feed  
41 efficiency (O’Hara et al., 2020). These correlations reflect a complex interplay between host  
42 and microbiota, which may include direct (“causal”) effects of the microbiome on the host’s  
43 physiology. This is supported by conventionalization experiments (aka human microbiota-  
44 associated (HMA) rodents), although it has been rightfully pointed out that the conclusions  
45 of many of these experiments have to be considered with caution (Walter et al., 2020).  
46 Several of the phenotypes correlated with microbiota composition, whether in humans or  
47 animals, are heritable in the sense that a significant fraction of the trait variance can be  
48 explained by genetic differences between individuals (Falconer & Mackay, 1996; Polderman  
49 et al., 2015; Polubriaginof et al., 2018). Combined, this leads to the intriguing hypothesis that  
50 the genotype of the host may determine the composition of the microbiota which may in turn  
51 affect the host’s phenotype (Goodrich et al., 2014; Schmidt et al., 2018). This assertion  
52 implies that the composition of the microbiota is itself heritable. While mapping data in  
53 rodents support this hypothesis (Schlamp et al., 2019), the evidence has been shallower in  
54 humans. Initial reports didn’t reveal a higher microbiota resemblance between monozygotic  
55 than dizygotic twins suggesting limited impact of host genotype on microbiota composition  
56 (Yatsunenکو et al., 2012). Yet better-powered studies using larger twin cohorts provided  
57 evidence for a significant impact of host genetics on the abundance of some taxa, particularly  
58 the family *Christensenellaceae* (Goodrich et al., 2014). Specific loci that may underpin  
59 microbiota heritability have remained difficult to identify. Apart from chromosome 2 variants  
60 that cause persistent expression of lactase (*LCT*) in the gut which have reproducibly been  
61 found associated with increased proportions of *Bifidobacterium* (probably as a consequence  
62 of altered dietary habits due to lactose tolerance), other GWAS-identified loci have proven  
63 more difficult to replicate (Blekhman et al., 2015, Turpin et al., 2016, Bonder et al., 2016,  
64 Wang et al., 2016, Rothschild et al., 2018, Hughes et al., 2020). The analysis of larger human

65 cohorts is needed to gain a better understanding of the likely highly polygenic genetic  
66 architecture of microbiota composition.

67 In an effort to contribute to deciphering the genetic architecture of intestinal microbiota  
68 composition in an omnivorous, monogastric model of size comparable to human we herein  
69 report the generation of a mosaic pig population by intercrossing eight divergent founder  
70 breeds for up to seven generations (hence exacerbating genetic variation), and the  
71 longitudinal characterization of the intestinal microbiome of F6 and F7 animals that were  
72 raised in uniform conditions (hence minimizing environmental variation). We provide  
73 evidence for a strong impact of host genotype on microbiome composition and identify a  
74 locus with large effect on the abundance of specific taxa by controlling the concentration of  
75 a particular metabolite in the gut thereby affecting species that can use this metabolite as  
76 carbon source.

77

## 78 **Results**

### 79 **Generating a large mosaic pig population for genetic analysis of complex phenotypes.**

80 We have generated a large (> 7,500 animals in total) multigenerational (> seven generations)  
81 heterogeneous or mosaic population by inter-crossing the offspring of 61 founder animals (F0)  
82 representing four aboriginal Chinese breeds and four commercial European and American  
83 breeds using a rotational design (Fig. 1A; Suppl. Table 1). All animals were reared in  
84 standardized housing and feeding conditions at one location (see Methods). We  
85 measured >200 phenotypes (pertaining to body composition, physiology, disease resistance  
86 and behavior), transcriptome, epigenome and chromatin interaction data on multiple tissues,  
87 plasma metabolome and microbiome data (see hereafter) in up to 954 F6 and 892 F7 animals.  
88 All F0 animals were whole-genome sequenced at average 28.4-fold depth (range: 23.1 – 37.2),  
89 while all F6 and F7 animals were sequenced at average 8.0-fold depth (range: 5.2-12.4). SNPs  
90 were detected and genotypes called using Platypus yielding 23.8 million SNPs and 6.4 million  
91 indels with  $MAF \geq 0.03$  (in F0, F6 and F7 combined) for further analyses. The nucleotide  
92 diversity averaged  $2.5 \times 10^{-3}$  within Chinese founders,  $2.0 \times 10^{-3}$  within European founders,  
93  $3.6 \times 10^{-3}$  between Chinese founders,  $2.5 \times 10^{-3}$  between European founders and  $4.3 \times 10^{-3}$   
94 between Chinese and European founders (Fig. 1B). We used a linear model incorporating all  
95 variants to estimate the average contribution of the eight founder breeds in the F6 and F7  
96 generation at genome and chromosome level (Coppieters et al., 2020). At genome-wide level,

97 the proportion of the eight founder breed genomes ranged from 11.2% (respectively 11.5%)  
 98 to 14.1% (14.7%) in the F6 (F7) generations. At chromosome-specific level, the proportion of  
 99 the eight founder breeds ranged from 6.7% (respectively 4.9%) to 20.7% (22.1%) in the F6 (F7)  
 100 generations (Fig. 1C). As indicators of mapping resolution achievable in this cross, the median  
 101 number of variants in high linkage disequilibrium (LD) ( $r^2 \geq 0.9$ ) with a reference variant was  
 102 30 (Fig. 1D), and the median maximal distance with a high variant in high LD ( $r^2 \geq 0.9$ ) was  
 103 54,015 base pairs (Fig. 1E).

104  
 105

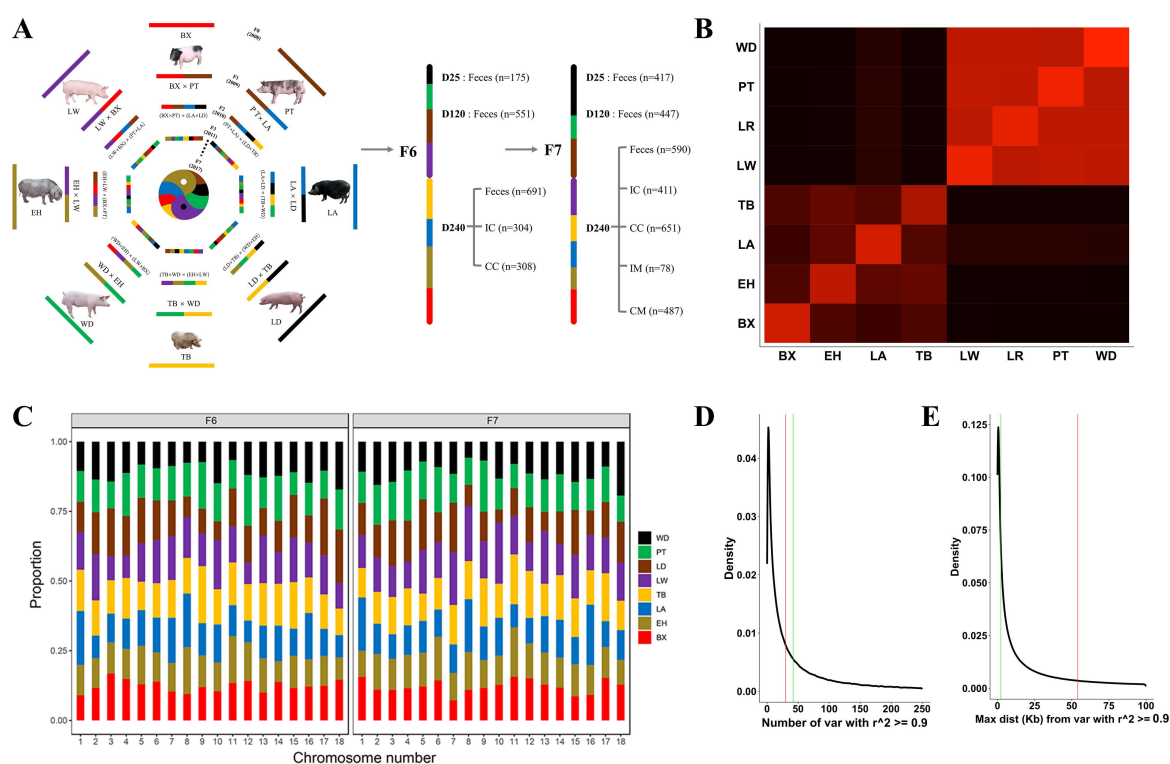

106  
 107 **Figure 1:** (A) Rotational breeding design used for the generation of a large mosaic pig  
 108 population for the genetic analysis of complex phenotypes, with sampling scheme for feces  
 109 (D25, D120, D240), luminal content of the ileum (IC) and cecum (CC), and mucosal scrapings  
 110 in the ileum (IM) and cecum (CM). BX: Bamaxiang, EH: Erhualian, LA: Laiwu, TB: Tibetan, LW:  
 111 Large White, LD: Landrace, PT: Piétrain, WD: White Duroc. (B) Average similarity ( $1 - \pi$ )  
 112 between allelic sequences sampled within and between the eight founder breeds. The color  
 113 intensity ranges from black (breeds with lowest allelic similarity: BX vs WD,  $1-4.3 \times 10^{-3}$ ) to  
 114 bright red (breed with highest allelic similarity: WD,  $1-1.8 \times 10^{-3}$ ). The acronyms for the breeds

115 are as in (A). Within-breed similarity is higher than between-breed similarity as expected.  
 116 Between-breed similarity is lower for Chinese than for European breeds, and still lower  
 117 between Chinese and European breeds. Laiwu are slightly more similar to European breeds  
 118 than the other Chinese breeds. **(C)** Autosome-specific estimates of the genomic contributions  
 119 of the eight founder breeds in the F6 and F7 generation. **(D)** Frequency distribution (density)  
 120 of the number of variants in high LD ( $r^2 \geq 0.9$ ) with a reference variant, corresponding to the  
 121 expected size of “credible sets” in GWAS (Huang et al., 2017). The red vertical line  
 122 corresponds to the genome-wide median. The green vertical line corresponds to the mapping  
 123 resolution achieved in this study for the ABO locus (see hereafter). **(E)** Frequency distribution  
 124 (density) of the maximum distance between a reference variant and a variant in high LD ( $r^2 \geq$   
 125 0.9) with it defining the spread of credible sets. Red and green vertical lines are as in (D).  
 126

**Supplemental Table 1:** Numbers of parents used and animals produced for the different generations of the mosaic pig population.

| Generation | Total nr animals produced | Nr animals used as boars | Nr animals used as sows |
|------------|---------------------------|--------------------------|-------------------------|
| F0         | 61                        | 29                       | 32                      |
| F1         | 265                       | 32                       | 58                      |
| F2         | 575                       | 56                       | 87                      |
| F3         | 776                       | 57                       | 75                      |
| F4         | 746                       | 62                       | 97                      |
| F5         | 938                       | 85                       | 170                     |
| F6         | 1663                      | 82                       | 111                     |
| F7         | 1227                      | 72                       | 94                      |
| F8         | 780                       | 66                       | 83                      |
| F9         | 595                       | 62                       | 56                      |

127

**Supplemental Table 2:** 16S rRNA based microbiome profiling of 12 data sets: summary statistics

| Generation | Dataset | Sample type   | Sample size | Number of tags |        |        | Number of OTUs (selected) |       |       |        | Number of Taxa |       |       |        |       |         |
|------------|---------|---------------|-------------|----------------|--------|--------|---------------------------|-------|-------|--------|----------------|-------|-------|--------|-------|---------|
|            |         |               |             | Mean           | Min    | Max    | Mean                      | Min   | Max   | Total  | Phylum         | Class | Order | Family | Genus | Species |
| F6         | D25     | Feces         | 175         | 34,153         | 25,486 | 43,557 | 804                       | 229   | 1,640 | 8,085  | 34             | 77    | 130   | 182    | 300   | 135     |
|            | D120    | Feces         | 551         | 33,378         | 22,807 | 43,447 | 1,751                     | 651   | 2,616 | 10,657 | 31             | 72    | 121   | 171    | 285   | 123     |
|            | D240    | Feces         | 691         | 32,024         | 19,632 | 43,045 | 2,048                     | 1,168 | 2,884 | 11,291 | 40             | 83    | 144   | 197    | 339   | 140     |
|            | IC      | Ileal content | 304         | 34,034         | 24,993 | 43,854 | 378                       | 60    | 2,333 | 6,448  | 40             | 85    | 145   | 200    | 341   | 143     |
|            | CC      | Cecum content | 308         | 34,005         | 23,593 | 43,674 | 1,446                     | 622   | 2,663 | 9,876  | 25             | 50    | 92    | 145    | 249   | 119     |
| F7         | D25     | Feces         | 417         | 45,094         | 20,993 | 79,771 | 978                       | 264   | 2,115 | 9,738  | 24             | 42    | 72    | 122    | 235   | 118     |
|            | D120    | Feces         | 447         | 41,796         | 26,425 | 65,235 | 2,285                     | 491   | 3,005 | 10,362 | 23             | 39    | 64    | 110    | 195   | 94      |
|            | D240    | Feces         | 590         | 40,915         | 24,010 | 61,986 | 2,422                     | 1,138 | 3,112 | 10,226 | 23             | 41    | 62    | 101    | 189   | 96      |
|            | IC      | Ileal content | 411         | 54,700         | 29,825 | 73,709 | 241                       | 54    | 1,120 | 4,773  | 30             | 64    | 119   | 170    | 304   | 132     |
|            | IM      | Ileal mucosa  | 78          | 52,239         | 29,860 | 73,685 | 1,024                     | 217   | 2,014 | 7,722  | 30             | 64    | 116   | 165    | 298   | 131     |
|            | CC      | Cecum content | 651         | 47,796         | 30,835 | 62,424 | 2,083                     | 295   | 2,892 | 10,416 | 22             | 38    | 66    | 113    | 220   | 115     |
|            | CM      | Cecum mucosa  | 487         | 45,836         | 27,520 | 71,481 | 1,179                     | 279   | 2,243 | 10,265 | 27             | 58    | 110   | 161    | 289   | 132     |

128

129

### 130 **Characterizing the age- and location-specific composition of the intestinal microbiome of** 131 **the healthy pig.**

132 We collected feces at 25 days (i.e. suckling period), 120 days (i.e. growing period) and 240  
 133 days (i.e. day of slaughter), as well as cecal and ileal content and mucosal scrapings (F7 only)  
 134 at day 240 in the F6 and F7 generations (total of 7 traits and 12 data series) (Fig. 1A). We

135 performed 16S rRNA sequencing (V3-V4 hypervariable region) and obtained usable post-QC  
136 data for 5,110 samples. Sample size per data series averaged 426 (range: 78-691) (Suppl.  
137 Table 2). Sequence tags were rarefied to ~20,000 per sample, and clustered in 32,032 OTUs  
138 (97% similarity threshold). 12,054 OTUs present in at least 0.2% of the samples (with more  
139 than two tags in at least two samples) and amounting to an average of 98.7% of sample reads,  
140 were retained for further analysis. They were annotated to 41 phyla, 87 classes, 149 orders,  
141 207 families, 360 genera and 150 species. The number of OTUs detected per sample averaged  
142 1,575 (range: 54 to 3,112) (Suppl. Table 2). The first two Principal Coordinates (based on  
143 Bray-Curtis distance) separated the samples by trait consistently across the two cohorts,  
144 generating five dominant clusters: (i) day 25 feces, (ii) day 120 and 240 feces, (iii) cecal content  
145 and mucosa, (iv) ileal content, and (v) ileal mucosa (Fig. 2A). Fecal samples were dominated  
146 by *Firmicutes* and *Bacteroidetes*. Day 25 samples had larger proportions of *Proteobacteria*  
147 and *Fusobacteria*, while day 120 and day 240 samples had larger proportions of *Spirochaetes*.  
148 Cecum content and mucosa had lower proportion of *Firmicutes* and *Spirochaetes* than day  
149 120-240 feces, yet higher proportions of *Bacteroidetes*, *Proteobacteria* and *Fusobacteria*.  
150 Ileal samples differed more dramatically from the others. They had much lower proportions  
151 of *Bacteroidetes*, were dominated by *Clostridiaceae* (= *Firmicutes*) and *Enterobacteriaceae* (= *Proteobacteria*),  
152 and had a high proportion of *Pasteurellaceae* (= *Proteobacteria*). Ileal  
153 mucosa differed considerably from ileal content, having a higher proportion of *Bacteroidetes*  
154 and *Spirochaetes*, yet less *Firmicutes* and *Proteobacteria* (Fig. 2B and Suppl. Table 3). A total  
155 of 58 OTUs that were annotated to 21 taxa were identified in >95% of day 120 and 240 feces  
156 and cecum content samples of both F6 and F7 generations, hence defined as core bacterial  
157 taxa (Suppl. Fig. 1A).  $\alpha$ -diversity (measured by Shannon's index) of fecal samples was lower  
158 at day 25 than at days 120-240, reminiscent of the enrichment of the intestinal flora observed  
159 between child- and adult-hood in humans (Yatsuneneko et al., 2012; Radjabzadeh et al., 2020).  
160 It was also lower for ileal content than for cecal content and mucosa (and probably ileal  
161 mucosa) (Fig. 2C). Six percent of ileal content samples harbored less than 100 OTUs (Suppl.  
162 Table 2).  $\beta$ -diversity (measured by pair-wise Bray-Curtis dissimilarities) tended to be  
163 inversely proportional to  $\alpha$ -diversity, being higher for day 25 than for day 120 and 240 fecal  
164 samples. The variation of pair-wise Bray-Curtis dissimilarities was highest for ileal content  
165 which had the lowest  $\alpha$ -diversity (Fig. 2D). Microbiota composition of pig D240 feces was  
166 more similar to that of human than of mice feces (Suppl. Fig. 1B). Human feces contained

167 more *Proteobacteria* and less *Spirochaetes*, while mice feces contained more *Firmicutes* yet  
 168 less *Bacteroidetes* and *Spirochaetes* (Fig. 2B)

169

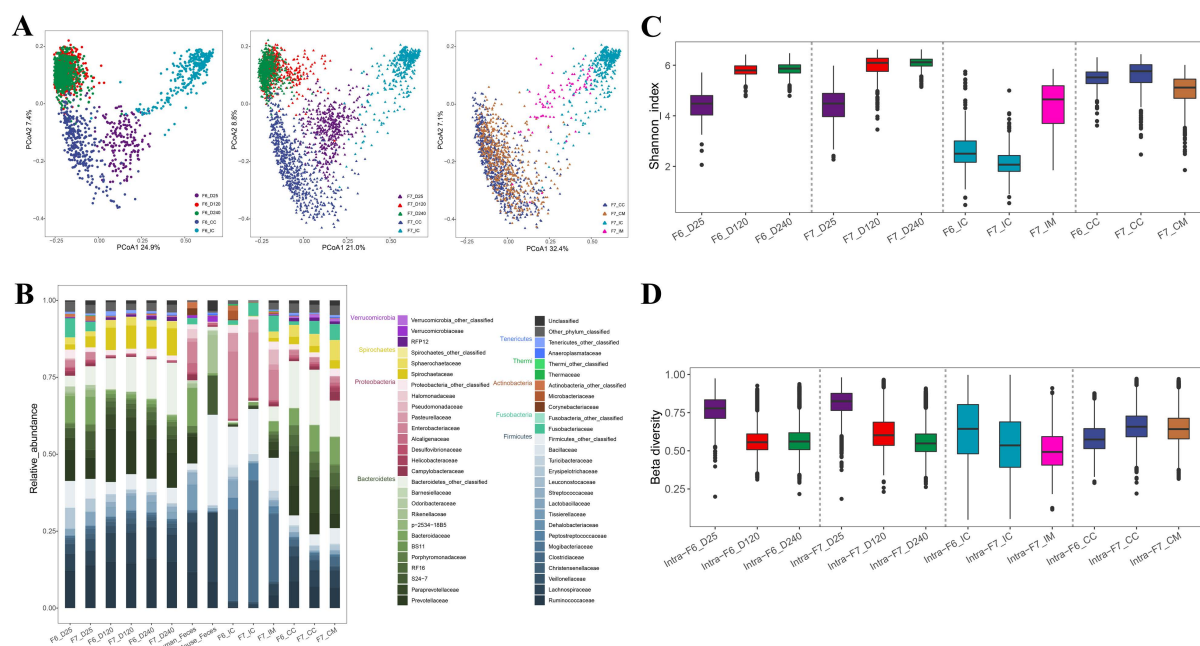

170

171 **Figure 2: (A)** Joint Principal Coordinate Analysis (PCoA) of 5,110 16S rRNA microbiome profiles.

172 (I) Generation F6: fecal samples day 25 (D25, mauve), fecal samples day 120 (D120, red), fecal  
 173 samples day 240 (D240, green), ileal content (IC, light blue), cecum content (CC, dark blue).

174 (II) Generation F7: fecal samples day 25 (D25, mauve), fecal samples day 120 (D120, red), fecal  
 175 samples day 240 (D240, green), ileal content (IC, light blue), cecum content (CC, dark blue).

176 (III) Generation F7: ileal content (IC, light blue), cecum content (CC, dark blue), ileal mucosa  
 177 (IM, pink), cecal mucosa (CM, brown).

178 **(B)** Average 16S rRNA microbiota composition of the  
 179 12 porcine data series. Taxa are colored by phylum and by family within phylum, highlighting  
 180 43 families that are amongst the top 15 in at least one data series. The names of the  
 181 corresponding phyla and families are provided in the legend. Average microbiota composition  
 182 of 106 human feces and 6 mouse feces (C57BL/6).

183 **(C)** Individual  $\alpha$ -diversities measured using  
 184 Shannon's index for the 12 porcine data series color-labelled as in A and B.

185 **(D)** Individual  $\beta$ -  
 186 diversities measured pair-wise Bray-Curtis dissimilarities for the 12 porcine data series color-  
 187 labelled as in A and B.

188

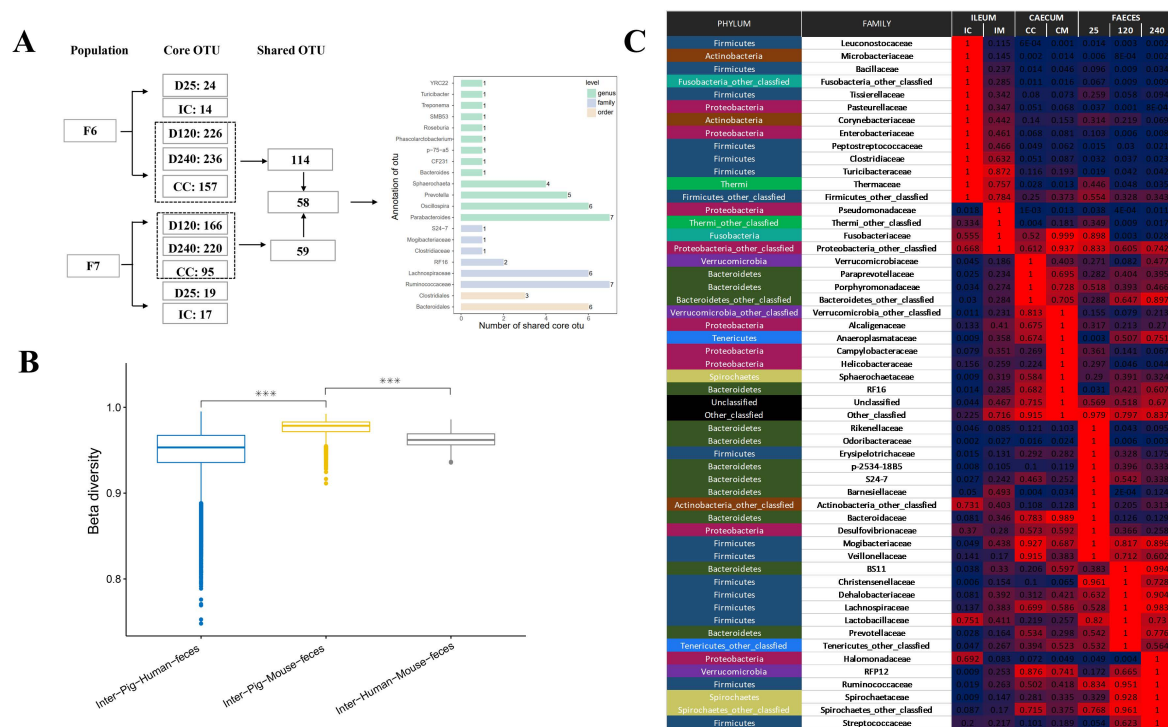

186

187 **Suppl. Fig. 1: (A)** Definition of a core intestinal microbiome of the pig. **(B)** The compositions

188 of the porcine and human intestinal microbiota are closer to each other than either is to that

189 of the mouse. **(C)** Abundances (F6-F7 averages when available) of the 43 families represented

190 in Fig. 2B in the seven types of samples (“traits”) relative to the sample type in which they are

191 the most abundant (red – blue scale). The families are ordered according to the sample type

192 in which they are the most abundant. The color-code for phyla is as in Fig. 2B.

193

Supplemental Table 3: 16S rRNA (V3-V4) based abundances of 43 bacterial families that are amongst the top 15 in at least one of the 12 data-series (used for figure 2B).

| Taxon                                                                 | Phylum        | Family             | Averaged abundance | Data series |
|-----------------------------------------------------------------------|---------------|--------------------|--------------------|-------------|
| Bacteria;Bacteroidetes;Bacteroidia;Bacteroidales;Paraprevotellaceae   | Bacteroidetes | Paraprevotellaceae | 0.109390596        | F6_CC       |
| Bacteria;Bacteroidetes;Bacteroidia;Bacteroidales;Prevotellaceae       | Bacteroidetes | Prevotellaceae     | 0.097737987        | F6_CC       |
| Bacteria;Firmicutes;Clostridia;Clostridiales;Ruminococcaceae          | Firmicutes    | Ruminococcaceae    | 0.087122887        | F6_CC       |
| Bacteria;Firmicutes;Clostridia;Clostridiales;Lachnospiraceae          | Firmicutes    | Lachnospiraceae    | 0.08153471         | F6_CC       |
| Bacteria;Bacteroidetes;Bacteroidia;Bacteroidales;Bacteroidaceae       | Bacteroidetes | Bacteroidaceae     | 0.053424685        | F6_CC       |
| Bacteria;Spirochaetes;Spirochaetes;Sphaerochaetales;Sphaerochaetaceae | Spirochaetes  | Sphaerochaetaceae  | 0.038308145        | F6_CC       |
| Bacteria;Bacteroidetes;Bacteroidia;Bacteroidales;RF16                 | Bacteroidetes | RF16               | 0.03501472         | F6_CC       |
| Bacteria;Firmicutes;Clostridia;Clostridiales;Veillonellaceae          | Firmicutes    | Veillonellaceae    | 0.031823326        | F6_CC       |
| Bacteria;Bacteroidetes;Bacteroidia;Bacteroidales;Porphyromonadaceae   | Bacteroidetes | Porphyromonadaceae | 0.03073182         | F6_CC       |
| Bacteria;Spirochaetes;Spirochaetes;Spirochaetales;Spirochaetaceae     | Spirochaetes  | Spirochaetaceae    | 0.024133387        | F6_CC       |
| Bacteria;Firmicutes;Clostridia;Clostridiales;Clostridiaceae           | Firmicutes    | Clostridiaceae     | 0.020539321        | F6_CC       |
| Bacteria;Bacteroidetes;Bacteroidia;Bacteroidales;S24-7                | Bacteroidetes | S24-7              | 0.019756632        | F6_CC       |

194

195 (12 first rows only)

196

197 **Evaluating the heritability of intestinal microbiome composition in the mosaic pig**  
198 **population.**

199 To evaluate to what extent individual genotype contributes to the observed  $\beta$ -diversity (i.e.

200 measure the heritability of microbiota composition), we regressed pair-wise Bray-Curtis

201 dissimilarity on pair-wise kinship coefficient measured from genome-wide SNP data



202 (Rothschild et al., 2018). We first performed analyses within litter following Visscher et al.  
203 (2006). There is no reason to assume that litter-mates that are genetically more similar to  
204 each other would also be exposed to more similar environmental effects. Hence, a significant  
205 negative correlation between genetic similarity and microbiome dissimilarity within litter is  
206 strong evidence for an effect of genetics on microbiome composition. Correlations were  
207 measured separately for the 12 measured data series (day 25, day 120, day 240 fecal samples  
208 (F6 & F7), ileal and cecal content (F6 & F7), and ileal and cecal mucosae (F7)). The number of  
209 litters per analysis averaged 90 (range: 18 to 156), while the number of full-sib pairs per  
210 analysis averaged 587 (range: 109 – 1,215). The range of kinship and Bray-Curtis dissimilarity  
211 values may differ between litters, whether by chance, as a result of idiosyncrasies of the  
212 parental SNP genotypes, and/or of differences in environmental conditions between litters,  
213 and this may inflate the correlations (both up and down-wards). Thus, we evaluated the  
214 statistical significance of the observed correlations by performing 1,000 permutations of  
215 kinship coefficients and Bray-Curtis dissimilarities within litter. The correlations were negative  
216 for the 12 analyzed traits, and below the 50ties percentile of the permutation values for 11  
217 of 12 ( $p = 0.0029$ ) (not in IM which has one of the smallest  $n$ ). The empirical  $p$ -value (one-  
218 sided) of the correlation was  $\leq 0.05/12=0.004$  (Bonferroni corrected threshold) for two (D240  
219 in F6 and F7, which have large  $n$ ). We combined the  $p$ -values across the 12 data series by  
220 summing the ranks of the observed correlations and computing the probability of this sum  
221 (one-sided) under the null hypothesis by simulation (see Methods) yielding an overall  $p$ -value  
222 of  $3 \times 10^{-4}$ , hence providing a first line of evidence for an effect of genetics on microbiome  
223 composition in this population (Fig. 3A).

224 We performed the same correlation analysis between genome-wide kinship and microbiome  
225 dissimilarity across the F6 and F7 generations (raised respectively in 2016 and 2017) for the  
226 five traits that were measured in both cohorts. None of the F6-F7 pairs considered included  
227 parent-offspring pairs (the microbiome of F6 sows may determine the microbiome of F7  
228 offspring independently of genetics). The number of pairs in the across-generation analyses  
229 averaged 176,405 (range: 18,792 – 367,824). For the reasons described above, the statistical  
230 significance of the correlations was determined by 1,000 permutations performed within F6  
231 and F7 litters (see Methods). The correlation was negative and below the 50-ties percentile  
232 of the permutation values for the five analyzed traits ( $p = 0.03$ ). The empirical  $p$ -value (one-  
233 sided) of the correlation was  $\leq 0.05/5=0.01$  (Bonferroni corrected threshold) for one (D240

234 which has largest n). The combined p-value for the five traits combined and computed as  
235 above was 0.013, hence providing a second line of evidence for an effect of genetics on  
236 microbiome composition in this population (Fig. 3B).

237 We then evaluated the heritability ( $h^2$ ) of the abundances of individual taxa using a mixed  
238 model. This was done for up to 29 phyla, 53 classes, 86 orders, 116 families, 148 genera and  
239 4,240 OTUs per data series. Heritabilities were estimated using a mixed model implemented  
240 with GEMMA (Zhou & Stephens, 2012). The model included random polygenic and residual  
241 error effects. Kinship coefficients (to constrain the polygenic effect) were computed from  
242 whole-genome SNP data, also using GEMMA (Zhou & Stephens, 2012). To obtain unbiased  
243  $h^2$  estimates and associated p-values, we repeated the analysis 1,000 times with abundances  
244 randomly permuted within litter. The average  $h^2$  across the permutations was then  
245 subtracted from the  $h^2$  obtained with the unpermuted data to yield conservative estimates  
246 of  $\widehat{h^2}$ . Their p-values were estimated as the proportion of permutations yielding an equally  
247 high or higher  $h^2$  estimate. Analyses were conducted for the 12 measured data series. P-  
248 values were  $\leq 0.05$  for 4,219 (=14%) of the 30,127 realized tests, hence above random  
249 expectations (Suppl. Table 4). The correlation between F6 and F7  $\widehat{h^2}$  estimates (or their  
250  $\log(1/p)$  values) were positive and highly significant ( $p \leq 1.1 \times 10^{-30}$  and  $1.07 \times 10^{-17}$ , respectively)  
251 for D240 fecal samples, hence supporting genuine genetic effects at least for this trait (Suppl.  
252 Fig. 2A). Averaged (over F6 and F7) heritabilities of individual taxa tended to be higher for  
253 fecal samples (especially at D240) than for content traits (Fig. 3C). Accordingly, total  
254 heritabilities computed following Rothschild et al. (2018) were highest for D240 fecal samples  
255 (5.09%) (Suppl. Fig. 2B). We compared the average heritabilities of individual taxa in D240  
256 fecal samples with heritabilities of individual taxa in human feces (Goodrich et al., 2016).  
257 There was no significant correlation between pig and human values when considering all taxa.  
258 It is noteworthy, however, that the taxon found to be the most heritable in human, the family  
259 *Christensenellaceae* (Goodrich et al., 2014&2016), was also amongst the most heritable in  
260 pigs. At least seven other taxa were found to be heritable in both human and porcine adult  
261 feces (Fig. 3D).

262

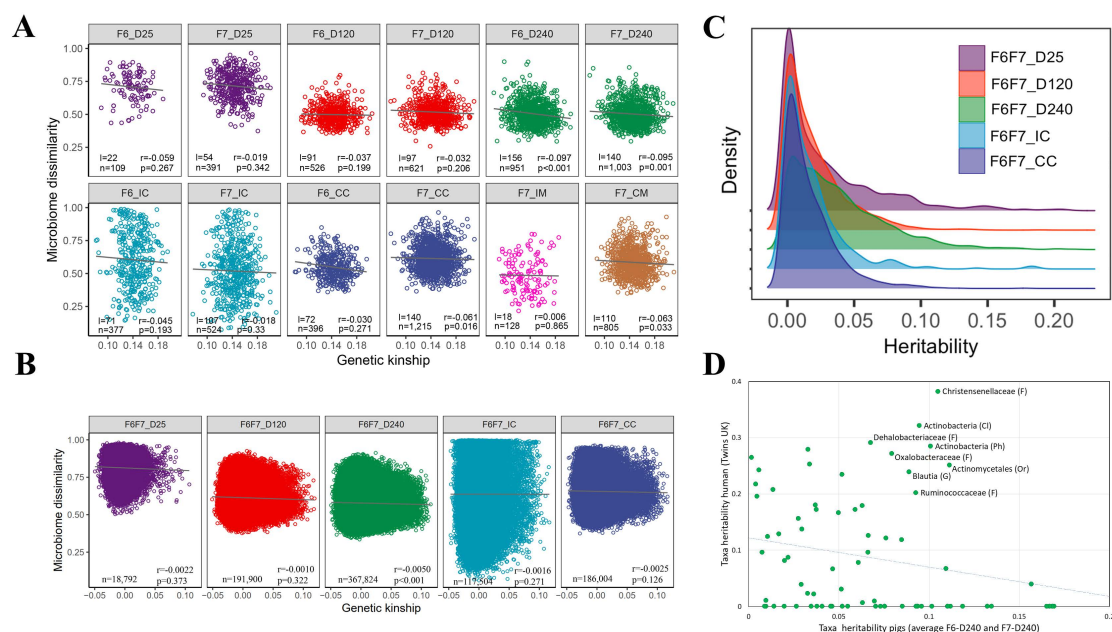

263

264 **Figure 3: (A) Correlation between genome-wide kinship ( $\Theta$ ) and microbiome dissimilarity**

265 **(Bray-Curtis distance) within litter.** Correlations were measured separately for the 12 data

266 series. P-values (one-sided  $p$ ) were computed using a permutation test. Spearman's

267 correlations ( $r$ ) were computed in R and adjusted to match the permutation  $p$ -values (see

268 Methods). The number of litters ( $l$ ) and animal pairs ( $n$ ) used for analysis are given for each

269 data series. **(B) Correlation between genome-wide kinship ( $\Theta$ ) and microbiome dissimilarity**

270 **(Bray-Curtis distance) across generations.** We considered all possible pairs of F6 and F7

271 animals (ignoring sow-offspring pairs), hence considerably increasing sample size when

272 compared to (A). Analyses were conducted for the five traits measured in both F6 and F7.  $r$ ,

273  $p$ , and  $n$  are as in (A). **(C) Frequency distribution of heritabilities of individual taxa** for fecal

274 samples (D25, D120 and D240) and intestinal content samples (IC and CC). Values are F6 and

275 F7 averages. **(D) Correspondence between taxa heritabilities in human and pig adult fecal**

276 **samples.**

277

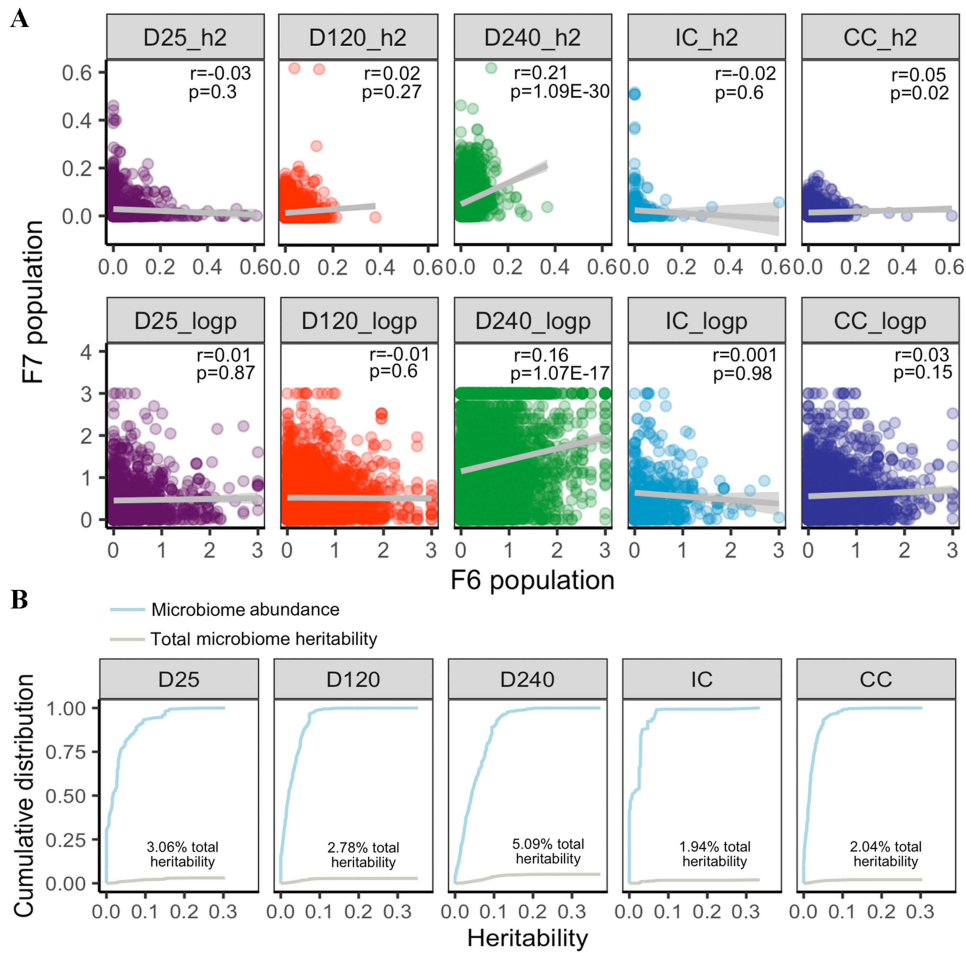

278

279 **Suppl. Fig. 2: (A)** Correlation between heritabilities (upper row) and associated log(1/p)  
 280 values (lower row) of abundance of individual taxa between the F6 and F7 generations.  
 281 Correlation coefficients (r) and corresponding p-values (p) are given. **(B)** Total heritabilities  
 282 computed following Rothschild et al. (2018) using heritabilities of individual taxa averaged  
 283 over the F6 and F7 generations for the five shared traits.

**Supplemental Table 4:** Heritabilities of individual taxa for the 12 analyzed dataseries or traits.

| Data series / Trait | Taxon    | Annotation                                                                          | Uncorrected | Permutation | Corrected | p-value  | q-value  |
|---------------------|----------|-------------------------------------------------------------------------------------|-------------|-------------|-----------|----------|----------|
|                     |          |                                                                                     | $h^2$       | $h^2$       | $h^2$     |          |          |
| F6_CC               | Otu15777 | Bacteria;Firmicutes;Clostridia;Clostridiales;Ruminococcaceae;Ruminococcus           | 0.155       | 0.043       | 0.112     | 0.00E+00 | 0.00E+00 |
| F6_CC               | Otu28641 | Bacteria;Firmicutes;Clostridia;Clostridiales;Ruminococcaceae;Ruminococcus           | 0.210       | 0.128       | 0.082     | 0.00E+00 | 0.00E+00 |
| F6_CC               | Otu653   | Bacteria;Bacteroidetes;Bacteroidia;Bacteroidales                                    | 0.084       | 0.004       | 0.080     | 0.00E+00 | 0.00E+00 |
| F6_CC               | Otu654   | Bacteria;Bacteroidetes;Bacteroidia;Bacteroidales;Porphyromonadaceae                 | 0.130       | 0.047       | 0.083     | 0.00E+00 | 0.00E+00 |
| F6_CC               | Otu7355  | Bacteria;Firmicutes;Clostridia;Clostridiales;Ruminococcaceae                        | 0.234       | 0.071       | 0.163     | 0.00E+00 | 0.00E+00 |
| F6_CC               | Otu7838  | Bacteria;Firmicutes;Clostridia;Clostridiales;Ruminococcaceae;Oscillospira           | 0.319       | 0.165       | 0.153     | 0.00E+00 | 0.00E+00 |
| F6_CC               | Otu10305 | Bacteria;Bacteroidetes;Bacteroidia;Bacteroidales;Porphyromonadaceae;Parabacteroides | 0.157       | 0.047       | 0.110     | 1.00E-03 | 2.05E-01 |
| F6_CC               | Otu16289 | Bacteria;Cyanobacteria;4C0d-2;YS2                                                   | 0.240       | 0.145       | 0.095     | 1.00E-03 | 2.05E-01 |
| F6_CC               | Otu2033  | Bacteria;Firmicutes;Clostridia;Clostridiales                                        | 0.192       | 0.048       | 0.144     | 1.00E-03 | 2.05E-01 |
| F6_CC               | Otu3738  | Bacteria;Spirochaetes;Spirochaetes                                                  | 0.286       | 0.121       | 0.165     | 1.00E-03 | 2.05E-01 |
| F6_CC               | Otu6981  | Bacteria;Firmicutes;Clostridia;Clostridiales;Ruminococcaceae                        | 0.240       | 0.128       | 0.112     | 1.00E-03 | 2.05E-01 |
| F6_CC               | Otu16266 | Bacteria;Cyanobacteria;4C0d-2;YS2                                                   | 0.165       | 0.057       | 0.108     | 2.00E-03 | 3.01E-01 |

284

285 (12 first rows only)

286

287

288 **Identifying a microbiota QTL with major effect on the abundance of *Erysipelotrichaceae***  
289 **species by whole genome sequence based GWAS**

290 Having established that host genetics affects intestinal microbiome composition in our  
291 population, we sought to identify contributing loci by performing GWAS. GWAS were initially  
292 performed separately by trait, taxon and generation, and conducted using two statistical  
293 models following Turpin et al. (2016). The first model analyzed the effect of individual SNPs  
294 on log<sub>10</sub>-transformed taxa abundance using a linear model. It was applied to all taxa present  
295 in ≥ 20% of individuals and SNPs with MAF ≥ 5% in the corresponding data series. The  
296 second model tested the effect of individual SNPs on the presence versus absence of the  
297 corresponding taxon using a logistic regression model. This model was applied only to taxa  
298 present in ≥ 20% and ≤ 95% of individuals and SNPs with MAF ≥ 10% (as the test statistic  
299 was inflated under the null when using this model with 5% < MAF < 10%; Suppl. Fig. 3A) (Suppl.  
300 Table 5). Both models were implemented with the GenABEL R package (Aulchenko et al., 2007)  
301 and included sex, batch and the three first genomic principal components as fixed covariates.  
302 P-values were further adjusted for residual stratification by genomic control. We obtained  
303 1,527 signals encompassing at least three variants with  $p$  value ≤  $5 \times 10^{-8}$  (the standard  
304 genome-wide significance threshold). To evaluate whether this number exceeded  
305 expectations assuming that all tests were null hypotheses, we performed two analyses. In  
306 the first we chose one of the largest (hence best powered) data series (day 240 feces in the  
307 F7 generation) and repeated all GWAS on a dataset with permuted (within litter) genotype  
308 vectors. The number of microbiota QTL (mQTL) signals detected with the real dataset was  
309 221, while the number detected with the permuted dataset was 152, hence suggesting a true  
310 discovery rate of ~30%. In the second, we collected – for each of the 1,527 signals with  $p$ -  
311 value(s) ≤  $5 \times 10^{-8}$  described above (corresponding each to a lead SNP x taxon x trait x  
312 cohort x model combination) – the  $p$ -values for the same SNP x taxon x model combination,  
313 yet for all other trait x other cohort combinations. Thus, we would typically collect ~5-7  $p$ -  
314 values for each such signal. We reasoned that if the initial signals included a sufficient  
315 proportion of true positives, the lead SNPs would have similar effects in at least some of the  
316 traits in the other cohort and the collected  $p$ -values concomitantly shifted to low values. The  
317 corresponding distribution of  $p$ -values was examined by means of a QQ-plot, and was  
318 compared with the distribution obtained with an equivalent number of randomly selected  
319 series of 5-7  $p$ -values (matched for SNP MAF and taxa abundance). This revealed a strong

320 shift towards low p-values when compared to controls for the analyses based on abundance  
321 (rather than presence vs absence), providing additional evidence for the occurrence of real  
322 mQTL in our data (Fig. 4A). Of note, the average (F6 and F7) number of genome-wide  
323 significant mQTL was positively correlated with the average (F6 and F7) taxon's heritability,  
324 particularly for D240 fecal samples ( $p = 5.2 \times 10^{-6}$ ) (Suppl. Fig. 3B).

325 To identify the corresponding mQTL yet properly accounting for the large number of realized  
326 tests before declaring experiment-wide significance and simultaneously provide confirmation  
327 in an independent cohort, we performed meta-analyses (across traits) separately in the F6  
328 and F7 generations for the 1,527 above-mentioned signals. We designed an empirical meta-  
329 analysis approach that accounts for phenotypic correlation across traits if it exists (cfr.

330 Methods). The discovery threshold was set at  $\frac{0.05}{10^6 \times 1,527 \times 2 \times 2} = 8.2 \times 10^{-12}$  hence corrected

331 for the size of the genome, the number of tested taxa (because genome-wide significant), the  
332 two used statistical models, and the two studied cohorts (F6 and F7). There was no need to

333 correct for the number of traits as the meta-analysis generated one statistic for all traits. The

334 confirmation threshold was set at  $0.05/n$  where  $n$  was the number of signals exceeding the

335 discovery threshold in at least one cohort. Thus, we searched for signals (defined as lead SNP

336 x taxon x method combinations) that would exceed the discovery threshold in either the F6

337 or F7 cohort and the confirmation threshold in the other. We identified seven signals

338 exceeding the discovery threshold in at least one cohort, hence setting  $n$ . For six of those,

339 the confirmation threshold (i.e.  $0.05/7=0.007$ ) was also exceeded in the other cohort. All of

340 these mapped within 3,037 bp from each other on chromosome 1 (between positions

341 272,904,923 and 272,907,960). They affected two individual OTUs (OTU-476 and OTU-327)

342 as well as genus p-75-a5 to which OTU-476 is assigned (Suppl. Table 6). P-75-a5 contains 31

343 OTUs (other than OTU-476) that were present in  $\geq 20\%$  of samples for at least one trait. All

344 three (OTU-476, OTU-327 and p-75-a5) are part of the *Erysipelotrichaceae* family, which

345 contains a total of 116 OTUs subjected to GWAS. To better characterize the identified mQTL,

346 we reran GWAS for OTU-476 and OTU-327 separately in the F6 and F7 populations (using all

347 SNPs). The results of the corresponding association analyses are shown in Fig. 4B&C. The

348 top SNPs on chromosome 1 (OTU-476: 1\_272905215 and 1\_272907239, OTU-327:

349 1\_272908083 and 1\_272905713) mapped 2,869 base pairs apart, providing a quantitative

350 estimate of the mapping accuracy. The four SNPs were in high linkage disequilibrium with

351 each other in both F6 and F7 populations as expected (Fig. 4D). To determine whether the  
 352 corresponding mQTL might affect other taxa, we plotted the F6 and F7 association  $\log(1/p)$   
 353 values for SNP 1\_272907239 and the 7,748 studied OTUs. OTU-476 and OTU-327 were clearly  
 354 standing out as being highly significant in both F6 and F7 (Fig. 4E). Yet the p-values for the  
 355 31 other p-75-a5 OTUs and the 83 (= 116-31-2) other *Erysipelotrichaceae* OTUs were  
 356 significantly shifted towards lower p-values (Fig. 4F) with sign consistent with that for OTU-  
 357 476, OTU-327 and p-75-a5 in both F6 and F7 (Suppl. Fig. 3C), suggesting that the chromosome  
 358 1 mQTL also affects other species in this family.  
 359

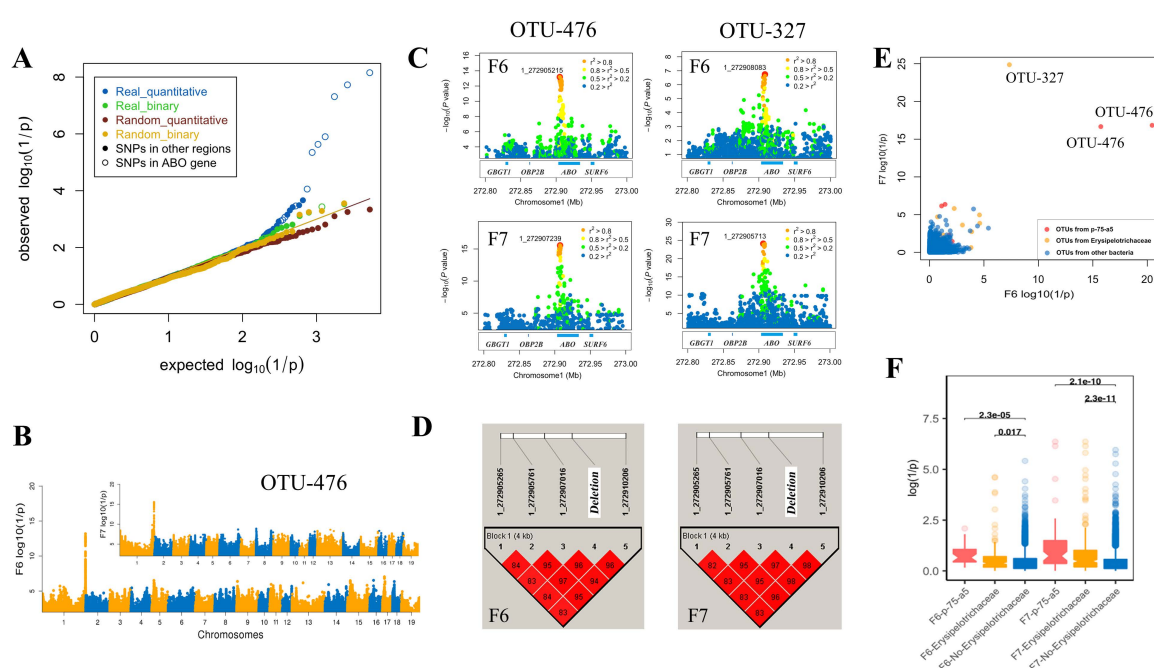

360  
 361 **Figure 4:** (A) QQ plot for 1,527 (number of signals (SNP x taxon x model x one data series in  
 362 one cohort) exceeding the genome-wide  $\log(1/p)$  threshold value of 7.3) sets of  $5-7 \leq p$ -  
 363 values (same SNP x taxon x model, all data series in the other cohort) for real SNPs (Blue:  
 364 quantitative model; Green: binary model), and matched sets of  $\leq 5-7$  p-values corresponding  
 365 to randomly selected SNP x taxon combinations matched for MAF and abundance or  
 366 presence/absence rate (Brown: quantitative model; Yellow: binary model). (B) Result of  
 367 genome-wide meta-analysis in the F6 and F7 generation for OTU-476 (Manhattan plot). (C)  
 368 Local zooms (chromosome 1: 272.8-273Mb) for OTU-476 and OTU-327 in F6 and F7. (D)  
 369 Linkage disequilibrium ( $r^2$ ) between the four top SNPs and the 2.3Kb ABO deletion in the F6  
 370 and F7 populations (see Fig. 5). (E)  $\log(1/p)$  values in F6 (x-axis) and F7 (y-axis) generations

371 for association between SNP 1\_272907239 genotype and abundance of 7,748 OTUs for all  
 372 studied traits and used analyses methods. OTUs that belong to p-75-a5 (respectively  
 373 *Erysipelotrichaceae*) are shown in red (respectively yellow). **(F)** Comparing the distribution of  
 374 association (1\_272907239) p-values for p-75-a5 and *Erysipelotrichaceae* OTUs with other  
 375 OTUs in F6 and F7.

376

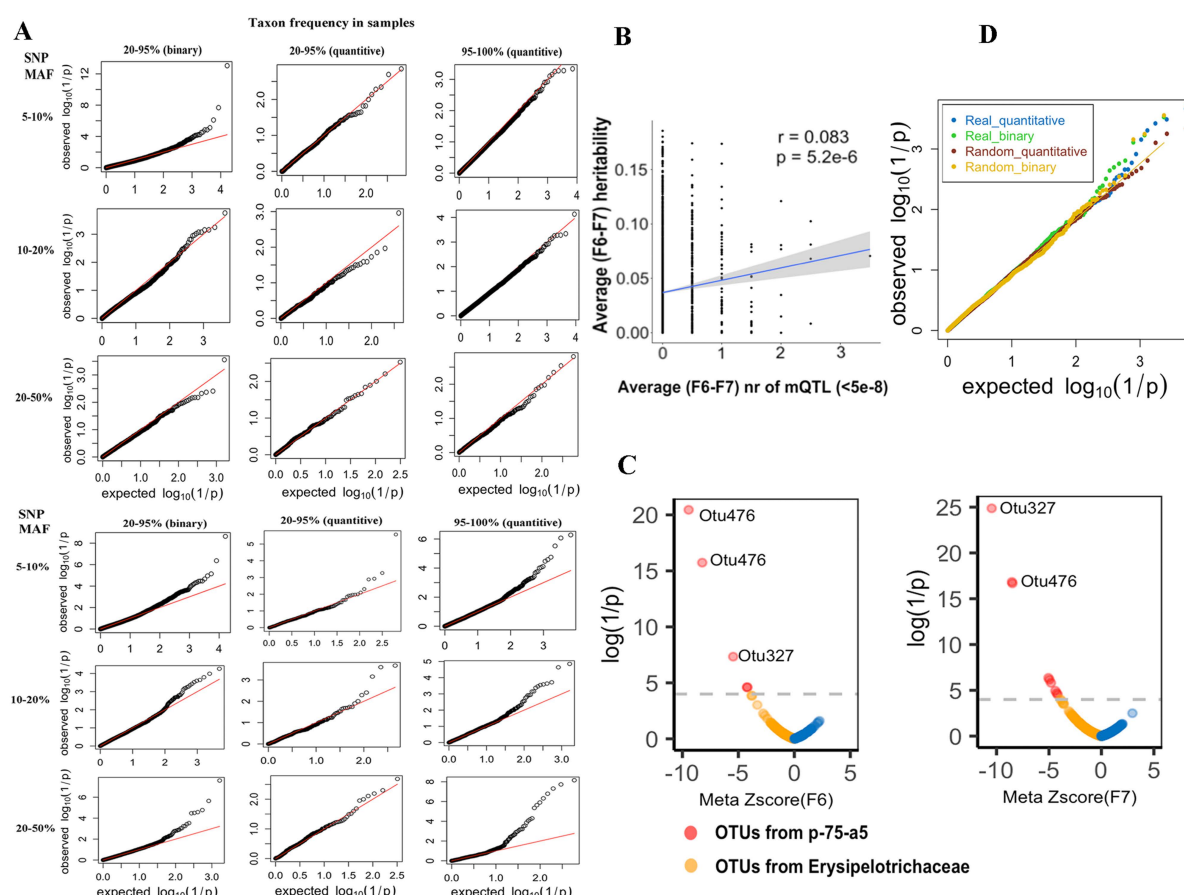

377

378 **Suppl. Fig. 3: (A) (Upper)** Distribution of  $\log(1/p)$  values for 1,527 sets of 11 p-values obtained  
 379 in 11 data-series for a SNP x taxon x analysis model combination that yielded a genome-wide  
 380 significant signal ( $p < 5 \times 10^{-8}$ ) in the 12<sup>th</sup> data-series. **(Lower)** Distribution of  $\log(1/p)$  values  
 381 for 1,527 sets of 11 p-values obtained in the same data-series and with the same analysis  
 382 model as in (upper) but with randomly selected SNP x taxon combinations matching the ones  
 383 in (upper) for MAF and taxa abundance. **(B)** Correlation between the average (F6 and F7)  
 384 taxon heritability, and the average (F6 and F7) number of genome-wide significant ( $p \leq$   
 385  $5 \times 10^{-8}$ ) mQTL for D240 fecal samples. **(C)** Distribution of the association  $\log(1/p)$  values  
 386 and corresponding signed z-scores for SNP 1\_272907239 and 31 p-75-a5 OTUs (red) and 83  
 387 *Erysipelotrichaceae* OTUs, showing an enrichment of effects with same sign as for OTU-476



388 and OTU-327. **(D)** Same QQ plot as in Fig. 4A after removal of all SNPs in the chromosome 1:  
 389 272.8-273.1Mb interval.

390

**Supplemental Table 5:** Number of SNPs and taxa used for mQTL analyses in the different data series

| Generation | Data series | Sample type   | Sample size | Quantitative model     |                            |                       | Binary model            |                      |
|------------|-------------|---------------|-------------|------------------------|----------------------------|-----------------------|-------------------------|----------------------|
|            |             |               |             | Nr SNPs<br>(MAF >= 5%) | Nr taxa<br>(20% < F < 95%) | Nr taxa<br>(F >= 95%) | Nr SNPs<br>(MAF >= 10%) | Nr taxa<br>(F > 20%) |
| F6         | D25         | Feces         | 81          | 25,725,345             | 1,372                      | 132                   | 20,477,556              | 1,372                |
|            | D120        | Feces         | 475         | 26,572,513             | 2,519                      | 372                   | 20,814,322              | 2,519                |
|            | D240        | Feces         | 633         | 26,634,424             | 3,246                      | 375                   | 20,761,630              | 3,246                |
|            | IC          | Ileal content | 288         | 26,660,960             | 869                        | 68                    | 20,733,869              | 869                  |
|            | CC          | Cecum content | 292         | 25,513,317             | 1,983                      | 275                   | 20,698,139              | 1,983                |
| F7         | D25         | Feces         | 232         | 26,517,529             | 1,731                      | 95                    | 20,730,691              | 1,731                |
|            | D120        | Feces         | 405         | 26,540,167             | 4,055                      | 290                   | 20,694,289              | 4,055                |
|            | D240        | Feces         | 582         | 26,562,071             | 4,124                      | 349                   | 20,645,179              | 4,124                |
|            | IC          | Ileal content | 408         | 26,623,600             | 499                        | 55                    | 20,677,324              | 499                  |
|            | IM          | Ileal mucosa  | 76          | 25,756,486             | 1,606                      | 256                   | 20,356,739              | 1,606                |
|            | CC          | Cecal content | 637         | 26,632,837             | 3,762                      | 205                   | 20,652,282              | 3,762                |
|            | CM          | Cecal mucosa  | 483         | 26,591,809             | 1,664                      | 225                   | 20,676,604              | 1,664                |

391

392

**Supplemental Table 6:** Signals exceeding the experiment-wise significance threshold in at least one cohort.

| Taxon                         | SNP         | meta-p-value |          |
|-------------------------------|-------------|--------------|----------|
|                               |             | F6           | F7       |
| Otu327(f_Erysipelotrichaceae) | 1_272907960 | 2.55E-06     | 5.24E-24 |
| g_p-75-a5                     | 1_272907573 | 5.84E-04     | 3.81E-17 |
| g_p-75-a5                     | 1_272907165 | 3.05E-12     | 2.76E-16 |
| Otu16389(k_Bacteria)          | 6_169188720 | 6.19E-01     | 1.78E-15 |
| Otu476(g_p-75-a5)             | 1_272907573 | 1.47E-04     | 4.57E-15 |
| Otu476(g_p-75-a5)             | 1_272907165 | 1.12E-13     | 1.38E-14 |
| Otu476(g_p-75-a5)             | 1_272904923 | 1.54E-14     | 8.76E-14 |

393

394 (showing top signals only)

395

396 **The chromosome 1 mQTL is caused by a 2.3-Kb deletion in the ABO acetyl-galactosaminyl-**  
 397 **transferase gene that is under balancing selection.**

398 All lead SNPs of the meta-analyses conducted in the F6 and F7 generation map to the 3' end  
 399 of the porcine acetyl-galactosaminyl transferase gene that is orthologous to the gene  
 400 underlying the ABO blood group in human (Fig. 4B). This is a strong candidate gene known to  
 401 modulate interactions with several pathogens (Cooling et al., 2015), although not directly  
 402 known to affect intestinal microbiota composition in healthy humans (Davenport et al., 2016).  
 403 Four non-synonymous ABO SNPs (*R37G*, *A48P*, *S60R*, *G66C*) segregated in the F6 and F7  
 404 generation but none of these were in high LD with any of the lead SNPs ( $r^2 \leq 0.18$ ). A 2.3

405 Kb deletion encompassing the last exon (eight) of the acetyl-galactosaminyl transferase gene  
406 has been previously reported in the pig. It causes a null allele equivalent to human “O”, while  
407 the wild-type allele corresponds to the human “A” allele with alpha 1-3-N-acetyl-  
408 galactosaminyl-transferase activity (Choi et al., 2018). The pig *Sus scrofa* 11.1 reference  
409 genome corresponds to the “O” allele. We de novo assembled an “A” allele using PacBio  
410 whole genome sequence data from one of our Bamaxiang animals. We confirmed the  
411 boundaries of the 2.3 Kb deletion and showed that it results from an intra-chromosomal  
412 recombination between SINE elements (Fig. 5A and Suppl. Fig. 4A). The four top SNPs in Fig.  
413 4D mapped within 2.1 Kb from the 2.3Kb deletion. We developed a PCR test and genotyped  
414 all F0, F6 and F7 animals for the “O” deletion. Three of the four top SNPs were in perfect LD  
415 with the deletion in the F0 generation and near-perfect ( $r^2 \geq 0.94$ ) in the F6 and F7  
416 generations (Fig. 4D). None of the four non-synonymous ABO variants had an independent  
417 effect on OTU-476 or 327 abundance. We mapped cecal RNA-Seq data from AA, AO and OO  
418 individuals on the Bamaxiang A reference allele. Transcripts from the AA individuals showed  
419 the expected splicing pattern yielding an ~1.25 Kb mRNA coding for 364 amino-acid of which  
420 230 (63%) by exon 8. Transcripts from OO individuals were characterized by the use of an  
421 alternative 70 bp eighth and 6.9 Kb ninth exon flanked by canonical splice sites (Fig. 5A). The  
422 corresponding 7.4 Kb mRNA substitutes the 230 amino-acids encoded by the wild-type eight  
423 exon with a shortened lysine-serine-isoleucine carboxyterminal tail. The encoded truncated  
424 protein misses seven of the eight substrate binding sites and seven of the eight active sites  
425 reported by Wang et al. (2015). The proportion of reads mapping to the seventh intron was  
426 higher for the O than for the A allele pointing towards less efficient splicing of the alternative  
427 intron. We used three synonymous variants in LD with the 2.3 Kb deletion (mapping  
428 respectively in exons 4, 6 and 7) to measure allelic imbalance from RNA-Seq data of AO  
429 individuals. O transcripts accounted for 26% of acetyl-galactosaminyl transferase transcripts  
430 in AO individuals, possibly reflecting non-sense mediated RNA decay due to a stop codon in  
431 the penultimate exon (Fig. 5 and Suppl. Fig. 4B). This ~3-fold reduction in abundance of O  
432 versus A transcripts was confirmed by expression QTL (eQTL) analysis performed using RNA-  
433 Seq data from 300 F7 cecum tissues samples ( $p = 1.9 \times 10^{-43}$ ) (Suppl. Fig. 4C). Taken together,  
434 our results indicate that the 2.3 Kb “O” deletion is a null allele and the most likely mQTL  
435 causative mutation.

436 We closely examined the effect of AO genotype on the abundance of the affected OTUs (OTU-  
437 476, OTU-327 and p-75-a5) in the 12 data series. This clearly showed (i) that the effect of the  
438 A allele is dominant over that of the O allele, and (ii) that the effect manifests in D120 and  
439 D240 feces, cecal content as well as mucosa, but not in D25 feces, ileal content and mucosa  
440 (Fig. 5B and Suppl. Fig. 4D). In these samples (D120, D240, CC, CM), AO genotype explained  
441 on average 7.9%, 3.2% and 6.6% of the variance in abundance for OTU-476, OTU-327 and  
442 genus p-75-a5 (Suppl. Fig. 4E). Of note, the abundance of OTU-476 and OTU-327 was shown  
443 to be highest in cecal content where they account on average for respectively ~0.92% and  
444 ~0.02% of reads in AA/AO animals, and for 0.47% and 0.003% of reads in OO animals (Fig. 5  
445 and Suppl. Fig. 4F).

446 The ABO locus is known in humans to be under strong balancing selection that has  
447 perpetuated identical-by-descent alleles segregating in present humans, gibbons and Old-  
448 World monkeys for tens of millions of years (Ségurel et al., 2012). To verify whether a similar  
449 situation might occur in pigs, we analyzed the sequences of the 61 F0 animals (*Sus scrofa*  
450 *domestica*), 15 wild boars (9 Asian, 7 European)(*Sus scrofa*), one Indonesian wild boar from  
451 Sumatra (*Sus scrofa vittatus*), one Visayan warty pig from the Philippines (*Sus cebifrons*), one  
452 Javan warty pig from Indonesia (*Sus verrucosus*), and one common warthog from Africa  
453 (*Phacochoerus africanus*) in a 50 Kb window spanning the ABO gene. Asian and European  
454 wild boar (and derived domestic breeds) are thought to have diverged from a common *Sus*  
455 *scrofa* ancestor ~1 million years ago (MYA), *Sus scrofa* and *Sus scrofa vittatus* ~1.5 MYA, *Sus*  
456 *scrofa* and *Sus cebifrons/verrucosus* ~3.5 MYA, and *Sus scrofa* and *Phacochoerus africanus*  
457 ~10 MYA (Groenen, 2016). The same (identical breakpoints) 2.3Kb deletion was shown to  
458 segregate in all eight F0 breeds, in all Asian and European/American wild-boar populations,  
459 and – remarkably – in *Sus cebifrons* (Fig. 5C). Consistent with the hypothesis of a trans-  
460 species polymorphism (rather than hybridization), the O allele of *Sus cebifrons* was shown to  
461 lie outside of the cluster of *Sus scrofa* O alleles (Fig. 5D). Further supporting the hypothesis  
462 of balancing selection, the ABO gene was characterized by a marked drop in population  
463 differentiation between domestic pig breeds maximizing exactly at the position of the 2.3 Kb  
464 deletion (Fig. 5E).

465

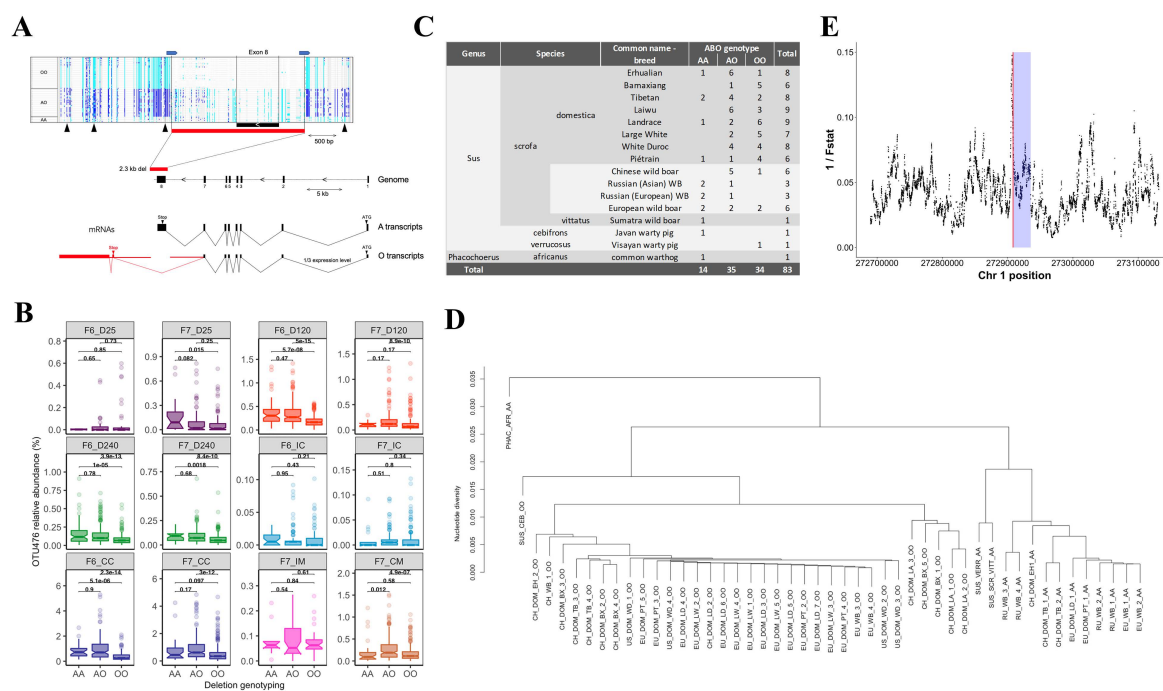

466

467 **Figure 5: (A) Structure of the porcine ABO acetyl-galactosaminyl transferase gene with**

468 **position of the 2.3 Kb deletion (red rectangle).** Screen capture of Integrated Genome Viewer

469 (IGV) view of the genotypes of the 61 F0 animals (sorted by OO, AO and AA genotype) for 145

470 variants in a ~5 Kb interval spanning the 2.3 Kb deletion. Sequence reads were mapped to

471 the Bamaxiang A allele as reference. Light blue: homozygous for alternate allele; dark blue:

472 heterozygous alternate/reference; gray: homozygous for reference allele. The horizontal

473 blue arrows mark the position of SINE sequences that may have mediated the intra-

474 chromosomal recombination event that has created the 2.3 Kb deletion. The vertical black

475 arrow mark the position of the top variants reported in Fig. 4C. Effect of the 2.3Kb deletion

476 on the structure and abundance of acetyl-galactosaminyl transferase transcripts: (i) creation

477 of alternate exon 8 and 9, and (ii) reduction of transcript levels to ~ 1/3th of normal levels.

478 **(B) Effect of acetyl-galactosaminyl transferase genotype (AA, AO or OO) on abundance of**

479 **OTU-476 in the twelve data series** showing that (i) the effect of the A allele is dominant over

480 that of the O allele, and (ii) the mQTL effect is detected in cecum (content and mucosa) and

481 in day 120 and 240 feces. **(C) The AO acetyl-galactosaminyl transferase polymorphism is a**

482 **trans-species polymorphism in Suidae.** Distribution of the AO genotype in domestic *S. scrofa*

483 (domestic pigs), wild *S. scrofa* (wild boars), *S. verrucosus* (Visayan warty pig), *S. cebifrons*

484 (Javan warty pig), and *Phacochoerus Africanus* (common warthog). **(D) UPGMA dendrogram**

485 based on sequence similarity between the chromosomes of 14 homozygous AA and 34 OO

486 animals in a 5-Kb window centered around the 2.3Kb deletion (variants inside the deletion  
 487 were ignored). PHAC\_AFR: common warthog, SUS\_VERR: Visayan warty pig, SUS\_CEB: Javan  
 488 warty pig, SUS\_SCR\_VII: Sumatran wild boar, CH/RU/EU\_WB: Chinese/Russian/European wild  
 489 boars, CH/EU/AM\_DOM: Chinese/European/American domestic pigs. Breed acronyms are as  
 490 in Fig. 1. **(E) Peak of reduced population differentiation between eight domestic breeds**  
 491 **coinciding with the 2.3 Kb deletion (red) in the porcine acetyl-galactosaminyl transferase**  
 492 **gene (blue).** X-axis: position on porcine chromosome 1. Y-axis: 1/(mean F statistic) for all  
 493 variants in a 2Kb sliding window. F statistic computed as the ratio of the “between-breed  
 494 mean squares” and the “within-breed mean squares” for the dosage of O allele.

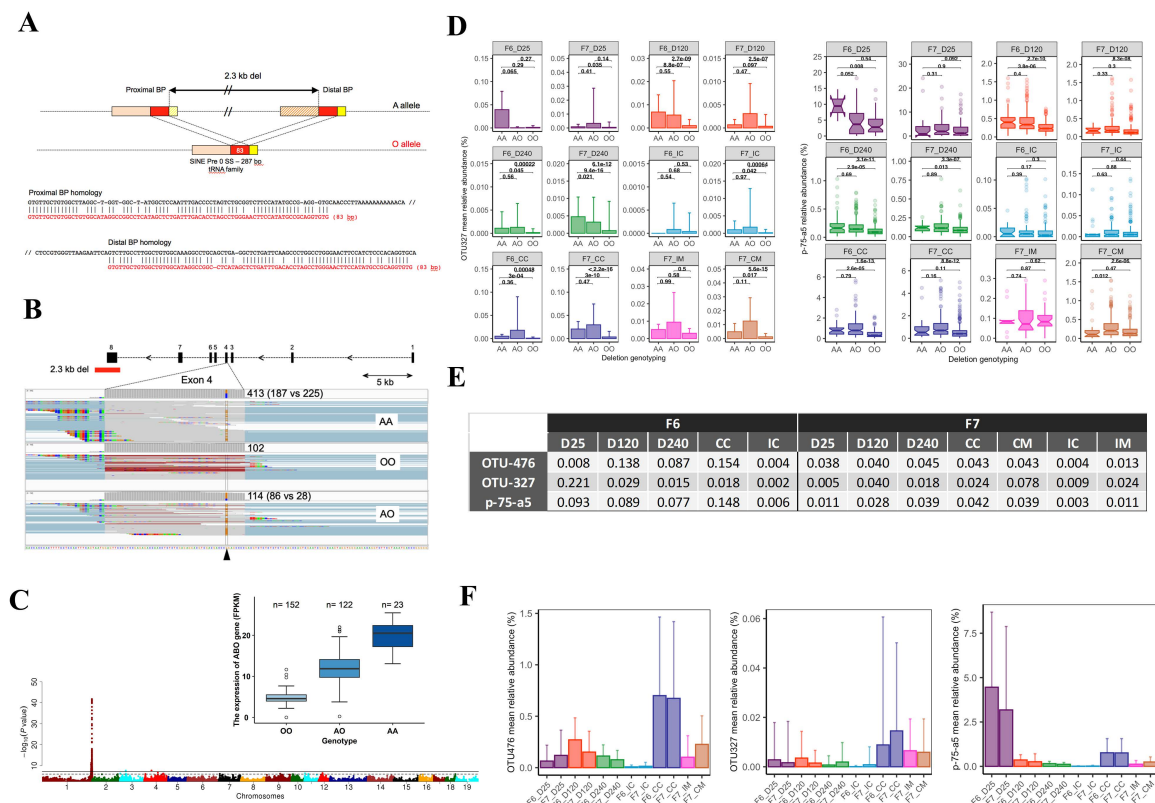

495 **Suppl. Fig. 4: (A) Breakpoints of the 2.3 kb deletion showing the role of a duplicated SINE**  
 496 **sequence in mediating an intra-chromosomal recombination. (B) Illustrative example of allelic**  
 497 **balance for the cG146C SNP in an AA homozygote and of allelic imbalance for the same SNP**  
 498 **in an AO heterozygote. (C) eQTL analysis for the ABO gene maximizing at the exact position**  
 499 **of the 2.3Kb deletion (p = 1.9x10<sup>-43</sup>) and showing the additive effect of the A allele increasing**  
 500 **transcript levels ~ 3-fold (inset; FPKM: Fragments Per Kilobase of transcript per Million**  
 501 **mapped reads). (D) Effect of acetyl-galactosaminyl transferase genotype (AA, AO or OO) on**  
 502 **abundance of OTU-327 and p-75-a5 in the twelve data series. (E) Fraction of the variance in**

504 abundance of the corresponding OTU/genus explained by AO genotype. **(F)** Abundance of  
505 OTU-476, OTU-327 and p-75-a5 in the twelve data series.

506

507 **The chromosome 1 mQTL affects bacterial species with complete N-acetyl-D-**  
508 **galactosamine (GalNAc) import and catabolic pathway.**

509 In human, the ABO acetyl-galactosaminyl transferase gene is broadly expressed yet  
510 particularly strongly in the small and large intestine (Suppl. Fig. 5A). We characterized the  
511 expression profile of the porcine ABO gene in a panel of 15 tissues in an adult animal  
512 (Bamaxiang sow) and a fetus (Duroc male) by RNA-seq. A very similar expression profile was  
513 observed in the pig with strong expression in the gastrointestinal tract, particularly in the  
514 adult (Suppl. Fig. 5B). The acetyl-galactosaminyl-transferase encoded by the A allele adds  
515 GalNAc ( $\alpha$ 1-3 linkage) to a variety of glycan substrates sharing a  $\text{Fuc}\alpha$ 1-2 $\text{Gal}\beta$ 1-4 $\text{GlcNAc}$  or  
516  $\text{Fuc}\alpha$ 1-2 $\text{Gal}\beta$ 1-3 $\text{GlcNAc}$  (H antigen) extremity (Cooling, 2015). In the gut, these include the  
517 heavily glycosylated secreted and transmembrane mucins constituting the cecal mucus.  
518 Mucin glycans are used as carbon source by the intestinal microbiota, especially under low-  
519 fiber diet (Ravcheev & Thiele, 2017; Zuniga et al., 2018). We reasoned that the observed  
520 mQTL might act by altering the intestinal concentration of GalNAc, the A allele thereby  
521 favoring the growth of bacterial species effective at utilizing this sugar.

522 To test this hypothesis, we first measured the concentration of GalNAc in cecal content by LC-  
523 MS/MS in 17 AA animals and 17 OO animals of the F7 generation. GalNAc concentrations  
524 were indeed  $\sim$ 1.8-fold higher in AA than in OO pigs ( $p = 5.6 \times 10^{-4}$ ) (Fig. 6A).

525 To gain insights in the relative capacity of porcine intestinal bacteria to utilize GalNAc, we  
526 then (i) isolated two bacterial strains (4-8-110 and 4-15-1) with V3-V4 sequence similarity of  
527 100% and 99.8% with OTU-476 from porcine feces and sequenced their genome on a ONT  
528 PromethION platform (Oxford Nanopore Technology, UK), and (ii) built 3,111 metagenomic  
529 assembled genomes (MAGs) from shotgun sequence data obtained from 92 samples  
530 including feces, content of three intestinal locations (jejunum, ileum, cecum), and eight  
531 populations (26 F6, 12 Duroc, 12 Large White, 12 Tibetan, 6 Laiwu, 6 Licha, 6 Berkshire x Lisha  
532 F1s, and 12 Chinese wild boars). Of the 3,111 MAGs, 248 were assigned to the family  
533 *Erysipelotrichaceae* using PhyloPhlAn (Segata et al., 2013). To be used as carbon source by  
534 intestinal bacteria, GalNAc needs (i) to be released from the glycan structures by secreted  
535 glycosyl hydrolases (GH), (ii) to be imported across the bacterial membranes by dedicated

536 transport systems (TR), and (iii) to be converted into intermediates of central metabolism by  
537 a specific catabolic pathway (CP). While some bacteria may have both GH and TR/CP for  
538 specific monosaccharides, other may only have the GH (“donors”) or the TR/CP (“acceptors”)  
539 (Ravcheev & Thiele, 2017). We compiled a list of 24 genes (with corresponding KEGG ontology  
540 number) implicated in GalNAc utilization (TR/CP) from the literature (Brinkkötter et al., 2000;  
541 Rodionov et al., 2010; Leyn et al., 2012; Hu et al., 2012; Biddart et al., 2014; Zhang et al., 2015;  
542 Ravcheev & Thiele, 2017, Zuniga et al., 2018). These encode (i) 11 components of one of  
543 three GalNAc transporter systems (AgaPTS: *agaE*, *agaF*, *agaV*, *agaW*; TonB dependent  
544 transporter: *omp*, *agaP*, *agaK*; GnbPTS: *gnbA*, *gnbB*, *gnbC*, *gnbD*), (ii) two GalNAc-6P  
545 deacetylases (*agaA*, *nagA*), (iii) two galactosamine-6P (GalN-6P) isomerase and/or  
546 deaminases (*agal*, *agaS*), (iv) three tagatose-6P kinases (*pfka*, *lacC*, *fruK*), (v) four tagatose-  
547 1,6-PP aldolases or aldolase subunits (*gatY-kbaY*, *gatZ-kbaZ*, *lacD*, *fba*), and (vi) two regulon  
548 repressors (*agaR*, *gntR*), for a total of six essential pathway constituents (Suppl. Table 7).  
549 Genes involved in the utilization of specific sugars (including GalNAc) tend to cluster and form  
550 operons of potentially coregulated genes (regulons) that support all or most of the essential  
551 TR/CP steps. The steps that are not encoded by the operon may be complemented in trans  
552 by genes encoding enzymes that are often less substrate-specific (Lawrence, 1999; Koonin,  
553 2009). We used GhostKOALA (Kanehisa et al., 2016) to search for orthologues of the 24 genes  
554 in the two OTU476-like genomes and 3,111 MAGs. We generated two scores to evaluate the  
555 capacity of bacterial species to utilize GalNAc. The first (pathway score) counted the number  
556 of essential steps in GalNAc utilization (out of six) that could be accomplished by the set of  
557 orthologues detected in the genome (cfr. Methods), irrespective of their map position. The  
558 second (regulon score) counted the number of essential GalNAc utilization steps that could  
559 be fulfilled by orthologues that were clustered in the genome, i.e. forming a potential operon.  
560 Following Ravcheev and Tiele (2017), we used *agaS* as anchor gene to establish the regulon  
561 score, i.e. we counted how many essential steps in GalNAc utilization (out of six) were covered  
562 by genes located in the vicinity of *agaS*.

563 The first striking observation was that at least one orthologue of *agaS* was found in the two  
564 (=100%) OTU476-like strains (4-15-1 and 4-8-110), in 31% of *Erysipelotrichaceae* MAGs  
565 (n=248), yet in only 3.0% of other MAGs (n=2,863). The second, was that both scores  
566 (pathway and regulon score) were very significantly higher for *Erysipelotrichaceae* than for  
567 other MAGs ( $p_{\text{pathway}}=2.0e-16$  and  $p_{\text{regulon}}=2.0e-16$ ), and for the two OTU476-like strains than

568 for *Erysipelotrichaceae* and non- *Erysipelotrichaceae* MAGs combined ( $p_{\text{pathway}}=2.2e-3$  and  
569  $p_{\text{regulon}}=1.2e-5$ ) (Fig. 6B). These comparisons accounted for variation in the MAGs' completion  
570 score, number of contigs and predicted size of the corresponding genomes (see Methods).  
571 Examination of the genome of the two OTU476-like strains revealed clustering of eight  
572 GalNAc genes including orthologues of the four components of the AgaPTS transporter  
573 system (*agaE*, *agaF*, *agaV*, *agaW*), of *nagA* deacetylase, of *agaS* deaminase/isomerase, of  
574 *fruK* kinase, and of the *gatZ-kbaZ* aldolase subunit. This amounted to a score of five for both  
575 pathway and regulon score, corresponding (after accounting for completion, contig number  
576 and genome size) to the top 4.7% and 0.35% of 3,113 pathway and regulon scores,  
577 respectively. The organization of the GalNAc gene cluster was identical in both strains (4-15-  
578 1 and 4-8-110), covering ~50Kb. Intriguingly, closer examination of the corresponding region  
579 also revealed an orthologue of the *nagB* GlcNAc deaminase/isomerase, and of the *fruR2*  
580 member of the DeoR family of transcriptional regulators, which are paralogues of *agaS* and  
581 *agaR*, respectively (Fig. 6C).  
582 We further showed that adding GalNAc in the culture medium indeed enhances the growth  
583 of the two isolated OTU-476 like strains, indicating that these can indeed utilize GalNAc as  
584 carbon source (Fig. 6D).  
585 Taken together, these findings provide strong support for our hypothesis, i.e. that the mQTL  
586 acts by increasing cecal GalNAc concentration hence favoring the growth of bacterial species  
587 effective at utilizing GalNAc.



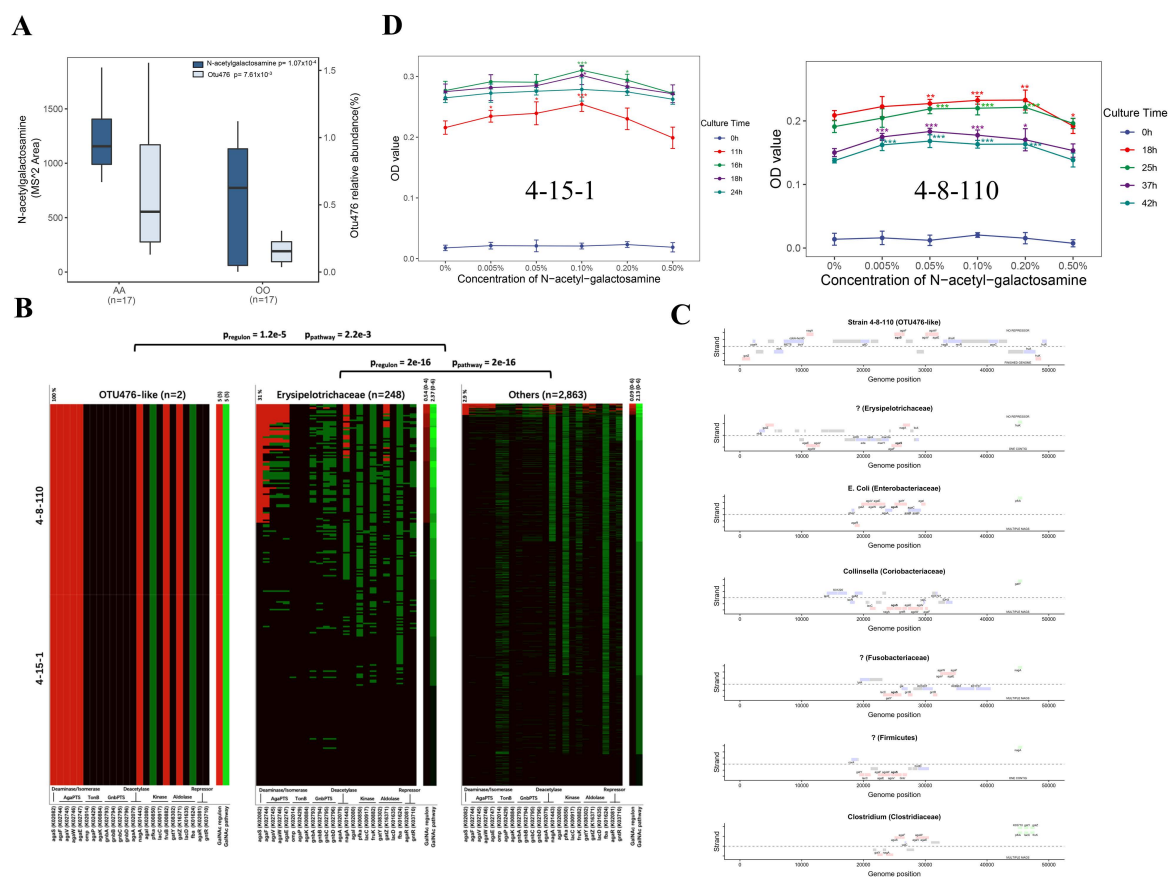

588  
 589 **Figure 6:** (A) Concentrations of GalNAc measured by LC-MS/MS in cecal content of 17 AA and  
 590 17 OO day 240 pigs. Abundances of OTU-476 determined by 16S RNA gene sequencing are  
 591 shown for the same samples. (B) Presence anywhere in the genome (green), presence in close  
 592 proximity to *agaS* (red), or absence (black) of the orthologues of 24 genes implicated in the  
 593 GalNAc TR/CP pathway in the genome of (i) two OTU-476 like strains (4-15-1 and 4-8-110), (ii)  
 594 248 MAGs assigned to the *Erysipelotrichaceae* family, and (iii) 2,863 MAGs assigned to other  
 595 bacterial families. The two lanes on the right of the three panels correspond to the Regulon  
 596 (red) and Pathway (green) score respectively. Both scores range from 0 (black) to 6 (bright  
 597 red or green). Means (range) for the corresponding dataset are given on top. (C) Maps of  
 598 GalNAc “operons” in one of the two OTU476-like strains and six MAGs assigned respectively  
 599 to an *Erysipelotrichaceae*, *E. coli* (an *Enterobacteriaceae*), a *Collinsella* (a *Coriobacteriaceae*),  
 600 a *Fusobacteriaceae*, a *Firmicutes* and a *Clostridium*. Identified Open Reading Frames (ORFs)  
 601 are represented as colored boxes. Genes implicated in GalNAc import and catabolism are in  
 602 red if they are part of the cluster and in green if located elsewhere in the genome. Genes with  
 603 a known function unrelated to GalNAc are in blue. ORFs with uncharacterized gene product  
 604 in gray. Gene acronyms are given next to the corresponding boxes. ORFs transcribed from



615

Supplemental table 7: Bacterial genes implicated in GalNAc import and catabolism

| Function            | Names                      | GalNAc                                      | K(egg) numbers                  | References                                                                           |                      |
|---------------------|----------------------------|---------------------------------------------|---------------------------------|--------------------------------------------------------------------------------------|----------------------|
| Transport           | AgaPTS (PTS-I)             | AgaF/EIIA(Aga)                              | K02744                          | Ravcheev & Tiele, 2017; Brinkkötter et al., 2000; Leyn et al., 2012; Hu et al., 2012 |                      |
|                     |                            | AgaV/EIIB(Aga)                              | K02745                          |                                                                                      |                      |
|                     |                            | AgaW/EIIC(Aga)                              | K02746                          |                                                                                      |                      |
|                     |                            | AgaE/EIID(Aga)                              | K02747                          |                                                                                      |                      |
|                     | TonB dependent transporter | Omp(aga)                                    | TonB dependent transporter      | K02014                                                                               | Leyn et al., 2012    |
|                     |                            | AgaP                                        | Permease                        | K02429                                                                               |                      |
|                     |                            | AgaK                                        | Kinase                          | K00884                                                                               |                      |
|                     | GnbPTS                     | gnbA/PTSIIA/02950                           |                                 | K02793                                                                               | Biddart et al., 2014 |
|                     |                            | gnbB/PTSIIIB/02920                          |                                 | K02794                                                                               |                      |
|                     |                            | gnbC/PTSIIIC/02930                          |                                 | K02795                                                                               |                      |
| gnbD/PTSIIID/02940  |                            |                                             | K02796                          |                                                                                      |                      |
| Deacetylase         | AgaA                       | Aga-6P deacetylase                          | K02079                          | Ravcheev & Tiele, 2017, Zhang et al. 2015                                            |                      |
|                     | NagA                       | GlcNAc-6P deacetylase, in or outside operon | K01443                          |                                                                                      |                      |
| Deaminase/isomerase | AgaS                       | ga-6P deaminase/isomerase                   | K02082                          | All                                                                                  |                      |
| Deaminase           | AgaI                       | putative ga-6P deaminase                    | K02080                          | Hu et al., 2012; Zhang et al., 2015                                                  |                      |
| Tag-6P kinase       | "AgaZ"                     | Pfka                                        | K00850                          | Hu et al., 2012; Zhang et al., 2015                                                  |                      |
|                     |                            | lacC                                        | K00917                          |                                                                                      |                      |
|                     |                            | fruK                                        | K00882                          |                                                                                      |                      |
|                     |                            | GatY/KbaY                                   | sub1                            |                                                                                      | K08302               |
| Tag-1,6P aldolase   | GatZ/KbaZ                  |                                             | sub2                            | K16371                                                                               |                      |
|                     |                            | lacD                                        |                                 | K01635                                                                               |                      |
|                     |                            | Fba                                         | Fructose-biphosphate aldolase   | K01624                                                                               |                      |
|                     |                            | AgaR                                        | Aga operon repressor (DeoR fam) | K02081                                                                               |                      |
| Repressor           | GntR                       |                                             | Repressor (GntR fam)            | K03710                                                                               |                      |
|                     |                            |                                             |                                 |                                                                                      |                      |

616

617

618 **No effect of ABO genotype on intestinal microbiota composition in human.**

619 The effect of ABO genotype on intestinal microbiota composition in humans remains  
 620 somewhat controversial. Despite suggestive evidence in a small (n=71) cohort of separate  
 621 microbiota-based clustering of AB and B vs A and O individuals (secretors only) (Makivuokko  
 622 et al., 2012), a subsequent study conducted in a larger cohort (n=1,503) could not detect  
 623 experiment-wide significant effects of either secretor or ABO genotype on gut microbiota  
 624 composition (Davenport et al., 2016). Intriguingly, the latter study nevertheless reported a  
 625 possible effect of ABO genotype on a rare OTU (592616) assigned to *Erysipelotrichaceae*.

626 We took advantage of an available intestinal 16S rRNA dataset of ~300 healthy individuals of  
 627 European descent to re-examine this question in light of the results obtained in the pig  
 628 (Momozawa et al., 2018). All individuals were genotyped with the OmniExpress SNP array  
 629 (Illumina) and imputed to whole genome. ABO genotype was inferred from the genotypes at  
 630 three coding variants (rs8176719, rs7853989, rs8176747) following Cooling (2015). The  
 631 frequency of the different genotypes in the cohort were: 0.37 (OO), 0.37 (AO), 0.11 (BO), 0.08  
 632 (AA) and 0.06 (AB). Twenty-one percent of the individuals in the cohort were non-secretors  
 633 (homozygous for the W143X mutation in the FUT2 gene) (Kelly et al., 1995). For each  
 634 individual we obtained V1-V2, V3-V4 and V5-V6 16S rRNA sequences from intestinal biopsies  
 635 (cfr. Methods). 16S rRNA sequences were clustered in OTUs using DNACLUSt (Ghodsi et al.,  
 636 2011) with a 97% similarity threshold. Forty-three (V1-V2), 20 (V3-V4) and nine (V5-V6) OTUs  
 637 with abundance >0.001% across locations and amplicons were assigned to  
 638 *Erysipelotrichaceae* using the Silva database (Quast et al., 2013). The effect of ABO blood

639 group on OTU abundance was tested using a linear model including blood group (AA, AO, AB  
640 versus rest, BB, BO, BB versus rest, OO versus rest), secretor status, sex, age, smoking status  
641 and BMI (cfr. Methods). There was no convincing evidence for an effect of ABO blood group  
642 on the abundance of *Erysipelotrichaceae* OTU (Suppl. Fig. 6). The SILVA database does not  
643 include genus p-75-a5. We directly mapped the 16S rRNA reads to the Greengenes database  
644 (DeSantis et al., 2006). Putative p-75-a5 reads were detected in five individuals only (four  
645 OO and one AO) in which they accounted for 0.003%-0.25% of the reads.

646

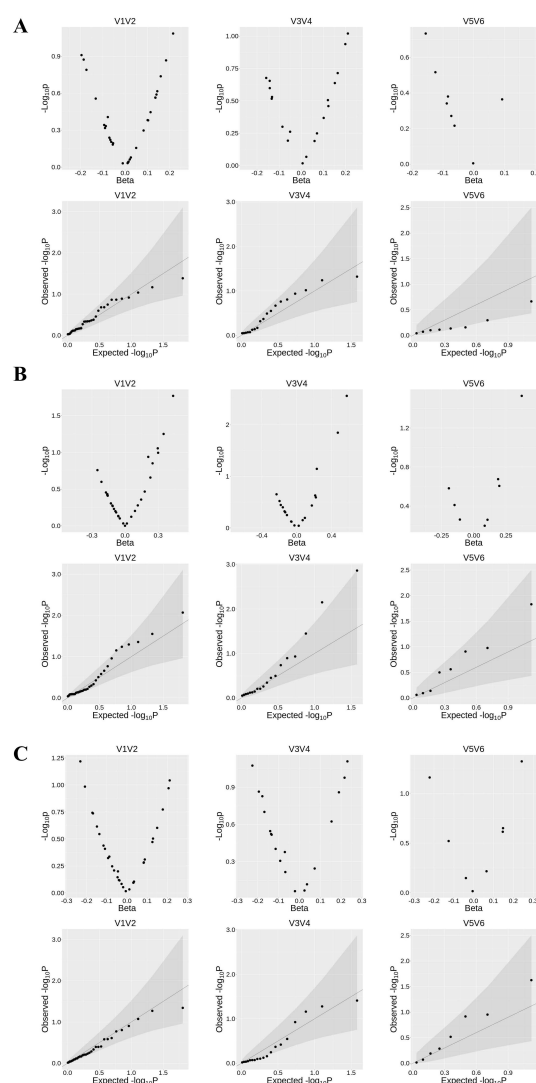

647

648 **Suppl. Fig. 6:** Volcano and QQ plots for 43 (V1-V2), 20 (V3-V4) and 9 (V5-V6) OTUs classified  
649 as *Erysipelotrichaceae* for the contrasts **(A)** [AA, AO and AB] versus [BB, BO and OO], **(B)** [BB,  
650 BO and AB] versus [AA, AO and OO], and **(C)** [OO] versus [all others].

651

652

## 653 Discussion

654 We herein report the use of a genetically heterogeneous population to study the impact of  
655 host genetics on the composition of the intestinal microbiota of the pig. More than 30 million  
656 variants with  $MAF \geq 3\%$  segregate in this population, i.e. more than one variant every 100  
657 base pairs. This is slightly lower than the 40 million high quality variants segregating in the  
658 mouse collaborative cross (Srivastava et al., 2017). The average nucleotide diversity ( $\pi$ , i.e.  
659 the proportion of sites that differ between two chromosomes sampled at random in the  
660 population(s)) within the four Chinese founder breeds was  $\sim 2.5 \times 10^{-3}$  and within the four  
661 European founder breeds  $\sim 2.0 \times 10^{-3}$ . By comparison,  $\pi$ -values in African and Asian/European  
662 human populations are  $\sim 9 \times 10^{-4}$  and  $\sim 8 \times 10^{-4}$ , respectively (Yu et al., 2001; The 1,000  
663 Genomes Project Consortium, 2010). Thus, against intuition (as domestication is often  
664 assumed to have severely reduced effective population size) the within population diversity  
665 is  $> 2$ -fold higher in domestic pigs than in human populations, as previously reported (Frantz  
666 et al., 2015; Charlier et al., 2016; Georges et al., 2019). Nucleotide diversities between  
667 Chinese and between European founder breeds were  $\sim 3.6 \times 10^{-3}$  and  $\sim 2.5 \times 10^{-3}$ , i.e. 1.44-fold  
668 and 1.25-fold higher than the respective within breed  $\pi$ -values. These  $\pi$ -values are of the  
669 same order of magnitude as the sequence divergence between *Homo sapiens* and  
670 Neanderthals/Denisovans ( $\sim 3 \times 10^{-3}$ , Sankararaman et al., 2014). By comparison,  $\pi$ -values  
671 between Africans, Asians and Europeans are typically  $\leq \sim 1 \times 10^{-3}$  (Yu et al., 2001). The  
672 nucleotide diversity between Chinese and European breeds averaged  $\sim 4.3 \times 10^{-3}$ . This  $\pi$ -value  
673 is similar to the divergence between *M. domesticus* and *M. castaneus* (Geraldes et al., 2008),  
674 and close to halve the  $\sim 1\%$  difference between chimpanzee and human (Patterson et al.,  
675 2006). Note that Chinese and European pig breeds are derived from Chinese and European  
676 wild boars, respectively, which are thought to have diverged  $\sim 1$  million years ago (Groenen,  
677 2016), while *M. domesticus* and *M. castaneus* are thought to have diverged  $\leq 500,000$  years  
678 ago (Geraldes et al., 2008). The genomic contribution of the eight founder breeds in the F6  
679 and F7 generation is remarkably uniform and close to expectations (i.e. 12.5%) both at  
680 genome-wide and chromosome-wide level (Fig. 1C), suggesting comparable levels of genetic  
681 diversity across the entire genome. This does not preclude that more granular examination  
682 may reveal local departures from expectations, or under-representation of incompatible  
683 allelic combinations at non-syntenic loci. Such analyses are beyond the scope of this study.

684 Average microbiota composition of the 12 data-series indicates a remarkable consistency for  
685 the same traits across the F6 and F7 generation, yet marked compositional differences  
686 between traits (Fig. 2B). Even at family-level, some taxa are found to be nearly trait-specific  
687 (Suppl. Fig. 1C). For instance, the proteobacteria *Enterobacteriaceae*, *Pseudomonadaceae*,  
688 *Pasteurellaceae*, the firmicutes *Clostridiaceae*, *Peptostreptococcaceae*, *Bacillaceae*,  
689 *Leuconostocaceae*, and the actinobacteria *Microbacteriaceae* are at least ten times more  
690 abundant in ileal than in any other sample type. Amongst those, *Leuconostocaceae* are nearly  
691 digesta-specific, while *Pseudomonadaceae* are nearly mucosa-specific. The Bacteroidetes  
692 *Odoribacteraceae* and *Rikenellaceae* were found to be at least ten times more abundant in  
693 day 25 feces than in any other sample type. The firmicutes *Christensenellaceae* were nearly  
694 ten times more abundant in feces (irrespective of age) than in any other sample type. This  
695 confirms that limiting the analysis of the intestinal microbiota to adult fecal samples can only  
696 provide a very partial view of its complexity and the factors that determine it (Donaldson et  
697 al., 2016).

698 To evaluate the importance of host genetics in determining gut microbiota composition we  
699 first examined the relationship between genetic relatedness and microbiota dissimilarity. It  
700 is worth re-emphasizing that food and environment was very standardized in this experiment  
701 when compared to typical human studies. Genetic relatedness between individuals was  
702 measured using genome-wide SNP information while microbiota dissimilarity was measured  
703 using Bray-Curtis distance (f.i. Rothschild et al., 2017). We relied on two approaches to  
704 mitigate confounding of genetic and environmental effects. In the first we restricted the  
705 analyses to full-sibs raised in the same environment, i.e. we confronted genetic similarity and  
706 microbiota dissimilarity of litter-mates. In the second we confronted genetic similarity and  
707 microbiota dissimilarity across generations (F6 and F7), yet avoiding parent–offspring pairs.  
708 Both approaches supported an effect of genetics on microbiota composition manifested by  
709 significant negative correlations between genetic similarity and microbiota dissimilarity for  
710 (some) individual traits as well as when combining information across traits (Fig. 3A&B).  
711 Regressing squared phenotypic difference on genetic distance is an established way to  
712 estimate local and global heritability (Haseman & Elston, 1972; Visscher et al., 2006). Yet,  
713 Bray-Curtis distance is peculiar in that the phenotypes between which a “difference” is  
714 measured are not defined *per se* (Bray and Curtis, 1957). To nevertheless evaluate to what  
715 degree of heritability the observed negative correlations might correspond, we simulated

716 quantitative traits with various degrees of heritability in the actual pedigrees and examined  
717 the distribution of ensuing correlations between phenotypic distance (absolute value) and  
718 genetic distance. These analyses indicated that (in the studied, genetically highly divergent,  
719 population) the heritability of microbiota composition may be of the order of  $\sim 0.80$  within  
720 litter, and  $\sim 0.20$  in the overall population (Suppl. Fig. 7). That the heritability is higher within  
721 litter than in the overall population is expected as the environment is obviously more  
722 homogeneous within than across litters and generations. Strikingly the impact of genetics was  
723 strongest for fecal samples at day 240 in all analyses. This may be in agreement with the  
724 observation that, in human, microbiota composition stabilizes with age (Aleman & Valenzano,  
725 2019). Yet, why heritability should be higher in feces than for ileal and cecal content and  
726 mucosa remains unclear. Sample types with higher alpha-diversity may be more resilient and  
727 hence more heritable.

728 We also measured the heritability of the abundance of individual taxa. As before, we only  
729 extracted within-litter information to mitigate confounding between environment and  
730 genetics. Convincing evidence for a genuine influence of host genetics on taxa abundance  
731 was the observation of a significant correlation between heritability estimates in the F6 and  
732 F7 generation for fecal samples at day 240 and – to a lesser extend – cecum content (Suppl.  
733 Fig. 2A). Thus, as for overall microbiota composition, the impact of genetics on abundance  
734 of individual taxa appeared highest for feces of mature animals. It is noteworthy that the  
735 family with highest heritability in humans (*Christensenellaceae*) also ranked amongst the top  
736 raking taxa in the pig data.

737 Heritability does not accurately foretell the genetic architecture of traits. Phenotypes with  
738 low heritability may be affected by variants with major effects (f.i. Kadri et al., 2014), while  
739 highly heritable traits may have “omnigenic” architecture (Boyle et al., 2017; Yengo et al.,  
740 2018). To gain insight in the genetic architecture of gut microbiota composition in this  
741 population we performed GWAS. We identified more than 1,500 signals (corresponding each  
742 to a lead SNP x taxon combination) exceeding the genome-wide  $5 \times 10^{-8}$  significance threshold  
743 in at least one of the 12 data series. That these include true positive signals was most  
744 convincingly demonstrated by the marked shifts towards low p-values when examining the  
745 associations between the corresponding lead SNP and taxon in the other data series (Fig. 4A  
746 and Suppl. Fig. 3C).

747 One signal on the telomeric end of chromosome 1 clearly stood out above background noise  
748 (experiment-wide significant) in both F6 and F7 cohort, affecting multiple taxa assigned to  
749 *Erysipelotrichaceae* (Fig. 4). We showed that this mQTL is caused by a null allele of the ABO  
750 gene that results from a 2.3 Kb deletion eliminating 63% of the acetyl-galactosaminyl  
751 transferase protein sequence. The corresponding O allele was shown to segregate at  
752 moderate to high frequency in the eight founder breeds of the mosaic population, in Chinese,  
753 Russian and West-European wild boar populations, and in *Sus cebifrons*, a suidae that  
754 diverged from the ancestor of the pig ~3.5 million years ago. To gain additional insights in  
755 the age of the porcine O allele, we generated phylogenetic trees of the A and O alleles of 14  
756 AA and 34 OO animals including domestic pigs, wild boars, Visayan and Javanese warty pigs,  
757 and common African warthog. Examination of their local SNP genotypes (50K window  
758 encompassing the ABO gene) reveals traces of ancestral recombinations between O and A  
759 haplotypes as close as 300 and 800 base pairs from the proximal and distal deletion  
760 breakpoints, respectively, as well as multiple instances of homoplasmy that may either be due  
761 to recombination, gene conversion or recurrent de novo mutations. On their own, these  
762 signatures support the old age of the O allele. We constructed UPGMA trees based on  
763 nucleotide diversity for windows ranging from 500-bp to 40-Kb centered on the 2.3-Kb  
764 deletion. Smaller windows have a higher likelihood to compare the genuine ancestral O  
765 versus A states, yet yield less robust trees because they are based on smaller number of  
766 variants. Larger windows will increasingly be contaminated with recombinant A-O  
767 haplotypes blurring the sought signal. Indeed, for windows  $\geq$  20-Kb or more, the gene tree  
768 corresponds to the species tree, while for windows  $\leq$  15-Kb the tree sorts animals by AA vs  
769 OO genotype (Suppl. Fig. 8). For all windows  $\leq$  15-Kb the *Sus cebifrons* O allele maps outside  
770 of the *Sus scrofa* O allele supporting a deep divergence (rather than hybridization) and hence  
771 the old age of the O allele. Of note, for windows  $\leq$  1.2-Kb, the warthog A allele is more closely  
772 related to the *Sus* A alleles than to the *Sus* O alleles (Suppl. Fig. 8). This suggests that the O  
773 allele may be older than the divergence of the *Phacochoerus* and *Sus* A alleles, i.e. > 10 MYA.  
774 It will be interesting to study larger numbers of warthog to see whether the same 2.3-Kb  
775 deletion exists in this and other related species as well.  
776 This situation in suidae is reminiscent of the trans-species polymorphism of the ABO gene in  
777 primates attributed to balancing selection (Ségurel et al., 2012). The phenotype driving  
778 balancing selection remain largely unknown yet a tug of war with pathogens is usually invoked:



779 synthesized glycans may affect pathogen adhesion, toxin binding or act as soluble decoys,  
780 while naturally occurring antibodies may be protective (Blancher, 2013; Cooling et al., 2015).  
781 In humans, the O allele may protect against malaria (Rowe et al., 2007), *E. Coli* and *Salmonella*  
782 enteric infection (Robinson et al., 1971), SARS-CoV-1 (Chen et al., 2005), SARS-CoV-2  
783 (Ellinghaus et al., 2020) and schistosomiasis (Camus et al., 1977; Pereira et al., 1979; Ndamba  
784 et al., 1997), while being a possible risk factor for cholera (Chaudhuri and De, 1977), *H. pylori*  
785 (Boren et al., 1993) and norovirus infection (Lindesmith et al., 2003). Whatever the underlying  
786 selective force, it appears to have operated independently in at least two mammalian  
787 branches (primates and suidae), over exceedingly long periods of time, and over broad  
788 geographic ranges, hence pointing towards its pervasive nature. To gain insights in what  
789 selective forces might underpin the observed balanced polymorphism, we tested the effect  
790 of ABO genotype on >150 traits measured in the F6 and F7 generations pertaining to carcass  
791 composition, growth, meat quality, hematological parameters, disease resistance and  
792 behavior. No significant effects were observed when accounting for multiple testing (Suppl.  
793 Fig. 9), including those pertaining to immunity and disease resistance.

794 It is noteworthy that the old age of the “O” allele must have contributed to the remarkable  
795 mapping resolution ( $\leq 3$  Kb) that was achieved in this study. In total, 42 variants were in  
796 near perfect LD ( $r^2 \geq 0.9$ ) with the 2.3 Kb deletion in the F0 generation, spanning 2,298 bp  
797 (1,522 on the proximal side, and 762 on the distal side of the 2.3 Kb deletion). This 2.3 Kb  
798 span is lower than genome-wide expectations (17th percentile), presumably due to the  
799 numerous cross-overs that have accrued since the birth of the 2.3 Kb deletion that occurred  
800 in the distant past (Fig. 1E). Yet the number of informative variants within this small segment  
801 is higher than genome-wide average of (57% percentile) also probably due at least in part to  
802 the accumulation of numerous mutations since the remote time of coalescence of the A and  
803 O alleles (Fig. 1D).

804 The chromosome 1 QTL was the only signal that exceeded experiment-wide discovery and  
805 conformation thresholds. QQ-plots obtained after removing chromosome 1 variants (272.8-  
806 273.1Mb interval) did not show convincing evidence for residual inflation of  $\log(1/p)$  values  
807 (Suppl. Fig. 3D). This suggests that the residual heritability most likely has a highly polygenic  
808 architecture, as becoming increasingly apparent for most complex traits.

809 The chromosome 1 mQTL was shown to affect the abundance of bacterial species belonging  
810 to the family *Erysipelotrichaceae*. The effect was particularly significant for two OTUs (476

811 and 327) and genus p-75-a5, but affected at least some other *Erysipelotrichaceae* as well. As  
812 mentioned above, effects of ABO genotype on host-pathogen interactions are usually  
813 interpreted in the context of adhesion or immune response. Yet an alternative mechanism  
814 is by altering the source of carbon upon which intestinal bacteria feed. Small and large  
815 intestine are amongst the tissues in which the ABO gene is the most strongly expressed (Suppl.  
816 Fig. 5A&B). One of its substrates is the heavily glycosylated mucins constituting the intestinal  
817 mucus. Mucosal glycans can be used as carbon source by intestinal microorganisms  
818 (Mahowald et al., 2009). Glycans first need to be degraded, and the released  
819 monosaccharides then imported and catabolized. We reasoned that the mucus of AA/OO  
820 pigs would be enriched in GalNAc when compared to OO animals, and that this might favor  
821 the growth of bacterial species able to use GalNAc as carbon source. This model makes at  
822 least two predictions. The first is that the intestinal GalNAc content should be higher in AA  
823 than in OO pigs and this was indeed shown to be the case (Fig. 6A). The second is that the  
824 bacteria affected by the mQTL should be able to use GalNAc. We isolated two strains with  
825 16S rRNA sequences that were near-identical to those of the OTU strain (OTU476) that was  
826 most affected by the mQTL, and sequenced their complete genome. We showed that it  
827 contained the orthologues of eight genes known to be essential for GalNAc import (AgaPTS:  
828 *agaE*, *agaF*, *agaV*, *agaW*) and catalysis of the first four GalNAc-specific degradation steps  
829 (deacetylation: *nagA*; demanination/isomerisation: *agaS*; kination: *fruK*; aldolase: *gatZ*)  
830 hence the five key steps in GalNAc utilization. Importantly, the eight genes clustered in a 50  
831 Kb chromosome segment (Fig. 6C). We generated 3,111 porcine intestinal MAGs from  
832 metagenomic shotgun data for comparison. None of these would harbor a GalNAc gene  
833 cluster encoding more than four of the five key steps. One catalytic function was always  
834 provided in trans, whether GalNAc-6-P deacetylase, tagatose-6-P kinase, or tagatose-1,6-PP  
835 aldolase. This finding clearly revealed the unique status of OTU476 with regards to GalNAc  
836 utilization. Also consistent with the QTL findings, *Erysipelotrichaceae* MAGs were strongly  
837 enriched in clustered GalNAc TR/CP orthologues when compared to MAGs assigned to other  
838 bacterial species. Finally, the growth of the two isolated OTU476-like strains was shown to  
839 increase when fed with increasing concentrations of GalNAc (Fig. 6D).

840 Amongst the 3,111 studied MAGs, 15 harbored a gene cluster able to sustain four of the five  
841 steps, while the fifth enzyme was encoded somewhere else in the genome. These included  
842 one unidentified member of the *Erysipelotrichaceae* family, five strains of *E. Coli*, two

843 *Collinsella* strains (family *Coriobacteriaceae*), two unidentified *Fusobacteriaceae*, and one  
844 unidentified *Firmicutes* (Fig. 6C). Gene order within the corresponding GalNAc clusters was  
845 supported by observation in two or more independent MAGs and/or by the fact that all  
846 concerned genes resided on the same contig. For all 15, the orthologue needed to fulfill the  
847 fifth enzymatic reaction (2x tagatose-1-P kinase, 2x GalNAc deacetylase, 1x tagatose-1,6-PP  
848 aldolase) was found somewhere else in the genome, allowing us to assume that all these  
849 species are able to utilize GalNAc. Fifty additional MAGs contained the orthologues needed  
850 to accomplish the five key steps in GalNAc utilization albeit without evidence for a similar  
851 degree of clustering (either because the genes are indeed not clustered in the corresponding  
852 genomes or because they were segregated across distinct sequence contigs). It is reasonable  
853 to assume that several of those bacteria are also able to utilize GalNAc as carbon source. Why  
854 then would the chromosome 1 mQTL only affect a small subset of *Erysipelotrichaceae* species?  
855 We first reasoned that OTU476-like strains might be more dependent on GalNAc availability  
856 than other species, for instance because they can't utilize alternative, common  
857 monosaccharides as carbon source. To test this hypothesis, we searched for KEGG numbers  
858 that would commonly occur in other genomes, yet were absent in the OTU476-like strains.  
859 We performed this analysis for all MAGs, as well as separately for the MAGs that were  
860 predicted to be able to use GalNAc (cfr. above). There was no convincing evidence that  
861 OTU476 might be missing a common and important monosaccharide-utilizing pathway in  
862 their genome (data not shown). Closer examination of the structure of the most complete  
863 GalNAc gene clusters in the studied MAGs (Fig. 6C) revealed an alternative, possible clue. The  
864 GalNAc gene clusters of the non-*Erysipelotrichaceae* species all have the features expected  
865 from genuine regulons. The relevant ORFs tend to be adjacent to each other (spanning  
866 ~10Kb) and on the same strand, hence compatible with poly-cistronic messenger RNAs  
867 enabling coregulated expression. In striking contrast, the ORFs of the GalNAc clusters of the  
868 OTU476-like strains and at least one studied *Erysipelotrichaceae* are spanning respectively  
869 ~50 and ~30Kb, and appear to be distributed randomly on both strands. Most importantly,  
870 neither genome contained orthologues of *agaR* (K02081) or *gntR* (K03710), which are  
871 encoding negative regulators of GalNAc regulons and were observed in all other GalNAc-rich  
872 MAGs. It is noteworthy that out of the 77 *Erysipelotrichaceae* MAGs encompassing an  
873 orthologue of *agaS*, only two (=2.6%) had an orthologue of *agaR* or *gntR* in its vicinity. This  
874 number has to be compared with the fact that out of the 85 "Other" (i.e. non-

875 *Erysipelotrichaceae*) MAGs encompassing an orthologue of *agaS*, 39 (=46.4%) had such *agaR*  
876 or *gntR* orthologue in *agaS*'s vicinity. The *fruR* repressor that is observed in the vicinity of the  
877 GalNAc genes in the OTU476-like strains was found in the vicinity of *agaS* in only 1/77  
878 instances in *Erysipelotrichaceae* and 3/85 instances in other MAGs, indicating that the *FruR*-  
879 *AgaS* colocalization in OTU476-like strains is likely coincidental. Taken together, this suggests  
880 that, contrary to *E. Coli* and other bacterial species, the OTU476-like strains and some  
881 *Erysipelotrichaceae* are not endowed with the capacity to sense GalNAc concentrations in the  
882 medium and only induce expression of the genes and proteins necessary for GalNAc  
883 utilization when needed (Leyn et al., 2012; Biddart et al., 2014; Zhang et al., 2015), but may  
884 rather express their GalNAc-related genes constitutively. The GalNAc gene cluster as seen in  
885 the OTU476-like strains is a possible evolutionary intermediate towards the formation of a  
886 genuine regulon as seen in *E. Coli*, already facilitating horizontal transmission of a "selfish"  
887 functional gene ensemble even if not yet adaptively coregulated (Lawrence, 1999). This  
888 testable hypothesis (constitutive versus inducible expression) suggests an alternative modus  
889 operandi of the chromosome 1 QTL. Against intuition, bacteria affected by the mQTL (i.e.  
890 OTU-476, OTU-327, p-75-a5 and some other *Erysipelotrichaceae*) may very well not be at an  
891 advantage when GalNAc is present at high concentration in the intestinal content (as in AA  
892 and AO animals), but rather at a disadvantage when GalNAc is present at low concentrations  
893 (as in OO animals) because then they waste energy transcribing and translating useless genes.  
894 By regulating expression of their GalNAc operon in response to ambient GalNAc availability,  
895 species like *E. Coli* may fair equally well in the gut of AA/AO as in that of OO pigs, hence not  
896 be affected by the mQTL. It is worth noting that the A allele is dominant with regards to  
897 OTU476, OTU327 and p-75-a5 abundance (Fig. 5B), suggesting that the additional increase in  
898 GalNAc concentrations in AA (vs AO) animals does not further benefit these taxa.  
899 We examined the effect of ABO blood group on the abundance of ~75 OTUs assigned to  
900 *Erysipelotrichaceae* in human gut samples. Although we could not rigorously test this for all  
901 OTUs (as some human V1-V2 and V5-V6 data could not directly be compared with porcine V3-  
902 V4 data) none of the OTUs detected in human samples were as closely related to the pig OTU-  
903 476, OTU-327 or p75.a5 as these were to each other. We found no evidence for an effect of  
904 ABO blood group on the abundance of any of these OTUs. What underlies the difference  
905 between pigs and humans is unclear. Either strains susceptible to ABO genotype are not  
906 present at sufficient frequency in human feces, or the carbohydrate composition of human

907 intestinal content makes these strains less sensitive to variations in GalNAc concentrations.  
 908 It is worth noting that the studied human samples were intestinal biopsies collected after a  
 909 standard gut cleansing procedure. The abundance of the genus p-75-a5 was recently found  
 910 to differ significantly between African subsistence categories and to be highest in pastoralists  
 911 (as compared to hunter-gatherers and agro-pastoralists) possibly as a result of interaction  
 912 with livestock (Malmuthuge et al., 2014; Hansen et al., 2019). Repeating the experiments in  
 913 pastoralist populations may reveal the same mQTL effect detected in this study.

914

915

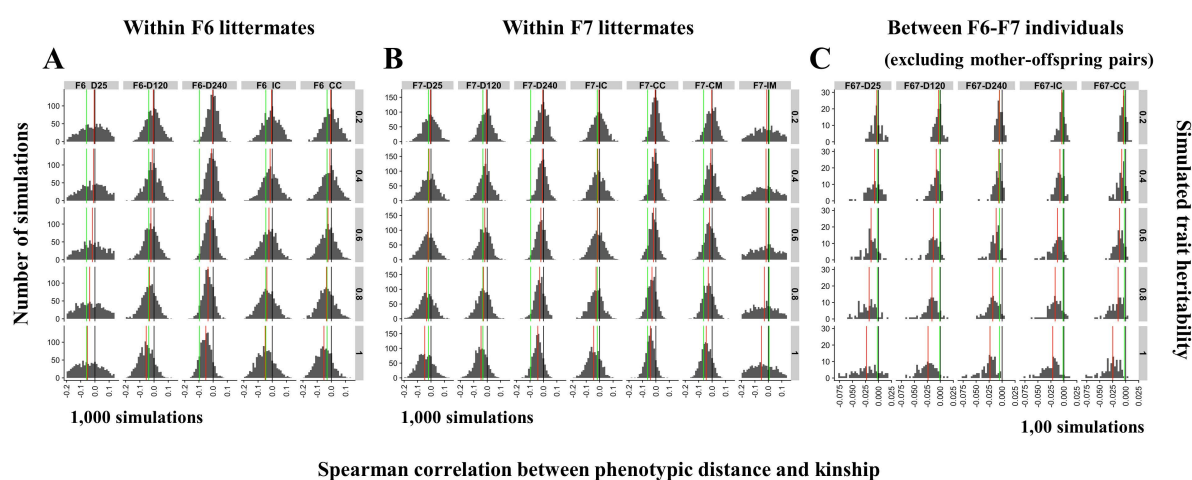

916

917 **Supplemental Figure 7:** We observed an excess of negative correlations between genetic  
 918 similarity (from SNP genotype data) and microbiota dissimilarity (Bray Curtis distance  
 919 computed from 16S rRNA data) both within litter as well as between generations, supporting  
 920 an effect of host genetics and intestinal microbiota composition (Fig. 3A&B). We took care in  
 921 these analyses to mitigate effects of litter on both genetic and microbiota distance metrics,  
 922 (as these may inflate statistical significance) by applying permutations tests. Regressing  
 923 squared phenotypic difference on genetic distance is a standard way to estimate local or  
 924 global heritability (Haseman & Elston, 1972; Visscher et al., 2006). It can be shown that  
 925  $-\hat{\beta}/(2\hat{\sigma}_p^2)$  estimates the narrow sense heritability  $\hat{h}^2$ . In these,  $\hat{\beta}$  is the least square  
 926 regression coefficient and  $\hat{\sigma}_p^2$  an estimate of the phenotypic variance. In our analyses, and  
 927 following standard procedures (f.i. Rothschild et al., 2017), we used Bray-Curtis as distance  
 928 measure for microbiota composition. For this metric, there is no corresponding individual  
 929 phenotype  $p_i$  per se. We therefore used simulations to translate the observed negative  
 930 correlations in measures of heritability. For the within-generation/within-litter analyses, we

931 first used the actual measures of kinship for all litter-mates computed with GEMMA (Zhou &  
932 Stephens, 2012) and corresponding to the x-axis in Fig. 3A. We standardized them (mean 0  
933 and SD 1), scaled them (mean of 0.5 and SD 0.04, following Visscher et al., 2006) and  
934 multiplied them by  $h^2$  (0.2, 0.4, 0.6, 0.8 or 1.0). We sampled “breeding values” from a  
935 multivariate normal distribution with means 0 and corresponding variance-covariance matrix  
936 using the *mvrnorm* R function. For each individual, we sampled an environmental effect from  
937 a normal distribution with mean 0 and variance  $(1 - h^2)$  using the *rnorm* R function.  
938 Breeding values and environmental effects were added to yield a phenotypic value  $p_i$  for each  
939 individual. We then computed Spearman’s rank correlation between  $abs(p_i - p_j)$  and  $\Theta_{ij}$   
940 for all pairs of litter mates  $i$  and  $j$  using the *cor.test(method="spearman")* R function. In this  
941  $\Theta_{ij}$  is the kinship metric computed by GEMMA. We repeated the simulations 1,000 times.  
942 Suppl. Fig. 7A&B show the distribution of the corresponding correlations ( $r$ ) for the 12 data  
943 series and 5 values of  $h^2$ . The black vertical line corresponds to zero. The red vertical line to  
944 the median of the simulations. It can be seen that as the heritability increases the value of  
945 the median decreases as expected. The green lines correspond to the corrected correlation  
946 ( $r_c$ ) obtained with the real data. A rough estimate of the heritability of the real trait  
947 (microbiota composition) was deduced from the coincidence between the red and green lines.  
948 As an example, the heritability of microbiome composition for data series F7-D120 was  
949 assumed to be close to 0.8. We proceeded in the same way for the across generation analysis  
950 (Suppl. Fig. 7C). We used the actual measures of kinship across the F6 and F7 generations  
951 computed with GEMMA. We standardized them (mean 0 and SD 1), and then scaled them  
952 such that the values for an individual with itself would center on 1, and for full-sibs on 0.5.  
953 Breeding values and environmental effects were sampled using *mvrnorm* and *rnorm* as above.  
954 As the number of individuals is much higher in these analyses we only performed 100  
955 simulations.  
956

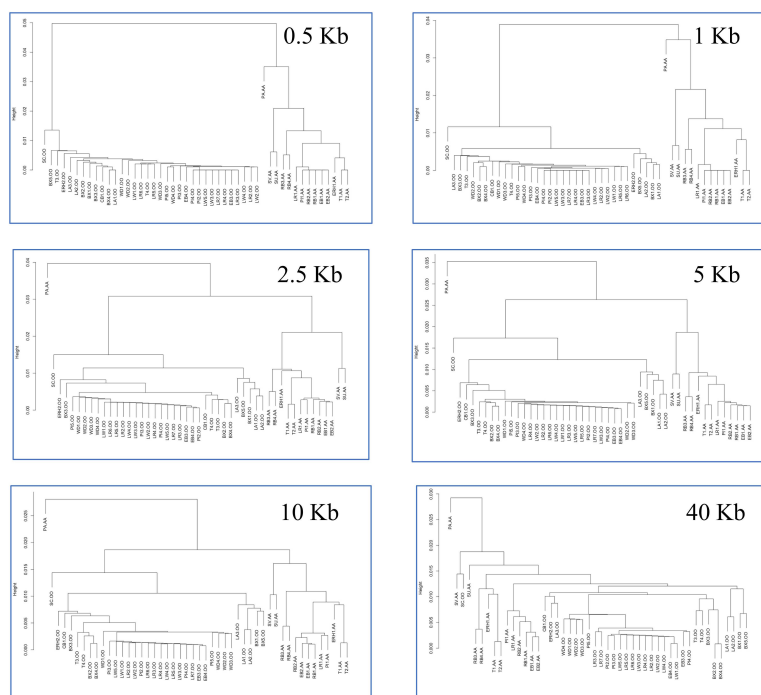

957

958 **Supplemental Figure 8:** UPGMA tree based on nucleotide diversities between 14 AA and 34  
959 OO animals in windows of increasing size (0.5 to 40-Kb) centered on the 2.3 Kb deletion in the  
960 ABO gene (porcine O allele). PA: *Phacochaerus Africanus*, SC: *Sus cebifrons*, SV: *Sus verrucosus*,  
961 SU: *Sus scrofa vittatus*, CB: Chinese wild boar, RB: Russian wild boar, EB: European wild boar,  
962 ERH: Erhualian, BX: Bamaxiang, T: Tibetan, LA: Laiwu, LR: Landrace, LW: Large White, PI:  
963 Piétrain, WD: White Duroc.

964

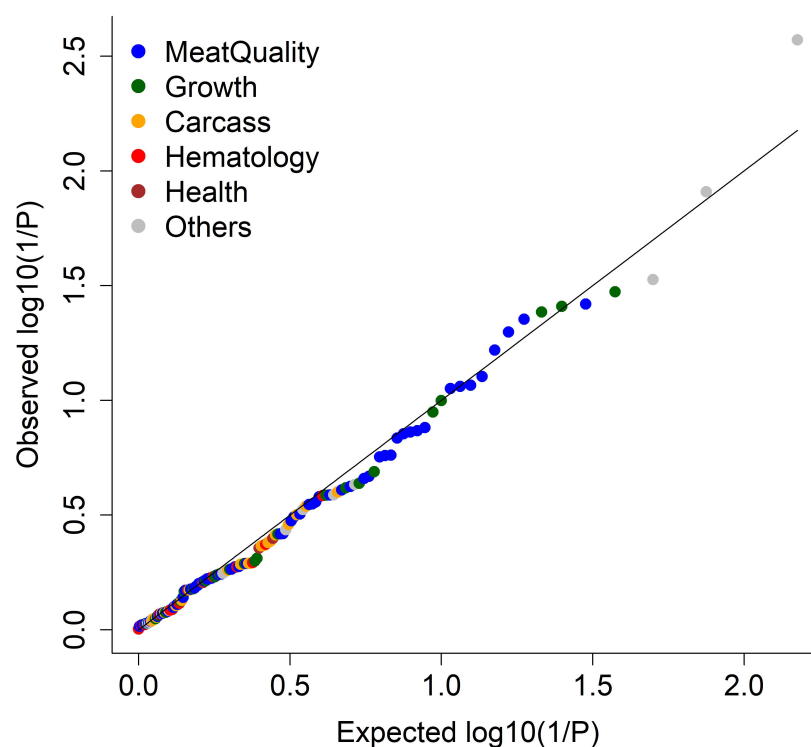

965

966 **Supplemental Figure 9:** QQ plots for the effect of AO genotype on 150 phenotypes pertaining  
967 to meat quality, growth, carcass composition, hematology, health, and other phenotypes in  
968 the F6 and F7 generation. The p-values were obtained by meta-analysis (weighted Z score)  
969 across the F6 and F7 generations.

970

## 971 **STAR METHODS**

972 **Animal rearing and sample collection.** This study focused on the sixth (F6) and seventh (F7)  
973 generation of a mosaic population generated as follows. An average of 3.6 boars (range: 3 -  
974 4) and 4 sows (range: 2 - 5) from four indigenous Chinese pig breeds (Erhualian (EH),  
975 Bamaxiang (BX), Tibetan (TB), Laiwu (LA)) and four commercial European/American pig  
976 breeds (Landrace (LD), Large White (LW), Duroc (WD) and Piétrain (PT)) were successfully  
977 applied in the mating design, thus, constituted the F0 generation. For each Chinese breed, the  
978 boars were mated with the ewes of one European breed, and the sows with the boars of another  
979 European breed to produce the F1 generation. Thus, every Chinese and every European breed  
980 is parent breed of two distinct F1 hybrid combinations each, for a total of eight F1 combinations  
981 (BX-LW, BX-PT, LA-PT, LA-LD, TB-LD, TB-WD, EH-WD, EH-LW). The F2 generation  
982 was obtained by mating each F1 hybrid combination with two others that did not share parental  
983 breeds for a total of eight F2 combinations (BX-LW x LA-PT, BX-PT x LA-LD, LA-PT x TB-  
984 LD, LA-LD x TB-WD, TB-LD x EH-WD, TB-WD x EH-LW, EH-WD x BX-LW, EH-LW x  
985 BX-PT). Every F2 combination was obtained by reciprocally crossing an average of 4 boars  
986 from one F1 combination with an average of 7.25 sows from the other. The F3 generation was  
987 obtained by mating each of the eight F2 hybrid combinations with the only complementary F2  
988 combination that did not share any parental breeds for a total of four F3 combinations (BX-  
989 LW-LA-PT x TB-LD-EH-WD, BX-PT-LA-LD x TB-WD-EH-LW, LA-PT-TB-LD x EH-  
990 WD-BX-LW, LA-LD-TW-WD x EH-LW-BX-PT) expected to each have ~12.5% of their  
991 genome from each of the founder breeds. Every F3 combination was obtained by reciprocally  
992 crossing an average of 7 boars from one F2 combination with an average of 10.8 sows from  
993 the complementary one. The F4, F5, F6 and F7 generations were obtained by intercrossing 57  
994 boars x 75 sows (F3->F4), 62 boars x 97 sows (F4->F5), 85 boars x 170 sows (F5->F6), and  
995 82 boars x 111 sows (F6->F7)(Suppl. Table 1).

996 All F6 and F7 animals were born and reared at the experimental farm of the National Key  
997 Laboratory for swine Genetic Improvement and Production Technology, Jiangxi Agricultural  
998 University (Nanchang, Jiangxi) under standard and uniform housing and feeding conditions.



999 Piglets remained with their mother during the suckling period and were weaned at ~46 days of  
1000 age. Litters were transferred to 12-pig fattening pens with automatic feeders (Osborne  
1001 Industries, US), minimizing splitting and merging of litters. All pigs were fed twice per day  
1002 with formula diets containing 16% crude protein, 3,100 kJ digestible energy, 0.78% lysine, 0.6%  
1003 calcium and 0.5% phosphorus. Water was available ad libitum from nipple drinkers. Males  
1004 were castrated at 80 days. Fecal samples were manually collected from the rectum of  
1005 experimental pigs at the ages of 25, 120 and 240 days, dispensed in 2ml tubes, flash frozen in  
1006 liquid nitrogen, and stored at -80°C. Animals were slaughtered at day 240. Ileum and cecum  
1007 were sealed at both ends with a sterile rope and extracted from the carcass. Within 30 min after  
1008 slaughter, ileal and cecal luminal content were collected (F6 and F7 animals), ileum and cecum  
1009 rinsed with sterile saline solution, and samples of ileal and cecal mucosa scraped with a sterile  
1010 microscopic slide (F7 animals only). Approximately one gram of content or scrapings was  
1011 packed in 2-ml sterile freezer tubes, flash frozen in liquid nitrogen, and stored at -80°C. The  
1012 number of samples of the different types available for further analysis are provided in Suppl.  
1013 Table 2. All the animals included in the analyses were healthy and did not receive any  
1014 antibiotic treatment within one month of sample collection. All procedures involving animals  
1015 were carried out according to the guidelines for the care and use of experimental animals  
1016 established by the Ministry of Agricultural and Rural Affairs and Jiangxi Agricultural  
1017 University.

1018  
1019 **Genotyping by sequencing of the F0, F6 and F7 generations.** Genomic DNA was extracted  
1020 from ear punches using a standard phenol-chloroform-based DNA extraction protocol. DNA  
1021 concentrations were measured using a Nanodrop-1000 instrument (Thermo Scientific, USA),  
1022 and DNA quality of all samples assessed by agarose (0.8%) gel electrophoresis. Genomic DNA  
1023 was sheared to 300-400 bp fragment size. 3'-ends were adenylated and indexed primers ligated.  
1024 Libraries were amplified by PCR using Phusion High-Fidelity DNA polymerase (NEB, USA)  
1025 following the recommendations of the manufacturer (Illumina, US). The libraries were loaded  
1026 on Illumina X-10 instruments (Illumina Inc., San Diego, CA) for 2 × 150 bp paired-end  
1027 sequencing by Novogene (Beijing, China). We removed reads with quality score  $\leq 20$  for  $\geq 50\%$   
1028 of bases or  $\geq 10\%$  missing ("N") bases. Read quality was checked using Fastqc  
1029 (<http://www.bioinformatics.babraham.ac.uk/projects/fastqc/>). Clean reads were aligned to the  
1030 *Sus scrofa* reference genome assembly 11.1 (Warr et al., 2019) using BWA (Li & Durbin,  
1031 2010). Bam files of mapped reads were sorted by chromosome position using SAMTools (Li

1032 et al., 2009). Indel realignment and marking of duplicates were done with Picard  
1033 (<http://broadinstitute.github.io/picard>). Individual genotypes were called from BAM files  
1034 using Platypus (v0.8.1) (Rimmer et al., 2014). Individual genotypes were merged into a single  
1035 VCF file using PLINK (v1.9) (Chang et al., 2015) encompassing a total of 39.3 million variants  
1036 including 31,094,663 SNPs and 8,266,390 INDELs. Missing genotypes were imputed with  
1037 Beagle (v.40) (Browning & Browning, 2007). Genomic variants with minor allele frequencies  
1038 (MAF) < 0.03 were removed.

1039

1040 **Computing nucleotide diversities.** Nucleotide diversities between pairs of breeds were  
1041 computed from variant frequencies as follows:

1042 
$$\pi_i = \left( \sum_{j=1}^{n_i} 1 - (f_{ij}^A \times f_{ij}^B) - ((1 - f_{ij}^A) \times (1 - f_{ij}^B)) \right) / w$$

1043 where  $\pi_i$  is the nucleotide diversity in window  $i$ ,  $n_i$  is the number of variants in window  $i$ ,  $f_{ij}^A$   
1044 is the frequency of variant  $j$  of window  $i$  in breed A,  $f_{ij}^B$  is the frequency of variant  $j$  of window  
1045  $i$  in breed B, and  $w$  is the size of the windows in base pairs. The overall nucleotide diversity  
1046 for a pair of breeds A and B was computed as the average of  $\pi_i$  across all windows. The  
1047 numbers reported are averages of overall nucleotide diversities for multiple pairs of breeds  
1048 (within European, within Chinese, between European, between Chinese, between European  
1049 and Chinese), computed for a window size of 1 million base pairs.

1050

1051 **Estimating the contribution of the eight founder breeds in the F6 and F7 generation at**  
1052 **genome and chromosome level.** We estimated the proportion of the genome of the eight  
1053 founder breeds in the F6 and F7 generation following Coppieters et al. (2020). Assume that  
1054 the total number of variants segregating in the mosaic population is  $n_T$ . Each of these variants  
1055 has a frequency in each one of the founder breeds which we denote  $f_1^{0.1} \rightarrow f_{n_T}^{0.1}$  for breed 1,  
1056  $f_1^{0.2} \rightarrow f_{n_T}^{0.2}$  for breed 2, etc ... as well as a frequency in the F6 (or F7) generation which we  
1057 refer to as  $f_1^6 \rightarrow f_{n_T}^6$ . We assume that there is a total of  $B$  breeds. We denote the proportion of  
1058 the genome of breed 1 in generation F6 (or F7) as  $P_1$ , of breed 2 in generation F6 (or F7) as  $P_2$ ,  
1059 etc ... We estimated the values of  $P_1$ ,  $P_2$ , etc. ... using a set of linear equations:

1060

1061 
$$f_1^6 = \sum_{j=1}^B (P_j \times f_1^{0.j})$$

1062

⋮

1063 
$$f_i^6 = \sum_{j=1}^B (P_j \times f_i^{0,j})$$

1064 
$$\vdots$$

1065 
$$f_{n_T}^6 = \sum_{j=1}^B (P_j \times f_{n_T}^{0,j})$$

1066

1067 We used standard least square methods (lm function in R) to find the solutions of  $P_j$  that  
1068 minimize the residual sum of squares. This was done for the entire genome, as well as by  
1069 autosome.

1070

1071 **16S rRNA data collection and processing.** Microbial DNA was extracted from feces,  
1072 luminal content and mucosal scrapings using the QIAamp Fast DNA stool Mini Kit following  
1073 the manufacturer's recommendations (Qiagen, Germany). DNA concentrations were measured  
1074 using a Nanodrop-1000 instrument (Thermo Scientific, USA), and DNA quality assessed by  
1075 agarose (0.8%) gel electrophoresis. The V3 - V4 hypervariable region of the 16S rRNA gene  
1076 was amplified with the barcode fusion primers (338F: 5-ACTCCTACGGGAGGCAGCAG-3,  
1077 806R: 5-GGACTACHVGGGTWTCTAAT-3) with 56 °C annealing temperature. After  
1078 purification, PCR products were used for constructing libraries and sequenced on an Illumina  
1079 MiSeq platform (Illumina, USA) at Major bio (Shanghai, China). The 16S rRNA sequencing  
1080 data were submitted to the CNGB database and have accession number CNP0001069. The raw  
1081 16S rRNA gene sequencing reads were demultiplexed and primer and barcode sequences  
1082 trimmed using Trimmomatic (V.0.39) (Bolger et al., 2014). Reads with  $\geq 10$  consecutive same  
1083 or ambiguous bases were eliminated. Clean paired-end reads were merged (minimum 10 bp  
1084 overlap) into tags using FLASH (v.1.2.11) (Magoc & Salzberg, 2011). The average number of  
1085 tags per sample was  $\sim 40,888$  (Suppl. Table 2). Chimeric reads were removed using  
1086 USEARCH (v.7.0.1090) (Edgar, 2010). Sequence data were rarefied to 19,631 tags, i.e. the  
1087 lowest number of tags per sample. Tags were clustered in operational taxonomic units (OTUs)  
1088 with VSEARCH (v.2.8.1) (Rognes et al., 2016) using 97% similarity threshold. OTUs that  
1089 would not have  $\geq 3$  reads in at least two samples or were detected in  $\leq 0.2\%$  of the samples  
1090 were ignored. In the end, 12,054 OTUs accounting for an average of 98.7% of total reads per  
1091 sample were used for further analysis. OTUs were matched to taxa using the Greengenes (v13.5)  
1092 database and the RDP classifier (v2.2) (Wang et al., 2007). Principal coordinate analysis  
1093 (PCoA) was performed with the "ape" and "vegan" R packages using Bray-Curtis  
1094 dissimilarities. Shannon's index was used as  $\alpha$ -diversity metric and computed using mothur (v  
1095 1.43.0) (Schloss et al., 2009). Bray-Curtis dissimilarity was used as  $\beta$ -diversity metric and

1096 computed using `vegdist` of the `vegan` package in R. The mouse fecal microbiome data were  
1097 from Cheema et al. (2019). The human fecal microbiome data were 16S rRNA data from 106  
1098 healthy individuals (Shagam et al., in preparation).

1099

1100 **Measuring the heritability of microbiome composition.** We first estimated the impact of  
1101 host genetics on the composition of the intestinal microbiome by measuring the correlation  
1102 between genome-wide kinship and microbiome dissimilarity. We computed genome-wide  
1103 kinship ( $\Theta$ ) for all pairs of relevant individuals (see hereafter) using the SNP genotypes at the  
1104 above-mentioned 30.2 million DNA variants using either GEMMA (Zhou & Stephens, 2012)  
1105 or GCTA (Yang et al., 2011). Both programs yielded estimates of  $\Theta$  with same distribution  
1106 after standardization, albeit different raw values. We herein report results obtained with  
1107 GEMMA. Microbiome dissimilarity was measured using the Bray-Curtis dissimilarity  
1108 computed using the “`vegan`” R function (Dixon, 2003) and abundances of all OTUs. We  
1109 computed Spearman’s (rank-based) correlations using the “`corrttest`” function in R (v3.5.3).  
1110 We first performed this analysis for each trait and generation separately within litter, i.e. only  
1111 considering pairs of full-sibs born within the same litter, hence in essence following Visscher  
1112 et al. (2006). We then performed the analysis across the F6 and F7 generations. The pairs of  
1113 individuals considered were all F6-F7 animal pairs except sow-offspring. To account for  
1114 dependencies characterizing the data the statistical significance of the obtained correlations  
1115 was determined empirically by permutation testing (1,000 permutations): vectors of OTU  
1116 abundances were permuted within litters, Bray-Curtis distances recomputed, and correlated  
1117 with the unpermuted kinships. The empirical p-value was determined as the proportion of  
1118 permutations that yielded a Spearman’s correlation that was as low or lower than that obtained  
1119 with the real data. Spearman’s correlation coefficients were then adjusted to match the  
1120 empirical p-values as follows. We generated “breeding values” for all animals used in Fig. 3  
1121 by sampling from a multivariate normal distribution which variance corresponding to the  
1122 simulated heritability ( $h^2$ ) and covariance matrix constrained by the actual pairwise kinship  
1123 coefficients using the `mvrnorm` R function. We added environmental effects to the breeding  
1124 values (yielding phenotypic values) sampled from a normal distribution with mean 0 and  
1125 variance  $(1 - h^2)$  using the `rnorm` R function. We then computed the corresponding  
1126 Spearman’s correlation between the pairwise genetic distances and the absolute value of the  
1127 pairwise phenotypic differences using the `cor.test(method=”spearman”)` R function. The  
1128 corrected Spearman’s correlation was then chosen as the one obtained with the simulated data

1129 set (out of 5,000) that yielded a one-sided p-values that was the closest one to the p-value  
1130 obtained by permutation with the corresponding real data set. See also legend to Supplemental  
1131 Figure 7.

1132 Heritabilities of uncorrected abundances of specific taxa were estimated using a linear mixed  
1133 model implemented with GEMMA (Zhou & Stephens, 2012). The model included a random  
1134 polygenic and error effect and no fixed effects. Variance components were estimated with  
1135 GEMMA. Analyses were conducted separately for the 12 data series. To obtain unbiased  
1136 estimates of  $h^2$ , we repeated the analysis 1,000 times after permutation of the taxa abundances  
1137 within litter. The average  $h^2$  obtained across permuted datasets was subtracted from the  $h^2$   
1138 obtained with the real (i.e. unpermuted) data to yield an unbiased estimate  $\widehat{h^2}$ . The statistical  
1139 significance of  $\widehat{h^2}$  was estimated as the proportion of permutations that would yield a value of  
1140  $h^2$  that would be as high or higher than the value of  $h^2$  obtained with the real data. To provide  
1141 further support for the validity of the  $h^2$  estimates, we measured Spearman's correlation  
1142 between F6 and F7 estimates (both  $h^2$  and corresponding  $-\log(p)$  values) computed with the  
1143 `corr.test` R function. The "total heritability" of the intestinal microbiome was further computed  
1144 from the heritabilities of individual taxa abundance following Rothschild et al. (2018).

1145  
1146 **Mapping microbiota QTL (mQTL).** mQTL were mapped using the GenABEL R package  
1147 (Aulchenko et al., 2007) applying two models following Turpin et al. (2016). The first fitted  
1148 a linear regression between allelic dosage and  $\log_{10}$ -transformed taxa abundance. It was  
1149 applied to all SNPs with  $MAF \geq 0.05$  (in the corresponding data series) and taxa with non-null  
1150 abundance in at least 20% of samples (in the corresponding data series), ignoring samples with  
1151 null abundance if those represented more than 5% of samples. The second fitted a logistic  
1152 regression model between allelic dosage and taxon presence/absence in the corresponding  
1153 sample (binary model). It was applied to all SNPs with  $MAF \geq 10\%$  (in the corresponding  
1154 data series) and taxa present in  $\geq 20\%$  and  $\leq 95\%$  of samples (in the corresponding data series).  
1155 Both models included sex, slaughter batch (21 for F6, 23 for F7) and the three first genomic  
1156 principal components as fixed covariates. GWAS were conducted separately for each taxon x  
1157 data series combination and p-values concomitantly adjusted for residual stratification by  
1158 genomic control. P-values were combined across traits and/or taxa using a z-score. P-values  
1159 were converted to signed z-values using the inverse of the standard normal distribution and  
1160 summed to give a "z-score". Z-scores were initially calculated using METAL (Willer et al.,  
1161 2010). To compute the p-value of the corresponding Z-score while accounting for the

1162 correlation that exists between the phenotypic values of a given cohort across traits we also  
1163 computed the genome-wide (i.e. across all tested SNPs) average ( $\bar{Z}$ ) and standard deviation ( $\sigma_Z$ )  
1164 of the Z score. The p-value of Z scores was (conservatively) computed by assuming that  
1165  $(Z - \bar{Z})/\sigma_Z$  is distributed as  $N(0,1)$  under the null hypothesis. Both approaches yielded similar  
1166 results.

1167

1168 **De novo assembly of the A allele of the porcine ABO acetyl-galactosaminyl transferase**  
1169 **gene.**

1170 We extracted high-quality genomic DNA from longissimus dorsi of a Bamaxiang female using  
1171 a phenol-chloroform-based extraction method (Novogene Biotech, Beijing, China). A 40 kb  
1172 SMRTbell DNA library (Pacific Biosciences of California, CA, USA) was prepared using  
1173 BluePippin for DNA size selection (Sage Science, MA, USA) and then sequenced on a PacBio  
1174 Sequel platform (Pacific Biosciences of California, CA, USA) with P6/C4 chemistry at  
1175 Novogene Biotech, Beijing, China. We obtained a total of 18,148,470 subreads with N50  
1176 length of 17,273 bp. Additionally, a paired-end library with insert size of 350-bp was  
1177 constructed and sequenced on an Illumina Novaseq 6000 PE150 platform (2x150bp reads) at  
1178 Novogene Biotech, Beijing, China. PacBio reads were self-corrected using Canu (v1.7.1)  
1179 before assembly with Flye (v2.4.2) (Kolmogorov et al., 2019). Errors in the primary assembly  
1180 were first corrected using PacBio subreads using racon (v1.4.10)(Vaser et al., 2017), and  
1181 Illumina paired-end reads were then mapped to the contigs using bwa-mem (Li, 2013) to polish  
1182 the contigs using Pilon (v1.23, Broad Institute, MA, USA) (Walker et al., 2014). Lastz (Harris,  
1183 2007) and Minimap2 (v2.17-r941) (Li, 2018) were used to compare the Bamaxiang contig and  
1184 the 40k sequence spanning the ABO gene of the *Sus scrofa* Build 11.1 reference genome.

1185

1186 **Developing a PCR assay to distinguish AA, AO and OO pigs.** We designed two pairs of  
1187 primers to genotype the deletion in the F6 and F7 populations. The first pair of primers was  
1188 located within intron 7 of the ABO gene and downstream of the deletion (FP: 5'-  
1189 GAGTTCCCCTTGTGGCTCAGT-3', RP: 5'- TTGCCTAAGTCTACCCCTGTGC-3'). The  
1190 second pair of primers was located in exon 8 (FP2: 5'-CGCCAGTCCTTCACCTACGAAC-  
1191 3', RP2: 5'-CGGTTCCGAATCTCTGCGTG-3'). PCR amplification was performed in a 25-  
1192  $\mu$ l reaction containing 50 ng genomic DNA and 1.5 U of LA Taq DNA polymerase (Takara,  
1193 Japan) under thermocycle conditions of 94°C for 4 minutes, 35  $\times$  (94°C for 1 min, 1 min at

1194 specific annealing temperature for each set of primers and 72°C for 2 min), and 72°C for 10  
1195 minutes on a PE 9700 thermal cycler (Applied Biosystem, USA).

1196

1197 **RNA seq and eQTL analysis.** A total of 300 cecum tissue samples from F7 pigs which also  
1198 had microbiota and genotype data were used to extract total RNA with TRIzol™ (Invitrogen,  
1199 USA) following the manual. Total RNA was electrophoresed on 1% agarose gel. RNA purity  
1200 and integrity were assessed using an eNanoPhotometer® spectrophotometer (IMPLEN, USA)  
1201 and a Bioanalyzer 2100 system (Agilent Technologies, USA). Qubit3.0 Fluorometer was used  
1202 to measure RNA concentration. 2-µg total RNA of each sample were used to constructed RNA  
1203 sequencing libraries, using the NEBNext® UltraTMR NA Library Prep Kit for Illumina (NEB,  
1204 USA) following the manufacturer's protocol. Briefly, Oligo (dT) magnetic beads (Invitrogen,  
1205 USA) were used to enrich mRNA, which was then fragmented using a fragmentation buffer  
1206 (Ambion, USA). cDNA was synthesized by using 6-bp random primers and reverse  
1207 transcriptase (Invitrogen, USA). After purification, cDNA was end-repaired, and index codes  
1208 and sequencing adaptors ligated. After PCR amplification, purification and quantitation, the  
1209 libraries were sequenced on a Novaseq-6000 platform using 2×150-bp paired-end sequencing.  
1210 Clean data were obtained by removing adapter reads, poly-N and low-quality reads from raw  
1211 data. Cleaned reads from each sample were mapped to the complete ABO sequence from the  
1212 Bamaxiang reference genome with the A allele at the ABO locus constructed by the authors  
1213 using STAR (Dobin et al., 2013). Samtools (Li et al., 2009) was used to convert SAM format  
1214 to BAM format. The read counts mapping to ABO (exon 1 to 7) were quantified for each  
1215 sample using featureCounts (Liao et al., 2014). To adjust for the effect of sequencing depth,  
1216 the expression abundance of ABO gene was normalized to fragments per kilobase of exon  
1217 model per million mapped reads (FPKM). Gender and batch were treated as covariates to  
1218 correct for gene expression levels, and the corrected residuals used for subsequent analyses.  
1219 GEMMA (Zhou & Stephens, 2012) was used to analyze the association of ABO expression  
1220 level with genome-wide variants using a linear mixed model.

1221

1222 **Whole-genome sequencing and bioinformatic analysis for wild boars, *Sus verrucosus* and**  
1223 ***Sus cebifrons*.** The genomes of six Russian wild boars, one Sumatran wild boar, and one  
1224 African warty hog were sequenced on an Illumina HiSeq X Ten platform at Novogene Biotech,  
1225 Beijing, China. Additionally, six Chinese wild boars were sequenced in a previous study (Ai  
1226 et al. 2015), and we downloaded the genome sequence data for eight other pigs from NCBI.  
1227 Finally, we used a total of 22 genomes to call SNPs in the porcine ABO gene using GATK

1228 (Van der Auwera et al., 2013). We replaced the ABO gene of the *Sus scrofa* build 11.1 genome  
1229 with the 50 Kb Bamaxiang contig sequence containing the A allele of ABO gene. The cleaned  
1230 reads of the 22 individuals were aligned to the modified *Sus scrofa* reference genome (build  
1231 11.1) using BWA (Li and Durbin, 2010).

1232

1233 **Phylogenetic analysis of the O alleles in the *Sus* genus.** We applied GATK to perform indel  
1234 realignment, and proceeded to SNP and INDEL discovery and genotyping with  
1235 UnifiedGenotyper across all 83 samples simultaneously using standard hard filtering  
1236 parameters according to GATK Best Practices recommendations (DePristo et al., 2011). We  
1237 restricted the analysis to the 14 AA and 34 OO animals (Fig. 5C), hence circumventing the  
1238 need to phase the corresponding genotypes. We defined windows of varying size (0.5 to 50Kb)  
1239 centered around the 2.3 Kb deletion. For all pairs of individuals, we computed a running sum  
1240 over all variants in the window adding 0 when both animals had genotype AA\_(alternate) or  
1241 RR(reference), 1 when one animal was AA and the other RR, and 0.5 in all other cases. The  
1242 nucleotide diversity for the corresponding animal pair was then computed as the running sum  
1243 divided by the window size in bp. We ignored the variants located in the 2.3 Kb deletion in  
1244 this computation. The ensuing matrix of pair-wise nucleotide diversities was then used for  
1245 hierarchical clustering and dendrogram construction using the `hclust(method="average")` R  
1246 function corresponding to the unweighted pair group method with arithmetic mean (UPGMA).

1247

1248 **Analysis of population differentiation.** We quantified the degree of population differentiation  
1249 by computing the effect of breed on the variance of allelic dosage using a standard one-way  
1250 ANOVA fixed effect model and a F-statistic computed as the ratio of the “between breed mean  
1251 squares” (BMS) and “within breed mean squares” (WMS) (Weir & Cockerham, 1984). BMS  
1252 and WMS were computed as:

1253 
$$BMS = \left( \sum_{i=1}^B \sum_{j=1}^{n_i} (\bar{y}_i - \bar{y}_T)^2 \right) / (B - 1)$$

1254 
$$WMS = \left( \sum_{i=1}^B \sum_{j=1}^{n_i} (y_{ji} - \bar{y}_i)^2 \right) / (N_T - B)$$

1255 where  $y_{ij}$  is the allelic dosage of the alternate allele in individual  $j$  (of  $n_i$ ) of breed  $i$  (of  $B$ ),  $\bar{y}_i$   
1256 is the average allelic dosage in breed  $i$  (of  $B$ ), and  $\bar{y}_T$  is the average allelic dosage in the entire  
1257 data set. We computed the average of the corresponding F-statistic for all variants within a  
1258 sliding window of fixed physical size (f.i. 2-Kb in Fig. 5E), and took the inverse of this mean  
1259 as measure of population “similarity”. The corresponding profiles were nearly identical to



1260 those obtained by computing average  $F_{ST}$  values across variants (and taking the inverse)  
1261 following Nei (1977).

1262

### 1263 **Determination of the concentration of N-acetyl-galactosamine in cecal lumen**

1264 Targeted LC-MS/MS analysis was performed to determine the concentration of N-acetyl-  
1265 galactosamine in cecal lumen samples using a liquid chromatography mass spectrometry  
1266 system comprising an ExionLC<sup>TM</sup> AD System (AB Sciex, USA) coupled to a TripleTOF<sup>TM</sup>  
1267 5600 Mass Spectrometer (AB Sciex, USA). Cecal lumen samples used for measurement of N-  
1268 acetyl-galactosamine were harvested from F7 pigs which had microbial composition data and  
1269 were used for GWAS. The samples were thawed from -80°C. Approximately 0.2g of each  
1270 sample was homogenized in double-distilled water and centrifuged (5000 r.p.m., 3min; 12000  
1271 r.p.m., 20min, at 4°C). The supernatants were filtered and submitted to measurement on the  
1272 LC-MS/MS instrument. Separation was performed in a 2.1 x 100mm, 1.7µm ACQUITY UPLC  
1273 BEH C18 Column (Waters, USA). DuoSpray-MS/MS was performed in positive ion mode  
1274 with two scan events: MS and MS/MS scan with mass range of m/z 100-1000 and 100-250,  
1275 respectively. In the product ion, the ionspray voltage was set at 5.5kV, the temperature was  
1276 maintained at 500°C, and the collision energies were optimized from ramping experiments. In  
1277 addition, the standard substance of N-acetylgalactosamine (Aladdin, China) solutions were  
1278 applied to LC-MS/MS to determine the peak elution time and m/z value of precursor ion and  
1279 product ion as a reference.

1280

1281 **Isolating 4-8-110 and 4-15-1.** Fecal samples were collected from the rectum of healthy pigs  
1282 at about 120 days and transferred immediately to anaerobic conditions. Fresh samples were  
1283 homogenized with sterile 1 × PBS (pH7.0) in an anaerobic glovebox (Electrotek, UK), which  
1284 contained 10% hydrogen, 10% carbon dioxide and 80% nitrogen. The fecal suspension was  
1285 diluted 10<sup>-6</sup>, 10<sup>-7</sup>, 10<sup>-8</sup> and 10<sup>-9</sup> -fold, and plated on GAM medium (Nissui Pharmaceutical,  
1286 Japan). Plates were incubated at 37°C for 3 days in an anaerobic glovebox. Single clones were  
1287 picked and streaked until pure colonies were obtained on GAM medium. Full-length 16S rRNA  
1288 gene sequencing was performed after amplification using primers (27 forward: 5'-  
1289 AGAGTTTGATCCTGGCCTCAG-3' and 1492 reverse: 5'-GGTTACCTTGTTACGACTT-

1290 3'). The isolates were stored at -80 °C in GAM broth containing 16% of glycerol until further  
1291 use.

1292

1293 **Oxford nanopore sequencing.** The strains 4-8-110 and 4-15-1 were recovered on GAM  
1294 medium. Cells were harvested at the period of logarithmic growth. Genomic DNA was  
1295 extracted using the Blood & Cell Culture DNA Midi Kit (Qiagen, Germany) following the  
1296 manufacturer's protocol. Libraries for whole-genome sequencing of the strains were  
1297 constructed and sequenced on an ONT PromethION (Oxford Nanopore Technology, UK) at  
1298 NextOmics (Wuhan, China). To correct sequencing errors, a library for second-generation  
1299 sequencing was also constructed for each of the two strains and sequenced (2x100 bp) on a  
1300 BGISEQ platform (BGI, China). Bioinformatic analyses of sequencing data were performed  
1301 following Kolmogorov et al. (2019) and Hunt et al. (2015). In brief, after quality control, the  
1302 sequence data were assembled with flye (Kolmogorov et al., 2019) with parameter: --nano-raw,  
1303 and the assembled genomes were corrected by combining the Oxford Nanopore data with the  
1304 second-generation sequencing data using pilon under default parameter. The encoded genes  
1305 were predicted using prodial (parameter: -p none-g 11) (Hyatt et al., 2010).

1306

1307 **MAGs assembly.** A total of 92 fecal samples from eight pig populations, four intestinal  
1308 locations and different ages were used for metagenomic sequencing and construction of  
1309 metagenome-assembled genomes (MAGs). Microbial DNA was extracted as described above.  
1310 The libraries for metagenomic sequencing were constructed following the manufacturer's  
1311 instructions (Illumina, USA), with an insert size of 350 base pairs (bp) for each sample, and  
1312 2x150 bp paired-ends sequenced on a Novaseq 6000 platform. Raw sequencing data were  
1313 filtered to remove adapter sequences and low-quality reads using fastp (v0.19.41) (Chen et al.,  
1314 2018). Host genomic DNA sequences were filtered out using BWA (V.0.7.17) (Li & Durbin,  
1315 2010). The clean reads of each sample were assembled into contigs using MEGAHIT (v1.1.3)  
1316 with the option '--min-count 2 --k-min 27 --k-max 87 --k-step 10 --min-contig-len 500' (Li et  
1317 al., 2016). Single-sample metagenomic binning was performed with two different binning  
1318 algorithms '--metabat2 --maxbin2' using the metaWRAP package (Uritskiy et al., 2018). The  
1319 bins (metagenomic assembly genomes, MAGs) generated by the two binning algorithms were  
1320 evaluated for quality and combined to form a MAG set using the bin\_refinement module in  
1321 metaWRAP. Metagenomic sequences were further assembled to optimized MAGs using the  
1322 reassemble\_bins module of metaSPAdes in the metaWRAP pipeline. CheckM was used to

1323 estimate the completeness and contamination of each MAG (Parks et al., 2015). The MAGs  
1324 with completeness <50% and contamination >5% were filtered out. Non-redundant MAGs  
1325 were generated by dRep (v2.3.2) at threshold of 99% average nucleotide identity (ANI) (Olm  
1326 et al., 2017). The metagenomic sequencing data were submitted to the CNGB database and  
1327 have accession number CNP0000824.

1328

1329 **Bioinformatic analyses of GalNAc catabolic pathway.** Gene prediction in MAGs was  
1330 carried out using the annotate\_bins module in metaWRAP. The FASTA file of amino acid  
1331 sequences translated from coding genes was used to perform KEGG annotation using Ghost  
1332 KOALA tool (Kanehisa et al., 2016) on the KEGG website (<https://www.kegg.jp/ghostkoala/>).  
1333 Taxonomic classification of MAGs was performed using PhyloPhlAn (v.0.99) (Segata et al.,  
1334 2013). The graphs in Fig. 6B and 6C were generated using custom made perl and R scripts.  
1335 Pathway and regulon scores were computed using a custom-made perl script. Both scores  
1336 included (i) one point for import (having orthologues of either the four components of AgaPTS  
1337 (agaE, agaF, agaV and agaW) and/or the three components of the TonB dependent transporter  
1338 (omp, agaP and agaK) and /or the four components of the GnbPTS transporter (gnbA, gnbB,  
1339 gnbC and gnbD), (ii) one point for GalNAc deacetylase activity (having an orthologue of agaA  
1340 and/or nagA), (iii) one point for GalN deaminase/isomerase (having on orthologue of agaS),  
1341 (iv) one point for tagatose-6-P kinase (having an orthologue of pfkA and/or lacC and/or fruK),  
1342 and (v) one point for tagatose-1,6-PP aldolase (having an orthologue of gatY and/or gatZ and/or  
1343 lacD and/or fba). For the pathway score the orthologues could be located anywhere in the  
1344 MAG, for the regulon score they had to be located on the same sequence contig and in close  
1345 proximity (2.5% of genome size) to the anchor gene agaS (Ravcheev & Tiele, 2017). For the  
1346 top hits we manually checked whether proximity was confirmed either by the replication of the  
1347 order in more than one MAG and/or by the colocalisation of the genes on one and the same  
1348 sequence contig. The effect of MAG-type (OTU476-like, Erysipelotrichaceae and others), -  
1349 completion, -contig, -genome size on pathway and regulon scores were estimated using the R  
1350 lm function, and were highly significant. The p-values for the Erysipelotrichaceae versus Other  
1351 contrast were directly obtained from the lm function. To (conservatively) estimate the p-value  
1352 of the OTU476-like versus [Erysipelotrichaceae + Others] we generated score residuals  
1353 corrected for completion, contig number and genome size and determined how many MAGs  
1354 had scores as high or higher than the OTU476-like strains. The p-values reported in Fig. 6B  
1355 correspond to the square of these proportions as there are two OTU476-like strains with same  
1356 GalNAc cluster organization.

1357

1358 **Feeding experiment.** To assess the effect of N-acetyl-galactosamine on the growth of bacterial  
1359 strains 4-8-110 and 4-15-1 from Erysipelotrichaceae, a feeding experiment with  $\alpha$ -N-acetyl-  
1360 galactosamine was carried out in vitro. The OTU-476 like strains 4-8-110 and 4-15-1 were  
1361 recovered and cultured on GAM broth medium. 0.005%, 0.05%, 0.1%, 0.2% and 0.5% of N-  
1362 acetyl-galactosamine was added to the GAM broth medium, respectively. The GAM broth  
1363 medium without N-acetyl-galactosamine was used as control. The two strains were inoculated  
1364 in the above GAM broth medium and cultured at 37°C. The OD600 values of cultures at six  
1365 different time points (0, 18, 25, 37 and 42h for 4-8-110, and 0, 11, 16, 18 and 24 h for 4-15-1)  
1366 were measured using a UV Spectrophotometer (Yoke instrument, China). Student's test was  
1367 used to compare the abundance of the strains in GAM broth medium with and without N-  
1368 acetyl-galactosamine.

1369

1370 **Profiling ABO gene expression level at various adult and embryo tissues:** Total RNA was  
1371 extracted using Trizol from 15 tissues (lung, hypophysis, skin, spinal cord, liver, spleen, muscle,  
1372 hypothalamus, heart, blood, brain, cecum, stomach, duodenum and kidney) collected from an  
1373 adult Bamaxiang sow and a Duroc pig embryo (day 75). RNA quality was monitored by  
1374 agarose (1%) gel electrophoresis, and using the RNA Nano 6000 Assay Kit of the Bioanalyzer  
1375 2100 system (Agilent Technologies, CA, USA). RNA concentration was measured using  
1376 Qubit® RNA Assay Kit in Qubit® 2.0 Fluorometer (Life Technologies, CA, USA). 1- $\mu$ g total  
1377 RNA of each sample were used to construct RNA sequencing libraries. Sequencing libraries  
1378 were generated using TruSeq RNA Library Preparation Kit (Illumina, USA) following  
1379 manufacturer's recommendations and index codes were added to attribute sequences to each  
1380 sample. Briefly, mRNA was purified from total RNA using poly-T oligo-attached magnetic  
1381 beads. First strand cDNA was synthesized using random hexamer primer and M-MuLV  
1382 Reverse Transcriptase (RNase H-). Second strand cDNA synthesis was subsequently  
1383 performed using DNA Polymerase I and RNase H. Remaining overhangs were converted into  
1384 blunt ends via exonuclease/polymerase activities. After adenylation of 3' ends of DNA  
1385 fragments, Illumina adaptors were ligated. In order to select cDNA fragments of preferentially  
1386 350~400 bp in length, the library fragments were purified with AMPure XP system (Beckman  
1387 Coulter, Beverly, USA). PCR was performed with Phusion High-Fidelity DNA polymerase,  
1388 Universal PCR primers and Index (X) Primer. PCR products were purified (AMPure XP  
1389 system) and library quality was assessed on an Agilent Bioanalyzer 2100 system. Clustering

1390 of the index-coded samples was performed on a cBot Cluster Generation System using TruSeq  
1391 PE Cluster Kit v3-cBot-HS (Illumina) according to the manufacturer's instructions.  
1392 Sequencing was performed on an Illumina Novaseq platform and 150 bp paired-end reads were  
1393 generated. Reads were filtered obtained by removing adapter sequences, poly-N and low-  
1394 quality reads. Cleaned reads were mapped to the complete ABO sequence from the Bamaxiang  
1395 reference genome sequence using HISAT2 (Kim et al., 2019). Samtools (Li et al., 2009) was  
1396 used to convert SAM format to BAM format. The read counts mapping to ABO (exon 1 to 7)  
1397 were quantified for each sample using featureCounts (Liao et al., 2014). To adjust for the effect  
1398 of sequencing depth, the expression abundance of ABO gene was normalized to Transcripts  
1399 Per Million (TPM). Expression abundance of ABO was used to cluster and visualize the  
1400 expression level of the 15 tissues from an adult Bamaxiang sow and a Duroc pig embryo via  
1401 function `dist()`, `hclust()`, `as.dendrogram()` and `set()` implemented in R package `stats` and  
1402 `dendextend`.

1403

1404 **Association analysis of ABO blood group with human gut microbiota.** Human data used  
1405 correspond to the previously described CEDAR cohort (Momozawa et al, 2018). It included  
1406 300 healthy individuals of European descent that were visiting the University Hospital (CHU)  
1407 from the University of Liège as part of a national screening campaign for colon cancer. Blood  
1408 samples and intestinal biopsies (ileum, colon and rectum) were collected with full consent. For  
1409 microbiota analysis, DNA was extracted from biopsies using the QIAamp DNA Stool Mini Kit  
1410 (QIAGEN, Germany). Three 16S rRNA amplicons corresponding respectively to the V1-V2,  
1411 V3-V4 and V5-V6 variable regions were generated in separate PCR reactions and subjected to  
1412 paired-end (2x300bp) NGS sequencing on a MiSeq instrument (Illumina, USA) following  
1413 Canver et al., 2015 at the GIGA genomics core facility. Reads were QV20 trimmed from the  
1414 3' end, demultiplexed, primer sequences removed using the `bbduk` tool (BBMap – Bushnell B.  
1415 – [sourceforge.net/projects/bbmap/](https://sourceforge.net/projects/bbmap/)). Reads mapping to the human genome were eliminated  
1416 using the BBTools suite [[sourceforge.net/projects/bbmap/](https://sourceforge.net/projects/bbmap/)]. The corresponding pipeline was  
1417 constructed using Snakemake (Köster & Rahmann, 2012). Further analyses were performed  
1418 using QIIME 2 2018.11 (Bolyen et al., 2019). The paired end reads were denoised and joined  
1419 using the DADA2 plugin (Callahan et al., 2016) using batch-specific trimming length  
1420 parameters yielding  $9.1 \pm 2.0$ K amplicon sequence variants (ASVs) per run for V1-V2,  
1421  $4.5 \pm 1.6$ K for V3V4 and  $6.8 \pm 0.67$ K for V5V6 amplicon. ASVs mapping to known contaminant  
1422 taxa as well as ASVs with abundance negatively correlated with coverage depth were removed.  
1423 Samples that more than 20% contaminant ASVs were eliminated from further analyses. ASVs

1424 were then clustered to 97% identity level OTUs using the DNACLUSt program (Ghodsi et al.,  
1425 2011). After OTU assignment, read counts were rarefied to 10,000 (V1-V2 and V5-V6) and  
1426 5,000 (V3-V4). As intestinal location only explored a minor proportion of the variance in OTU  
1427 abundance (Shagam, in preparation), OTU abundances were averaged across locations. Local  
1428 alignment identity of the detected ASVs with the OTU-476 and OTU-327 from the pig  
1429 microbiome were measured using blastn (Altschul et al., 1990). The effect of ABO blood group  
1430 on standardized abundances of individual OTUs was performed using a linear model (lm R  
1431 function) including (i) ABO blood group (A, B, AB or O), (ii) secretor status, (iii) sex, (iv)  
1432 smoking status, (v) age and (vi) BMI. Analyses were conducted separately for the different  
1433 amplicons.

#### 1434 **Association analysis of 2.3-kb deletion of ABO gene with porcine complex traits**

1435 The associations between the 2.3Kb ABO deletion and 150 traits were calculated in the F6 and  
1436 F7 populations based on a meta-analysis combining the effects. The observed P value for a trait  
1437 was calculated by testing a weighted mean of Z scores from F6 and F7 generations as follows:  
1438  $Z = Z1W1+Z2W2/(W1+ W2)$ , where  $Z1 = b1/SE1$  and  $Z2 = b2/SE2$ ,  $W1 = 1/(SE1)^2$  and  $W2$   
1439  $= 1/(SE2)^2$ , where the subscripts 1 and 2 denote F6 and F7 generations, respectively;  $b1$ ,  $b2$ ,  
1440  $SE1$  and  $SE2$  were effects and standard errors of ABO locus on a given trait estimated from a  
1441 linear mixed model, which accounted for population structure using a genomic relationship  
1442 matrix derived from whole genome marker genotypes. A total of 250 and 254 traits were tested  
1443 in F6 and F7 generation, while 150 traits that were shared in F6 and F7 generations were used  
1444 for meta-analysis.

1445

#### 1446 **Author contributions**

1447 HY analyzed the 16S rRNA sequencing data, performed the GWAS, meta-analyses and local  
1448 association analyses, computed heritabilities of individual taxa, contributed to ABO  
1449 genotyping and analyzed the effect of the 2.3 Kb deletion on taxa abundance. JW analyzed  
1450 the composition of the microbiome including PCoA analyses, computation of  $\beta$ - and  $\alpha$ -  
1451 diversity, computed correlations between kinship and microbiome dissimilarities and their  
1452 significance, isolated the OTU476-like strains, performed the GalNAc feeding experiments,  
1453 measured the concentrations of GalNAC in cecal lumen, analyzed the GalNAc import and  
1454 utilization pathway in the MAGs, and contributed to ABO genotyping. XH participated in 16S  
1455 rRNA sequencing (F6) and GWAS (F6). YZ performed metagenome sequencing analysis,  
1456 analyzed the GalNAc import and utilization pathway in the MAGs, analyzed the RNA seq data

1457 from cecum samples, and contributed to ABO genotyping. YZ participated in the preparation  
1458 of the genotype data from whole genome sequence information, participated in the  
1459 computation of the genomic contribution of the different breeds in the F6 and F7 generation  
1460 and the definition of expected mapping resolution, performed LD analyses, performed eQTL  
1461 analysis for the ABO gene, participated in the characterization and sequence analysis of the  
1462 ABO gene including definition of the 2.3 Kb deletion, and participated in the balancing  
1463 selection and trans-species polymorphism analyses. ML assisted with the isolation of the  
1464 OTU476-like strains, the GalNAc feeding experiments, and genotyping of the ABO gene. QL  
1465 assisted with measuring the concentrations of GalNAc in cecal lumen. SK, MH, HF, SF, XX, HJ,  
1466 SC and JG assisted with the experiments. XT determined the expression profiles of ABO gene  
1467 in different tissues of adult and fteus pigs. ZZ, ZW, HG and YH assisted with the preparation  
1468 of genotype data from whole-genome sequence data and conducted the analysis of the  
1469 Nanopore data of the ABO region. JM assisted with the construction of the mosaic population.  
1470 HA assisted with the bioinformatic analysis of the ABO region, the de novo assembly of the A  
1471 allele, and the evolutionary analysis of the ABO alleles. LS analyzed the effect of ABO genotype  
1472 on intestinal microbiota composition in humans. WC assisted in the analysis of the sequence  
1473 data for the trans-species polymorphisms analysis. CaCh supervised the characterization of  
1474 the ABO gene and the 2.3 Kb deletion and the corresponding haplotype structure in the F0,  
1475 F6 and F7 population and for the trans-species polymorphism. BY prepared the genotype  
1476 data of whole-genome variants, assisted with the raising of swine heterogeneous stock, and  
1477 participated in the computation of the genomic contribution of the different breeds in the F6  
1478 and F7 generation and the definition of expected mapping resolution. MG supervised the  
1479 bioinformatic and statistical analyses, performed bioinformatic and statistical analyses, and  
1480 wrote the paper. CC codesigned the study, supervised experiments, supervised bioinformatic  
1481 and statistical analyses of gut microbiome and wrote the paper. LH created the swine  
1482 heterogeneous stock, designed the study, directed the project, supervised the experiments  
1483 and analyses, and wrote the paper.

1484

#### 1485 **Data accessibility**

1486 The 16S rRNA sequencing data and the genotype data of the F0, F6 and F7 were submitted to  
1487 the CNGB database and have accession number CNP0001069. The metagenomic sequence  
1488 data were submitted to the CNGB database and have accession number CNP0000824.

1489

1490 **Acknowledgements**

1491 We are very grateful to Yuyong He, Shijun Xiao, Wanbo Li, Yuanmei Guo and Yuyun Xing for  
1492 their great assistance in the construction of the experimental mosaic pig populations, and to  
1493 Ying Su and Jing Li for their preparation of reagents and management of samples. We are also  
1494 grateful to Yukihide Momozawa, Rob Mariman, Myriam Mni, Latifa Karim and Manon Dekkers  
1495 for generating the CEDAR-1 16S rRNA data. Lusheng Huang is supported by The National  
1496 Natural Science Foundation of China (31790410) and National pig industry technology system  
1497 (CARS-35). We thank the long-term projects support from Jiangxi department for education,  
1498 the Ministry of Science and Technology of P.P. China, the Ministry of Agriculture and Rural  
1499 Affairs of P. R. China, and Jiangxi department of Science and Technology for the swine  
1500 heterogeneous stock. Congying Chen was supported by the National Natural Science  
1501 Foundation of China (31772579). Hui Yang is supported by National Postdoctoral Program for  
1502 Innovative Talent (No. BX201700102). Lev Shagam is supported by the FNRS IBD-GI-Seq  
1503 project to Souad Rahmouni. Michel Georges is supported by the Chinese Thousand Talents  
1504 Program and the Belgian EOS “Miquant” project. Carole Charlier is Senior Research Associate  
1505 from the FNRS.

1506

1507 **References**

1508 Ai, H., *et al.* Adaptation and possible ancient interspecies introgression in pigs identified by  
1509 whole-genome sequencing. *Nat Genet* **47**, 217-225 (2015).

1510 Aleman, F.D.D., Valenzano, D.R. Microbiome evolution during hots aging. *PLoS Pathog* **15**,  
1511 e1007727 (2019).

1512 Altschul, S.F., Gish, W., Miller, W., Myers, E.W., Lipman, D.J. Basic alocal alignment search tool.  
1513 *J Mol Biol* **215**, 403-410 (1990).

1514 Aulchenko, Y. S., Ripke, S., Isaacs, A. & van Duijn, C. M. GenABEL: an R library for genome-wide  
1515 association analysis. *Bioinformatics* **23**, 1294-1296 (2007).

1516 Bidart, G.N., Rodriguez-Diaz, J., Monedero, V., Yebra, M.J A unique gene cluster for the  
1517 utilization of the mucosal and human milk-associated glycans galacto-N-biose and lacto-N-  
1518 biose in *Lactobacillus casei*. *Mol Microbiol* **93**, 521-538 (2014).



- 1519 Blancher, A. Evolution of the ABO supergene family. *ISBT Science Series* **8**, 201-206 (2013).
- 1520 Blekhman, R. *et al.* Host genetic variation impacts microbiome composition across human  
1521 body sites. *Genome Biol* **16**, 191 (2015).
- 1522 Bolger, A.M., Lohse, M., Usadel, B. Trimmomatic: a flexible trimmer for Illumina sequence data.  
1523 *Bioinformatics* **30**, 2114-2120 (2014).
- 1524 Bolyen, E. *et al.* Reproducible, interactive, scalable and extensible microbiome data science  
1525 using QIIME2. *Nat Biotechnol* **37**, 852-857 (2019).
- 1526 Bonder, M.J. *et al.* The effect of host genetics on the gut microbiome. *Nat Genet* **48**, 1407-  
1527 1412 (2016).
- 1528 Boren, T. *et al.* Attachment of *Helicobacter pylori* to human gastric epithelium mediated by  
1529 blood group antigens. *Science* **262**, 1892-1895 (1993).
- 1530 Boyle, E.A., Li, Y.I., Pritchard, J.K. An expanded view of complex traits: from polygenic to  
1531 omnigenic. *Cell* **169**, 1177-1186 (2017).
- 1532 Bray, J.R. and Curtis, J.T. An ordination of upland forest communities of southern Wisconsin.  
1533 *Ecological Monographs* **27**, 325-349 (1957).
- 1534 Brinkkötter, A.B., Klöss, H., Alpert, C.-A., Lengeler, J.W. Pathways for the utilization of N-acetyl-  
1535 galactosamine and galactosamine in *Escherichia coli*. *Mol Microbiol* **37**, 125-135 (2000).
- 1536 Browning, S. R. & Browning, B. L. Rapid and accurate haplotype phasing and missing-data  
1537 inference for whole-genome association studies by use of localized haplotype clustering. *Am*  
1538 *J Hum Genet* **81**, 1084-1097 (2007).
- 1539 Callahan, B.J., McMurdie, P.J., Rosen, M.J., Han, A.W., Johnson, A.J.A., Holmes, S.P. DADA2:  
1540 high-resolution sample inference from Illumina amplicon data. *Nat Methods* **13**, 581-583  
1541 (2016).
- 1542 Camus, D., Bina, J.C., Carlier, Y., Santoro, F. ABO blood groups and clinical forms of  
1543 schistosomiasis mansoni. *Trans R Soc Trop Med Hyg* **71**, 182 (1977).
- 1544 Chang, C. C. *et al.* Second-generation PLINK: rising to the challenge of larger and richer  
1545 datasets. *Gigascience* **4**, 7 (2015).
- 1546 Charlier, C., Li, W., Harland, C., Littlejohn, M., Coppieters, W., Creagh, F., Davis, S., Druet, T.,

- 1547 Faux, P., Guillaume, F., Karim, L., Keehan, M., Kadri, N.K., Tamma, N., Spelman, R., Georges, M.  
1548 NGS-based reverse genetic screen for common embryonic lethal mutations compromising  
1549 fertility in livestock. *Genome Res* **26**, 133-1341 (2016).
- 1550 Chaudhuri, A., De S. Cholera and blood groups. *Lancet* **ii**, 404 (1977).
- 1551 Cheema, M.U., Pluznick, J.L. Gut Microbiota Plays a Central Role to Modulate the Plasma and  
1552 Fecal Metabolomes in Response to Angiotensin II. *Hypertension* **74**, 184-193 (2019).
- 1553 Chen, S., Zhou, Y., Chen, Y. & Gu, J. fastp: an ultra-fast all-in-one FASTQ preprocessor.  
1554 *Bioinformatics* **34**, i884-i890 (2018).
- 1555 Chen, Y. *et al.* ABO blood group and susceptibility to severe acute respiratory syndrome. *JAMA*  
1556 **293**, 1450-1451 (2005).
- 1557 Choi, M.K., Le, M.T., Cho, H., Yum, J., Kang, M., Song, H., Kim, J.H., Chung, H.J., Hong, K., Park,  
1558 C. Determination of complete sequence information of the human ABO blood group  
1559 orthologous gene in pigs and breed differences in blood type frequencies. *Gene* **640**,1-5  
1560 (2018).
- 1561 Cooling, L. Blood groups in infection and host susceptibility. *Clin Microbiol Rev* **28**, 801-870  
1562 (2015).
- 1563 Coppieters, W., Karim, L., Georges, M. SNP-based deconvolution of biological mixtures:  
1564 application to the detection of cows with subclinical mastitis by whole genome sequencing of  
1565 tank milk. *Genome Res*, in the press (2020).
- 1566 Davenport, E.R, Goodrich, J.K., Cell, J.T., Spector, T., Ley, R.E., Clark, A.G. ABO antigen and  
1567 secretor statuses are not associated with gut microbiota composition in 1,500 twins. *BMC*  
1568 *Genomics* **17**, 941-955 (2016).
- 1569 DePristo, M., Banks, E., Poplin, R., Garimella, K., Maguire, J., Hartl, C., Philippakis, A., del Angel,  
1570 G., Rivas, M.A., Hanna, M., McKenna, A., Fennell, T., Kernytsky, A., Sivachenko, A., Cibulskis,  
1571 K., Gabriel, S., Altshuler, D., Daly, M. A framework for variation discovery and genotyping  
1572 using next-generation DNA sequencing data. *Nat Genet* **43**, 491-498 (2011).
- 1573 DeSantis, T.Z., Hugenholtz, P., Larsen, N., Rojas, M., Brodie, E.L., Keller, K., Huber, T., Dalevi,  
1574 D., Hu, P., Andersen, G.L. Greengenes, a chimera-checked 16S rRNA gene database and  
1575 workbench compatible with ARB. *Appl Environ Microbiol* **72**, 5069-5072 (2006).

- 1576 Dixon P. VEGAN, a package of R functions for community ecology. *J Veg Sci* **14**, 927-930 (2003).
- 1577 Dobin, A., Davis, C.A., Schlesinger, F., Drenkow, J., Zaleski, C., Jha, S., Batut, P., Chaisson, M.,  
1578 Gingeras, T.R. STAR: ultrafast universal RNA-Seq aligner. *Bioinformatics* **29**, 15-21 (2013).
- 1579 Donaldson, G.P., Lee, S.M., Mazmanian, S.K. Gut biogeography of the bacterial microbiota.  
1580 *Nat Rev Microbiol* **14**, 20-32 (2016).
- 1581 Edgar, R.C. Search and clustering orders of magnitude faster than BLAST. *Bioinformatics* **26**,  
1582 2460-2461 (2010).
- 1583 Ellinghaus, D. *et al.* The ABO blood group locus and a chromosome 3 gene cluster associate  
1584 with SARS-CoV-2 respiratory failure in an Italian-Spanish genome-wide association analysis.  
1585 *medRxiv*, <https://www.medrxiv.org/content/10.1101/2020.05.31.20114991v1> (2020).
- 1586 Falconer, D.S., Mackay, T.F.C. Introduction to quantitative genetics. 4<sup>th</sup> Edition. Pearson  
1587 education Limited. (1996).
- 1588 Frantz, L.A.F. *et al.* Evidence of long-term gene flow and selection during domestication from  
1589 analyses of Eurasian wild and domestic pig genomes. *Nat Genet* **47**, 1141-1148 (2015).
- 1590 Georges, M., Charlier, C., Hayes, B. Harnessing genomic information for livestock improvement.  
1591 *Nat Rev Genet* **20**, 135-156 (2019).
- 1592 Gerlades, A. *et al.* Inferring the history of speciation in house mice from autosomal, X-linked,  
1593 Y-linked and mitochondrial genes. *Mol Ecol* **17**, 5349-5363 (2008).
- 1594 Ghodsi, M., Liu, B., Pop, M. DNACLUST: accurate and efficient clustering of phylogenetic  
1595 marker genes. *BMC Bioinformatics* **12**, 271 (2011).
- 1596 Goodrich, J.K., Waters, J.L., Poole, A.C., Sutter, J.L., Koren, O., Blekhman, R., Beaumont, M.,  
1597 Van Treuren, W., Knight, R., Bell, J.T., Spector, T.D., Clark, A.G., Ley, R.E. Human genetics shape  
1598 the gut microbiome. *Cell* **159**, 789-799 (2014).
- 1599 Goodrich, J.K., Davenport, E.R., Beaumont, M., Jackson, M.A., Knight, R., Ober, C., Spector,  
1600 T.D., Bell, J.T., Clark, A.G., Ley, R.E. Genetic Determinants of the Gut Microbiome in UK Twins.  
1601 *Cell Host Microbe* **19**, 731-743 (2016).
- 1602 Groenen, M.A.M. A decade of pig genome sequencing: window on pig domestication and  
1603 evolution. *Genet Sel Evol* **48**, 23-32 (2016).

- 1604 Hanson, M.E.B. *et al.* Population structure of human gut bacteria in a diverse cohort from  
1605 rural Tanzania and Botswana. *Genome Biology* **20**, 16 (2019).
- 1606 Harris, R. S. *Improved pairwise alignment of genomic DNA*. Doctor thesis, The Pennsylvania  
1607 State University (2007).
- 1608 Haseman, J.K. and Elston, R.C. The investigation of linkage between a quantitative trait and a  
1609 marker locus. *Behav Genet* **2**, 3-19 (1972).
- 1610 Hughes, D.A., Bacigalupe, R., Wang, J., Ruhlemann, M.C., Tito, R.Y., Falony, G., Joossens, M.,  
1611 Vieira-Silva, S., Henckaerts, L., Rymenans, L., *et al.*. Genome-wide associations of human gut  
1612 microbiome variation and implications for causal inference analyses. *Nat Microbiol*, Online  
1613 ahead of print (2020). 10.1038/s41564-020-0743-8
- 1614 Hunt, M. *et al.* Circlator: automated circularization of genome assemblies using long  
1615 sequencing reads. *Genome Biol* **16**, 294 (2015).
- 1616 Hu, Z., Patel, I.R. & Mukherjee, A. Genetic analysis of the roles of *agaA*, *agal*, and *agaS* genes  
1617 in the N-acetyl-D-galactosamine and D-galactosamine catabolic pathways in *Escherichia coli*  
1618 strains O157:H7 and C. *BMC Microbiol* **13**, 94 (2013).
- 1619 Huang, H. *et al.* Fine-mapping inflammatory bowel disease loci to single-variant resolution.  
1620 *Nature* **547**, 173-178.
- 1621 Hyatt, D., *et al.* Prodigal: prokaryotic gene recognition and translation initiation site  
1622 identification. *BMC Bioinformatics* **11**, 119 (2010).
- 1623 Kadri, N.K. *et al.* A 660-Kb deletion with antagonistic effects on fertility and milk production  
1624 segregates at high frequency in Nordic red cattle: additional evidence for the common  
1625 occurrence of balancing selection in livestock. *PLoS Genet* **10**, e1004049 (2014)
- 1626 Kanehisa, M., Sato, Y., Morishima, K. BlastKOALA and GhostKOALA: KEGG tools for functional  
1627 characterization of genome and metagenome sequences. *J Mol Biol* **428**, 726-731 (2016).
- 1628 Kelly, R.J., Rouquier, S., Giorgi, D., Lennon, G.G., Lowe, S.B. Sequence and expression of a  
1629 candidate for the human Secretor blood group  $\alpha(1,2)$  fucosyltransferase gene (*FUT2*). *J Biol*  
1630 *Chem* **270**, 4640-4649 (1995)
- 1631 Kittelman, S., *et al.* Two different bacterial community types are linked with the low-methane  
1632 emission trait in sheep. *PLoS ONE* **9**, e103171 (2014).

- 1633 Kolmogorov, M., Yuan, J., Lin, Y. & Pevzner, P. A. Assembly of long, error-prone reads using  
1634 repeat graphs. *Nat Biotechnol* **37**, 540-546 (2019).
- 1635 Koonin, E.V. Evolution of genome architecture. *Int J Biochem Cell Biol* **41**, 298-306 (2009)
- 1636 Köster, J. and Rahmann, S. Snakemake: a scalable bioinformatics workflow engine.  
1637 *Bioinformatics* **28**, 2520-2522 (2012).
- 1638 Kundu, P., Blacher, E., Elinav, E., Pettersson, S. Our gut microbiome: the evolving inner self.  
1639 *Cell* **171**, 1481-1493 (2017).
- 1640 Lawrence, J. Selfish operons: the evolutionary impact of gene clustering in prokaryotes and  
1641 eukaryotes. *Curr Opin Genet Dev* **9**, 642-648 (1999).
- 1642 Leyn, S.A., Gao, F., Yang, C., Rodionov, D.A. N-acetylgalactosamine utilization pathway and  
1643 regulon in proteobacteria. *J Biol Chem* **287**, 28047-28056 (2012).
- 1644 Li, H., Handsaker, B., Wysoker, A., Fennell, T., Ruan, J., Homer, N., Marth, G., Abecassis, G.,  
1645 Durbin, R. The sequence alignment/map format and SAMtools. *Bioinformatics* **25**, 2078-2079  
1646 (2009).
- 1647 Li, H., Durbin, R. Fast and accurate long-read alignment with Burrows–Wheeler transform.  
1648 *Bioinformatics* **26**, 589-595 (2010).
- 1649 Li, H. Aligning sequence reads, clone sequences and assembly contigs with BWA-MEM.  
1650 [arXiv:1303.3997](https://arxiv.org/abs/1303.3997) (2013).
- 1651 Li, D., *et al.* MEGAHIT v1.0: A fast and scalable metagenome assembler driven by advanced  
1652 methodologies and community practices. *Methods* **102**, 3-11 (2016).
- 1653 Li, H. Minimap2: pairwise alignment for nucleotide sequences. *Bioinformatics* **34**, 3094-3100  
1654 (2018).
- 1655 Liao, Y., Smyth, G.K., Shi, W. featureCounts: an efficient general-purpose program for  
1656 assigning sequence reads to genomic features. *Bioinformatics* **30**, 923-930 (2014).
- 1657 Lindesmith, L. *et al.* Human susceptibility and resistance to Norwalk virus infection. *Nat Med*  
1658 **9**, 548-553 (2003).
- 1659 Magoc, T. & Salzberg, S. L. FLASH: fast length adjustment of short reads to improve genome  
1660 assemblies. *Bioinformatics* **27**, 2957-2963 (2011).

- 1661 Mahowald, M.A., Rey, F.E., Seedorf, H., Turnbaugh, P.J., Fulton, R.S., Wollam, A. *et al.*  
1662 Characterizing a model human gut microbiota composed of members of its two dominant  
1663 bacterial phyla. *Proc Natl Acad Sci USA* **106**, 5859-5864 (2009).
- 1664 Makivuokko, H., Lahtinen, S.J., Wacklin, P., Tuovinen, E., Tenkanen, H., Nikkila, J., Bjorklund,  
1665 M., Aranko, K., Ouwenhand, A.C., Matto, J. Association between the ABO blood group and  
1666 the human intestinal microbiota composition. *BMC Microbiol* **12**, 94 (2012).
- 1667 Malmuthuge, N., Griebel, P.J., Guan, L.L. Taxonomic identification of commensal bacteria  
1668 associated with the mucosa and digesta throughout the gastrointestinal tracts of preweaned  
1669 calves. *Appl Environ Microbiol* **80**, 2021-2028 (2014).
- 1670 Momozawa, Y. *et al.* IBD risk loci are enriched in multigenic regulatory modules encompassing  
1671 putative causative genes. *Nat Commun* **9**, 2427 (2018).
- 1672 Ndamba, J., Gomo, E., Nyazema, N., Makaza, N., Kaondera, K.C. Schistosomiasis infection in  
1673 relation to the ABO blood groups among school children in Zimbabwe. *Acta Trop* **65**,181-190  
1674 (1997).
- 1675 Nei, M. F-statistics and analysis of gene diversity in subdivided populations. *Ann Hum Genet*  
1676 **41**, 225-233 (1977).
- 1677 O'Hara, E., Neves, A.L.A., Song, Y., Guan, L.L. The role of the gut microbiome in cattle  
1678 production and health: driver or passenger? *Annu Rev Anim Biosci* **8**, 199-220 (2020).
- 1679 Olm, M.R., Brown, C.T., Brooks, B. & Banfield, J.F. dRep: a tool for fast and accurate genomic  
1680 comparisons that enables improved genome recovery from metagenomes through de-  
1681 replication. *ISME J* **11**, 2864-2868 (2017).
- 1682 Parks, D.H., Imelfort, M., Skennerton, C.T., Hugenholtz, P. & Tyson, G.W. CheckM: assessing  
1683 the quality of microbial genomes recovered from isolates, single cells, and metagenomes.  
1684 *Genome Res* **25**, 1043-1055 (2015).
- 1685 Patterson, N., *et al.* Genetic evidence for complex speciation of humans and chimpanzees.  
1686 *Nature* **441**, 1103-1108 (2006).
- 1687 Pereira, F.E.L., Bortolini, E.R., Carneiro, J.L.A., da Silva, C.R.M., Neves, R.C. A,B,O blood groups  
1688 and hepatosplenic form of schistosomiasis mansoni (Symmer's fibrosis). *Trans R Soc Trop Med*  
1689 *Hyg* **71**,182 (1977).

- 1690 Polderman, T.J.C. *et al.* Meta-analysis of the heritability of human traits based on 50 years of  
1691 twin studies. *Nat Genet* **47**, 702-709 (2015).
- 1692 Polubriaginof, F.C.G. *et al.* Disease heritability inferred from familial relationships reported in  
1693 medical records. *Cell* **173**, 1692-1704 (2018).
- 1694 Quast, C., Pruesse, E., Yilmaz, P., Gerken, J., Schweer, T., Yarza, P., Peplies, J., Glöckner, F.O.  
1695 The SILVA ribosomal RNA gene database project: improved data processing and web-based  
1696 tools. *Nucleic Acids Res* **41**, D590-D596 (2013).
- 1697 Radjabzadeh D, Boer CG, Beth SA, van der Wal P, Kiefte-De Jong JC, Jansen MAE, Konstantinov  
1698 SR, Peppelenbosch MP, Hays JP, Jaddoe VWV, Ikram MA, Rivadeneira F, van Meurs JBJ,  
1699 Uitterlinden AG, Medina-Gomez C, Moll HA, Kraaij R. Diversity, compositional and functional  
1700 differences between gut microbiota of children and adults. *Sci Rep* **10**, 1040 (2020).
- 1701 Ravcheev, D.A., Thiele, I. Comparative genomic analysis of the human gut microbiome reveals  
1702 a broad distribution of metabolic pathways for the degradation of host-synthesized mucin  
1703 glycans and utilization of mucin-derived monosaccharides. *Front Genet* **8**, 111 (2017).
- 1704 Rimmer, A. *et al.* Integrating mapping-, assembly- and haplotype-based approaches for calling  
1705 variants in clinical sequencing applications. *Nat Genet* **46**, 912-918 (2014).
- 1706 Rodionov, D.A., Yang, C., Li, X., Rodionova, I.A., Wang, Y., Obraztsova, A.Y., Zagnitiko, O.P.  
1707 Overbeek, R., Romine, M.F., Reed, S., Frederickson, J.F., Nealson, K.H., Osterman, A.L.  
1708 Genomic encyclopedia of sugar utilization pathways in the *Shewanella* genus. *BMC*  
1709 *Genomics* **11**, 494 (2010).
- 1710 Rognes, T., Flouri, T., Nichols, B., Quince, C. & Mahe, F. VSEARCH: a versatile open source tool  
1711 for metagenomics. *PeerJ* **4**, e2584 (2016).
- 1712 Ross, E.M., Moate, P.J., Marett, L.C., Cocks, B.G., Hayes, B.J. Metagenomic predictions: from  
1713 microbiome to complex health and environmental phenotypes in human and cattle. *PLOS*  
1714 *ONE* **8**, e73056 (2013).
- 1715 Rothschild, D., *et al.* Environment dominates over host genetics in shaping human  
1716 gut microbiota. *Nature* **555**, 210-215 (2018).

- 1717 Rowe, J.A. *et al.* Blood group O protects against severe *Plasmodium falciparum* malaria  
1718 through the mechanism of reduced rosetting. *Proc Natl Acad Sci USA* **104**, 17471-17476  
1719 (2007).
- 1720 Sankararaman, S., Mallick, S., Dannemann, M., Prüfer, K., Kelso, J., Pääbo, S., Patterson, N.,  
1721 Reich, D. The genomic landscape of Neanderthal ancestry in present-day humans. *Nature* **507**,  
1722 354-357 (2014).
- 1723 Schlamp, F., Zhang, D.Y., Cosgrove, E., Simecek, P., Edwards, M., Goodrich, J.K., Ley, R.E.,  
1724 Churchill, G.A., Clark, A.G. High-resolution QTL mapping with diversity outbred mice identifies  
1725 genetic variants that impact gut microbiome composition. bioRxiv  
1726 <https://doi.org/10.1101/722744> (2019).
- 1727 Schloss, P. D. *et al.* Introducing mothur: open-source, platform-independent, community-  
1728 supported software for describing and comparing microbial communities. *Applied and*  
1729 *environmental microbiology* **75**, 7537-7541 (2009).
- 1730 Schmidt, T.S.B., Raes, J., Bork, P. The human gut microbiome: from association to modulation.  
1731 *Cell* **172**, 1198-1215 (2018).
- 1732 Segata, N., Bornigen, D., Morgan, X.C. & Huttenhower, C. PhyloPhlAn is a new method for  
1733 improved phylogenetic and taxonomic placement of microbes. *Nat Commun* **4**, 2304 (2013).
- 1734 Ségurel, L., Thompson, E.E., Flutre, T., Lovstad, J., Venkat, A., Margulis, S.W., Moyse, J., Ross,  
1735 S., Gamble, K., Sella, G., Ober, C., Przeworski, M. The ABO blood group is a trans-species  
1736 polymorphism in primates. *Proc Natl Acad Sci USA* **109**, 18493-18498 (2012).
- 1737 Srivastava, A., *et al.* Genomes of the mouse collaborative cross. *Genetics* **206**, 537-556 (2017).
- 1738 The 1000 Genomes project Consortium. A map of human genome variation from population-  
1739 scale sequencing. *Nature* **467**, 1061-1073 (2010)
- 1740 Turpin, W. *et al.* Association of host genome with intestinal microbial composition in a large  
1741 healthy cohort. *Nature genetics* **48**, 1413-1417 (2016).
- 1742 Uritskiy, G.V., DiRuggiero, J. & Taylor, J. MetaWRAP-a flexible pipeline for genome-resolved  
1743 metagenomic data analysis. *Microbiome* **6**, 158 (2018).
- 1744 Vaser, R., Sovic, I., Nagarajan, N. & Sikic, M. Fast and accurate de novo genome assembly from  
1745 long uncorrected reads. *Genome Res* **27**, 737-746 (2017).



- 1746 Van der Auwera, G. A. *et al.* From FastQ data to high confidence variant calls: the Genome  
1747 Analysis Toolkit best practices pipeline. *Curr Protoc Bioinformatics* **43**, 11.10.11-11.10.33  
1748 (2013).
- 1749 Visscher, P.O., *et al.* Assumption-free estimation of heritability from genome-wide identity-  
1750 by-descent sharing between full-sibs. *PLoS Genet* **2**, e41 (2006).
- 1751 Walker, B. J. *et al.* Pilon: an integrated tool for comprehensive microbial variant detection and  
1752 genome assembly improvement. *PLoS One* **9**, e112963 (2014).
- 1753 Walter J., Armet, A.M., Brett Finlay, B., Shanahan, F. Establishing or exaggerating causality for  
1754 the gut microbiome: lessons from human microbiota-associated rodents. *Cell* **180**, 221-231  
1755 (2020).
- 1756 Wang, Q., Garrity, G. M., Tiedje, J. M. & Cole, J. R. Naive Bayesian classifier for rapid  
1757 assignment of rRNA sequences into the new bacterial taxonomy. *Applied and environmental*  
1758 *microbiology* **73**, 5261-5267 (2007).
- 1759 Wang, M., Pryce, J.E., Savin, K., Hayes, B.J. Prediction of residual feed intake from genome  
1760 and metagenome profiles in first lactation Holstein-Friesian dairy cattle. *Proc. Assoc. Adv.*  
1761 *Breed. Genet.* **21**, 89-92 (2015).
- 1762 Wang, S., Cuesta-Seijo, J.A., Striebeck, A., Lafont, B., Palcic, M.M., Vidal, S. Design of glycosyl  
1763 transferase inhibitors: serine analogues as pyrophosphate surrogates? *ChemPlusChem* **80**,  
1764 1525-1532 (2015).
- 1765 Wang, J. *et al.* Genome-wide association analysis identifies variation in vitamin D receptor  
1766 and other host factors influencing the gut microbiota. *Nat Genet* **48**, 1396-1406 (2016).
- 1767 Warr, A., Affara, N., Aken, B., Beiki, H., Bickhart, D. M., Billis, K., Chow, W., Eory, L., Finlayson,  
1768 F. A., Flicek, P., Girón, C. G., Griffin, D. K., Hall, R., Hannum, G., Hourlier, T., Howe, K., Hume,  
1769 D. A., Izuogu, O., Kim, K., Koren, S., Liu, H., Manchanda, N., Martin, F. J., Nonneman, D. J.,  
1770 O'Connor, R. E., Phillippy, A. M., Rohrer, G. A., Rosen, B. D., Rund, L. A., Sargent, C. A., Schook,  
1771 L. B., Schroeder, S. G., Schwartz, A. S., Skinner, B. M., Talbot, R., Tseng, E., Tuggle, C. K., Watson,  
1772 M., Smith, T. P. L. & Archibald, A. L. An improved pig reference genome sequence to enable  
1773 pig genetics and genomics research. bioRxiv, doi: <https://doi.org/10.1101/668921>.

- 1774 Weir, B.S., Cockerham, C.C. Estimating F-statistics for the analysis of population structure.  
1775 *Evolution* **38**, 1358-1370 (1984).
- 1776 Willer, C.J., Li, Y., Abecasis, G.R. METLA: fast and efficient meta-analysis of genomewide  
1777 association scans. *Bioinformatics* **26**, 2190-2191 (2010).
- 1778 Yang, J., Lee, S. H., Goddard, M. E. & Visscher, P. M. GCTA: a tool for genome-wide complex  
1779 trait analysis. *Am J Hum Genet* **88**, 76-82 (2011).
- 1780 Yatsunenko, T. *et al.* Human gut microbiome viewed across age and geography. *Nature* **486**,  
1781 222-227 (2012).
- 1782 Yengo, L. *et al.* Meta-analysis of genome-wide association studies for height and body mass  
1783 index in ~700,000 individuals of European ancestry. *Hum Mol Genet* **27**, 3641-3649 (2018).
- 1784 Yu, N., Zhao, Z., Fu, Y.-X., Sambuughin, N., Ramsay, M., Jenkins, T., Leskinen, E., Patthy, L.,  
1785 Jorde, L.B., Kuromori, T., Li, W.-H. Global patterns of human DNA sequence variation in a 10-  
1786 kb region on chromosome 1. *Mol. Biol. Evol.* **18**, 214-222 (2001).
- 1787 Zhang, H., Ravcheev, D.A., Hu, D., Zhang, F., Gong, X., Hao, L., Cao, M., Rodionov, D.A., Wang,  
1788 C., Feng, Y. Two novel regulators of N-acetyl-galactosamine utilization pathway and distinct  
1789 roles in bacterial infections. *Microbiol Open* **4**, 983-1000 (2015).
- 1790 Zhou, X. & Stephens, M. Genome-wide efficient mixed-model analysis for association studies.  
1791 *Nat Genet* **44**, 821-824 (2012).
- 1792
